# Supplementary material for: Meta-CF3-Substituted Analogues of the GFP Chromophore with Remarkable Solvatochromism
Source: Int J Mol Sci. 2023 Jun 8;24(12):9923. doi: 10.3390/ijms24129923 (PMC10298595; doi:10.3390/ijms24129923)

## Supporting Information

|                                                                                        |            |
|----------------------------------------------------------------------------------------|------------|
| <b>1. Synthesis results</b>                                                            | <b>S2</b>  |
| <b>2. Solvatochromic properties</b>                                                    | <b>S12</b> |
| <b>3. Solid-state and aggregation-induced emission</b>                                 | <b>S17</b> |
| <b>4. Copies of <math>^1\text{H}</math> and <math>^{13}\text{C}</math> NMR spectra</b> | <b>S25</b> |

## 1. Synthesis results

### 4-(dimethylamino)-3-(trifluoromethyl)benzaldehyde

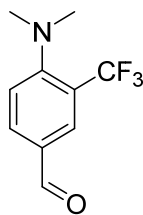

Yield 2.82 g (88%), colorless oil.

$^1\text{H}$  NMR (700 MHz, DMSO- $d_6$ ),  $\delta$  (ppm): 2.94 (s, 6H), 7.34 (d,  $J=8.6$  Hz, 1H), 7.97 (dd,  $J=8.7$ , 2.0 Hz, 1H), 8.11 (d,  $J=1.9$  Hz, 1H), 9.88 (s, 1H).

$^{13}\text{C}$  NMR (176 MHz, DMSO- $d_6$ ),  $\delta$  (ppm): 43.5 (2C), 117.9 (q,  $J=30.1$  Hz, 1C), 120.0 (1C), 124.1 (q,  $J=272.1$  Hz, 1C), 127.8 (1C), 131.1 (q,  $J=5.7$  Hz, 1C), 132.8 (1C), 155.8 (1C), 190.3 (1C).

HRMS found,  $m/z$ : 218.0780  $[\text{M}+\text{H}]^+$ .  $\text{C}_{10}\text{H}_{10}\text{F}_3\text{NO}$ . Calculated,  $m/z$ : 218.0787.

### 4-(pyrrolidin-1-yl)-3-(trifluoromethyl)benzaldehyde

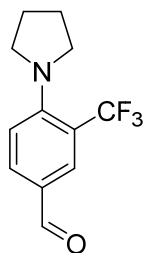

Yield 1.57 g (44%), yellowish solid, m.p. 48-51°C.

$^1\text{H}$  NMR (700 MHz, DMSO- $d_6$ ),  $\delta$  (ppm): 1.90 - 1.98 (m, 4H), 3.44 - 3.51 (m, 4H), 7.07 (d,  $J=9.0$  Hz, 1H), 7.85 (dd,  $J=9.0$ , 1.9 Hz, 1H), 8.09 (d,  $J=1.9$  Hz, 1H), 9.78 (s, 1H).

$^{13}\text{C}$  NMR (176 MHz, DMSO- $d_6$ ),  $\delta$  (ppm): 25.3 (2C), 51.1 (2C), 111.3 (q,  $J=31.1$  Hz, 1C), 116.8 (1C), 124.3 (1C), 124.6 (q,  $J=271.4$  Hz, 1C), 132.2 (2C), 150.5 (1C), 189.7 (1C).

HRMS found,  $m/z$ : 244.0938  $[\text{M}+\text{H}]^+$ .  $\text{C}_{12}\text{H}_{12}\text{F}_3\text{NO}$ . Calculated,  $m/z$ : 244.0944.

**(Z)-5-(3-(trifluoromethyl)benzylidene)-2,3-dimethyl-3,5-dihydro-4H-imidazol-4-one**

**(1a)**

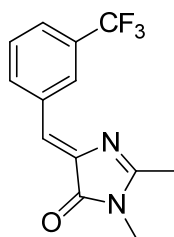

Yield 1150 mg (85%), yellowish solid.

Properties correspond to reported previously<sup>1</sup>

**(Z)-5-(4-fluoro-3-(trifluoromethyl)benzylidene)-2,3-dimethyl-3,5-dihydro-4H-imidazol-4-one (1b)**

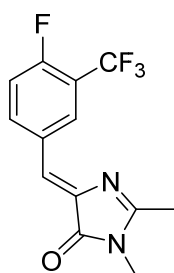

Yield 715 mg (50%), yellowish solid, m.p. 183-186°C.

<sup>1</sup>H NMR (700 MHz, DMSO-*d*<sub>6</sub>),  $\delta$  (ppm): 2.38 (s, 3H), 3.11 (s, 3H), 7.09 (s, 1H), 7.61 (t, *J*=9.7 Hz, 1H), 8.53 - 8.62 (m, 1H), 8.71 (bd, *J*=6.3 Hz, 1H).

<sup>13</sup>C NMR (176 MHz, DMSO-*d*<sub>6</sub>),  $\delta$  (ppm): 15.5 (1C), 26.2 (1C),

117.0 (q, *J*=32.8 Hz, 1C), 117.6 (d, *J*=21.1 Hz, 1C), 121.3 (1C), 122.4 (q, *J*=272.7 Hz, 1C), 130.2 (1C), 130.8 (dq, *J*=270 Hz, *J*=4.2 Hz, 1C), 138.1 (d, *J*=8.7 Hz, 1C), 139.9 (d, *J*=3.0 Hz, 1C), 158.9 (d, *J*=258.0 Hz, 1C), 165.9 (1C), 169.6 (1C).

HRMS found, *m/z*: 287.0800 [M+H]<sup>+</sup>. C<sub>13</sub>H<sub>10</sub>F<sub>4</sub>N<sub>2</sub>O. Calculated, *m/z*: 287.0802.

<sup>1</sup> Anthony Baldrige, Adrian Amador, and Laren M. Tolbert *Langmuir* **2011** 27 (7), 3271-3274

**(Z)-5-(4-hydroxy-3-(trifluoromethyl)benzylidene)-2,3-dimethyl-3,5-dihydro-4H-imidazol-4-one (1c)**

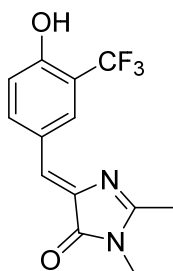

Yield 586 mg (40%), yellow solid, m.p. 216-219°C.

<sup>1</sup>H NMR (700 MHz, DMSO-*d*<sub>6</sub>), δ (ppm): 2.34 (s, 3H), 3.09 (s, 3H), 6.97 (s, 1H), 7.08 (d, *J*=8.6 Hz, 1H), 8.28 (dd, *J*=8.6, 1.5 Hz, 1H), 8.51 (d, *J*=1.3 Hz, 1H), 11.20 (br. s., 1H).

<sup>13</sup>C NMR (176 MHz, DMSO-*d*<sub>6</sub>), δ (ppm): 15.3 (1C), 26.2 (1C), 115.9 (q, *J*=30.5 Hz, 1C), 117.2 (1C), 123.6 (1C), 123.7 (q, *J*=272.4 Hz, 1C), 125.1 (1C), 130.5 (q, *J*=4.7 Hz, 1C), 137.2 (1C), 137.5 (1C), 157.2 (1C), 163.6 (1C), 169.7 (1C).

HRMS found, *m/z*: 285.0851 [M+H]<sup>+</sup>. C<sub>13</sub>H<sub>11</sub>F<sub>3</sub>N<sub>2</sub>O<sub>2</sub>. Calculated, *m/z*: 285.0845.

**(Z)-5-(4-(dimethylamino)-3-(trifluoromethyl)benzylidene)-2,3-dimethyl-3,5-dihydro-4H-imidazol-4-one (1d)**

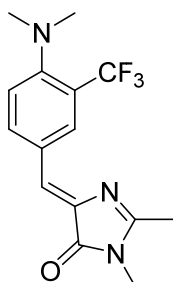

Yield 762 mg (49%), yellow solid, m.p. 152-155°C.

<sup>1</sup>H NMR (700 MHz, DMSO-*d*<sub>6</sub>), δ (ppm): 2.35 (s, 3H), 2.80 (s, 6H), 3.10 (s, 3H), 7.00 (s, 1H), 7.37 (d, *J*=8.8 Hz, 1H), 8.33 (dd, *J*=8.6, 1.7 Hz, 1H), 8.57 (d, *J*=1.9 Hz, 1H).

<sup>13</sup>C NMR (176 MHz, DMSO-*d*<sub>6</sub>), δ (ppm): 15.4 (1C), 26.2 (1C), 44.3 (2C), 120.5 (q, *J*=28.8 Hz, 1C), 121.3 (1C), 123.1 (1C), 124.2 (q, *J*=273.4 Hz, 1C), 127.5 (1C), 131.4 (q, *J*=5.7 Hz), 136.1 (1C), 138.2 (1C), 153.1 (1C), 164.0 (1C), 169.6 (1C).

HRMS found, *m/z*: 312.1327 [M+H]<sup>+</sup>. C<sub>15</sub>H<sub>16</sub>F<sub>3</sub>N<sub>3</sub>O. Calculated, *m/z*: 312.1318.

**(Z)-5-(4-(pyrrolidin-1-yl)-3-(trifluoromethyl)benzylidene)-2,3-dimethyl-3,5-dihydro-4H-imidazol-4-one (1e)**

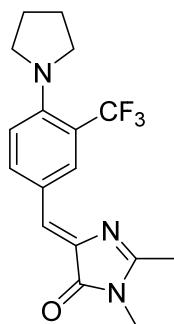

Yield 927 mg (55%), orange solid, m.p. 187-190°C.

Contain 10-15% of E isomer.

<sup>1</sup>H NMR (700 MHz, DMSO-*d*<sub>6</sub>), δ (ppm): 1.92 - 1.94 (m, 4H), 2.33 (s, 3H), 3.09 (s, 3H), 3.40 - 3.43 (m, 4H), 6.95 (s, 1H), 7.02 (d, *J*=9.0 Hz, 1H), 8.25 (dd, *J*=9.0, 1.9 Hz, 1H), 8.50 (d, *J*=1.9 Hz, 1H).

<sup>13</sup>C NMR (176 MHz, DMSO-*d*<sub>6</sub>), δ (ppm): 15.3 (1C), 25.2 (2C), 26.1 (1C), 50.9 (2C), 112.8 (q, *J*=29.8 Hz, 1C), 116.8 (1C), 122.2 (1C), 124.2 (1C), 124.7 (q, *J*=272.1 Hz, 1C), 132.6 (brs, 1C), 135.7 (1C), 136.4 (1C), 147.5 (1C), 162.2 (1C), 169.5 (1C).

HRMS found, *m/z*: 338.1481 [M+H]<sup>+</sup>. C<sub>17</sub>H<sub>18</sub>F<sub>3</sub>N<sub>3</sub>O. Calculated, *m/z*: 338.1475.

**(Z)-5-(3,5-bis(trifluoromethyl)benzylidene)-2,3-dimethyl-3,5-dihydro-4H-imidazol-4-one (1f)**

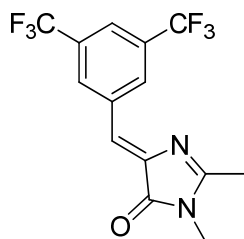

Yield 555 mg (33%), white solid, m.p. 173-176°C.

<sup>1</sup>H NMR (700 MHz, DMSO-*d*<sub>6</sub>), δ (ppm): 2.40 (s, 3H), 3.12 (s, 3H), 7.19 (s, 1H), 8.08 (s, 1H), 8.93 (s, 2H).

<sup>13</sup>C NMR (176 MHz, DMSO-*d*<sub>6</sub>), δ (ppm): 15.6 (1C), 26.3 (1C), 120.3 (1C), 122.1 (brs, 1C), 123.2 (q, *J*=272.7 Hz, 1C), 130.5 (q, *J*=32.5 Hz, 1C), 131.5 (1C), 136.7 (1C), 141.5 (1C), 167.3 (1C), 169.5 (1C).

HRMS found, *m/z*: 337.0779 [M+H]<sup>+</sup>. C<sub>13</sub>H<sub>10</sub>F<sub>4</sub>N<sub>2</sub>O. Calculated, *m/z*: 337.0770.

**(Z)-1,2-dimethyl-4-(3-methylbenzylidene)-1H-imidazol-5(4H)-one (1g)**

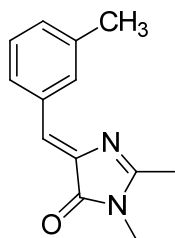

Yellow solid (442 mg, yield 69%).

Properties correspond to reported previously<sup>2</sup>.

<sup>1</sup>H NMR (700 MHz, CDCl<sub>3</sub>) δ ppm 2.39 (s, 3H), 2.40 (s, 3H), 3.19 (s, 3H), 7.09 (s, 1H), 7.19 (d, J=7.5 Hz, 1H), 7.31 (t, J=7.7 Hz, 1H), 7.93 (s, 1H), 7.95 (d, J=7.7 Hz, 1H).

---

<sup>2</sup>Baldrige A., Kowalik J., Tolbert L. M. *Synthesis* **2010**, 14, 2424.

**3-methyl-2-((E)-styryl)-5-((Z)-3-(trifluoromethyl)benzylidene)-3,5-dihydro-4H-imidazol-4-one (2a)**

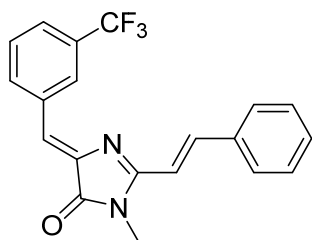

Yield 163 mg (46%), yellow solid, m.p. 138-140°C.

$^1\text{H}$  NMR (700 MHz, DMSO- $d_6$ ),  $\delta$  (ppm): 3.30 (s, 3H), 7.15 (s, 1H), 7.29 (d,  $J=15.6$  Hz, 1H), 7.44 - 7.52 (m, 3H), 7.71 (t,  $J=7.7$  Hz, 1H), 7.73 - 7.78 (m, 1H), 7.86 (d,  $J=7.2$  Hz, 2H), 8.04 (d,  $J=15.8$  Hz, 1H), 8.64 (d,  $J=7.8$  Hz, 1H), 8.70 (s, 1H).

$^{13}\text{C}$  NMR (201 MHz, DMSO- $d_6$ ),  $\delta$  (ppm): 26.4 (1C),

113.8 (1C), 122.4 (1C), 124.0 (q,  $J=272.1$  Hz, 1C), 125.6 (d,  $J=3.3$  Hz, 1C), 128.0 (q,  $J=3.7$  Hz, 1C), 128.4 (1C), 128.9 (1C), 129.4 (q,  $J=31.9$ , 1C), 129.6 (1C), 130.3 (1C), 134.8 (1C), 135.3 (1C), 135.4 (1C), 140.7 (1C), 141.1 (1C), 161.8 (1C), 169.8 (1C).

HRMS found,  $m/z$ : 357.1206  $[\text{M}+\text{H}]^+$ .  $\text{C}_{20}\text{H}_{16}\text{F}_3\text{N}_2\text{O}$ . Calculated,  $m/z$ : 357.1209.

**2-(4-methoxystyryl)-3-methyl-5-((Z)-3-(trifluoromethyl)benzylidene)-3,5-dihydro-4H-imidazol-4-one (2b)**

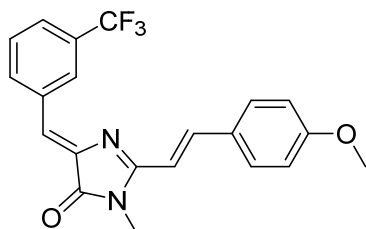

Yield 154 mg (40%), yellow solid, m.p. 153-155°C.

Mixture of E and Z-isomers (styrene fragment, 5:2).

E-isomer:  $^1\text{H}$  NMR (700 MHz, DMSO- $d_6$ ),  $\delta$  (ppm) 3.29 (s, 3H), 3.84 (s, 3H), 7.05 (d,  $J=8.8$  Hz, 2H), 7.09 (s, 1H), 7.12 (d,  $J=15.6$  Hz, 1H), 7.70 (t,  $J=7.7$  Hz, 1H), 7.73 (m, 1H), 7.82 (d,  $J=8.8$  Hz, 2H), 8.01 (d,  $J=15.6$  Hz, 1H), 8.63 (d,  $J=7.6$  Hz, 1H), 8.68 (s, 1H).

Z-isomer:  $^1\text{H}$  NMR (700 MHz, DMSO- $d_6$ ),  $\delta$  (ppm): 3.12 (s, 3H), 3.80 (s, 3H), 6.34 (d,  $J=13.0$  Hz, 1H), 6.94 (d,  $J=9.0$  Hz, 2H), 7.16 (d,  $J=13.0$  Hz, 1H), 7.18 (s, 1H), 7.64 (t,  $J=7.8$  Hz, 1H), 7.74 (m, 1H), 8.04 (d,  $J=8.8$  Hz, 2H), 8.42 (d,  $J=8.0$  Hz, 1H), 8.57 (s, 1H).

$^{13}\text{C}$  NMR (176 MHz, DMSO- $d_6$ ),  $\delta$  (ppm): Spectrum of isomers mixture described as is. 26.4, 55.3, 111.0, 113.4, 114.5, 121.5, 124.1 (d,  $J=272.4$  Hz), 125.5 (d,  $J=4.0$  Hz), 127.6, 128.0 (d,  $J=3.3$  Hz), 129.4 (d,  $J=31.8$  Hz), 129.6, 130.4, 132.5, 135.2, 135.6, 140.9, 141.2, 161.3, 162.1, 169.9. HRMS found,  $m/z$ : 387.1314  $[\text{M}+\text{H}]^+$ .  $\text{C}_{21}\text{H}_{18}\text{F}_3\text{N}_2\text{O}_2$ . Calculated,  $m/z$ : 387.1315.

**3-methyl-2-((E)-2-(pyridin-4-yl)vinyl)-5-((Z)-3-(trifluoromethyl)benzylidene)-3,5-dihydro-4H-imidazol-4-one (2c)**

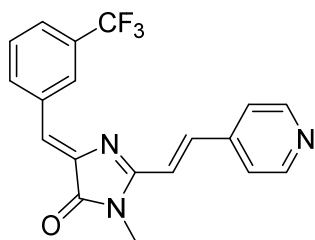

Yield 117 mg (33%), yellow solid, m.p. 170-172°C.

$^1\text{H}$  NMR (700 MHz, DMSO- $d_6$ ),  $\delta$  (ppm): 7.22 (s, 1H), 7.53 (d,  $J=16.0$  Hz, 1H), 7.71 (t,  $J=7.8$  Hz, 1H), 7.75 - 7.78 (m, 1H), 7.80 (d,  $J=5.9$  Hz, 2H), 7.96 (d,  $J=15.8$  Hz, 1H), 8.62 - 8.71 (m, 4H).

$^{13}\text{C}$  NMR (201 MHz, DMSO- $d_6$ ),  $\delta$  (ppm): 26.5 (1C),

118.6 (1C), 122.0 (1C), 123.8 (1C), 123.9 (q,  $J=272.5$ , 1C), 126.0 (q,  $J=3.7$  Hz, 1C), 128.3 (q,  $J=4.0$  Hz, 1C), 129.5 (q,  $J=31.9$  Hz, 1C), 129.7 (1C), 135.2 (1C), 135.5 (1C), 138.2 (1C), 140.5 (1C), 141.7 (1C), 150.3 (1C), 161.3 (1C), 169.7 (1C).

HRMS found,  $m/z$ : 358.1161  $[\text{M}+\text{H}]^+$ .  $\text{C}_{19}\text{H}_{15}\text{F}_3\text{N}_3\text{O}$ . Calculated,  $m/z$ : 358.1162.

**5-((Z)-3,5-bis(trifluoromethyl)benzylidene)-3-methyl-2-((E)-styryl)-3,5-dihydro-4H-imidazol-4-one (2d)**

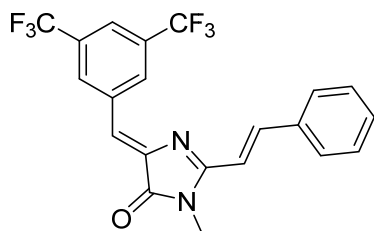

Yield 56 mg (44%), yellow solid, m.p. 221-223°C.

$^1\text{H}$  NMR (700 MHz, DMSO- $d_6$ )  $\delta$  ppm 3.32 (s, 3 H), 7.27 (s, 1 H), 7.33 (d,  $J=15.6$  Hz, 1 H), 7.46 - 7.54 (m, 3 H), 7.82 - 7.85 (m, 2 H), 8.01 (d,  $J=15.6$  Hz, 1 H), 8.11 (s, 1 H), 9.05 (s, 2 H).

$^{13}\text{C}$  NMR (201 MHz, DMSO- $d_6$ )  $\delta$  ppm 26.5 (1C), 113.6 (1C), 120.1 (1C), 123.2 (q,  $J=272.9$ , 2C), 121.9 (br.s, 1C), 128.5 (2C), 129.0 (2C), 130.5 (q,  $J=32.6$ , 2C), 130.6 (1C), 131.6 (br. 2 C), 134.6 (s, 1C), 137.1 (s, 1C), 141.7 (1C), 141.9 (s, 1C), 162.9 (1C), 169.7 (1C)

HRMS (ESI)  $m/z$ : 425.1079 found (calcd for  $\text{C}_{21}\text{H}_{15}\text{F}_6\text{N}_2\text{O}^+$ ,  $[\text{M}+\text{H}]^+$  425.1083).

**5-((Z)-3,5-bis(trifluoromethyl)benzylidene)-2-((E)-4-methoxystyryl)-3-methyl-3,5-dihydro-4H-imidazol-4-one (2e)**

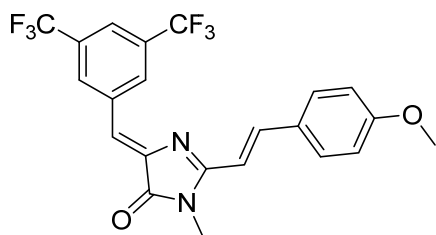

Yield 94 mg (70%), orange solid, m.p. 230-232°C

Mixture of E and Z-isomers (styrene fragment, 3:2).

(E-isomer)  $^1\text{H}$  NMR (700 MHz, DMSO- $d_6$ )  $\delta$  ppm 3.28 (s, 3 H), 3.84 (s, 3 H), 7.05 (d,  $J=8.4$  Hz, 2 H), 7.13 (d,  $J=15.6$  Hz, 1 H), 7.17 (s, 1 H), 7.76 (d,  $J=8.4$  Hz, 2 H), 7.95 (d,  $J=15.6$  Hz, 1 H), 8.04 (br. s., 1 H), 9.01 (br. s., 2 H)

(Z-isomer)  $^1\text{H}$  NMR (700 MHz, DMSO- $d_6$ )  $\delta$  ppm 3.13 (s, 3H), 3.76 (s, 3H), 6.32 (d,  $J=13.0$  Hz, 1H), 6.89 (m,  $J=8.6$  Hz, 2H), 7.16 (d,  $J=13.0$  Hz 1 H), 7.27 (s, 1H), 7.99 (m,  $J=8.8$  Hz, 2 H), 8.04 (br. s., 1H), 8.83 (br. s., 2H)

(E-isomer)  $^{13}\text{C}$  NMR (201 MHz, DMSO- $d_6$ )  $\delta$  ppm 26.8 (1C), 55.0 (1C), 111.8 (1C), 113.5 (2 C), 121.0 (1C), 123.1 (q,  $J=273.2$ , 2 C), 121.8 (br. s., 1C), 127.6 (1C), 130.6 (q,  $J=33.0$ , 2 C), 131.3 (br. s., 2 C), 132.4 (2 C), 136.8 (1C), 141.8 (br. s., 1C), 143.2 (1C), 160.6 (1C), 162.7(1C), 169.4 (1C)

(Z-isomer)  $^{13}\text{C}$  NMR (201 MHz, DMSO- $d_6$ )  $\delta$  ppm 26.5 (1C), 55.4 (1C), 110.9 (s., 1C), 114.6 (2 C), 119.2 (s., 1C), 123.3 (q,  $J=273.3$ , 2 C), 122.4 (br. s., 1C), 127.4 (1C), 130.6 (q,  $J=33.0$ , 2 C), 131.5 (br. s., 2 C), 132.4 (2 C), 137.3 (1C), 141.7 (1C), 142.1 (1C), 161.5 (1C), 163.3 (s., 1C), 169.8 (1C)

HRMS (ESI) m/z: 455.1187 found (calcd for  $\text{C}_{22}\text{H}_{17}\text{F}_6\text{N}_2\text{O}_2^+$ ,  $[\text{M}+\text{H}]^+$  455.1189).

**5-((Z)-3,5-bis(trifluoromethyl)benzylidene)-3-methyl-2-((E)-2-(pyridin-4-yl)vinyl)-3,5-dihydro-4H-imidazol-4-one (2f)**

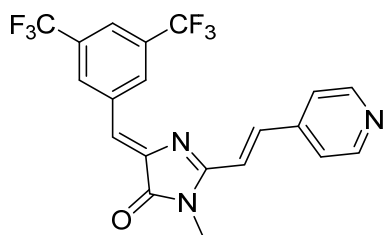

Yield 17 mg (13%), white solid, m.p. 245-247°C

$^1\text{H}$  NMR (700 MHz, DMSO- $d_6$ )  $\delta$  ppm 3.32 (s, 3H), 7.35 (s, 1H), 7.58 (d,  $J=15.8$  Hz, 1H), 7.79 (dd,  $J=4.7, 1.2$  Hz, 2H), 7.91 (d,  $J=15.8$  Hz, 1H), 8.13 (s, 1H), 8.70 (d,  $J=5.9$  Hz, 2H), 9.04 (d,  $J=0.6$  Hz, 2H)

$^{13}\text{C}$  NMR (201 MHz, DMSO- $d_6$ )  $\delta$  ppm 26.7 (1C), 118.7 (1C), 123.2 (q,  $J=272.9$ , 2 C), 121.7 (1C), 122.1 (2 C), 122.4 (br. s., 1C), 130.7 (q,  $J=33.0$ , 2 C), 131.8 (br. s., 2C), 136.9 (1C), 138.7 (1C), 141.6 (1C), 141.7 (1C), 150.5 (2 C), 162.5 (1C), 169.7 (1C)

HRMS (ESI)  $m/z$ : 426.1036 found (calcd for  $\text{C}_{20}\text{H}_{13}\text{F}_6\text{N}_3\text{O}^+$ ,  $[\text{M}+\text{H}]^+$  426.1035).

**(Z)-2-(3-(trifluoromethyl)benzylidene)imidazo[1,2-a]pyridin-3(2H)-one (3)**

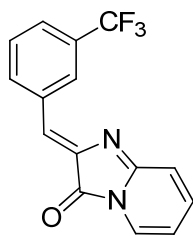

Yield 99 mg (17%), red solid, m.p. 175-178°C.

$^1\text{H}$  NMR (700 MHz, DMSO- $d_6$ ),  $\delta$  (ppm) :6.43 (t,  $J=6.6$  Hz, 1H), 7.04 (d,  $J=9.3$  Hz, 1H), 7.30 (s, 1H), 7.40 (ddd,  $J=9.3, 6.3, 1.1$  Hz, 1H), 7.70 (t,  $J=7.8$  Hz, 1H), 7.73 - 7.76 (m, 1H), 7.78 (d,  $J=6.9$  Hz, 1H), 8.54 (d,  $J=7.8$  Hz, 1H), 8.74 (s, 1H).

$^{13}\text{C}$  NMR (176 MHz, DMSO- $d_6$ ),  $\delta$  (ppm): 109.9 (1C), 118.5 (1C), 123.7 (1C), 124.0 (q,  $J=272.4$ , 1C), 125.9 (q,  $J=3.7$  Hz, 1C), 126.6 (1C), 128.1 (q,  $J=3.3$  Hz, 1C), 129.5 (q,  $J=31.5$  Hz, 1C), 129.7 (1C), 135.6 (1C), 135.7 (1C), 139.6 (1C), 139.9 (1C), 157.5 (1C), 167.0 (1C).

HRMS found,  $m/z$ : 291.0741  $[\text{M}+\text{H}]^+$ .  $\text{C}_{15}\text{H}_{10}\text{F}_3\text{N}_2\text{O}$ . Calculated,  $m/z$ : 291.0740.

## 2. Solvatochromic properties

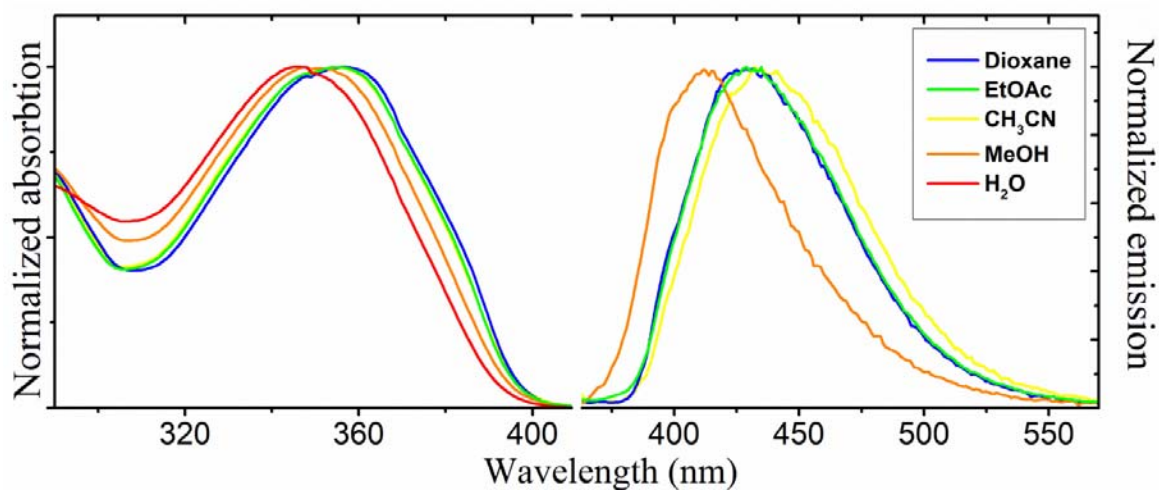

**Fig. S1.** Fluorescence and absorption spectra of **1a** in various solvents.

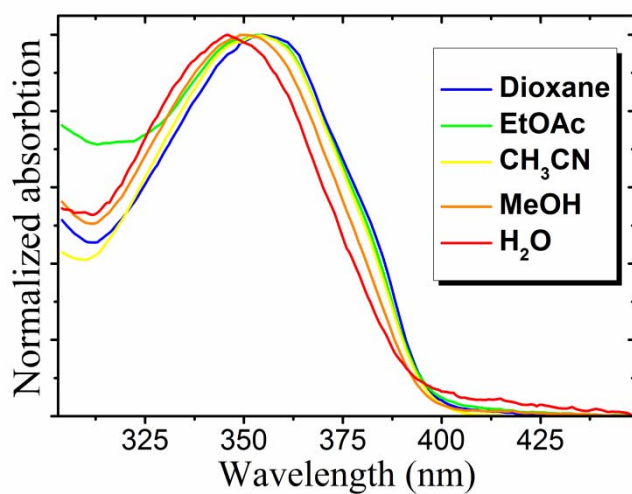

**Fig. S2.** Absorption spectra of **1b** in various solvents.

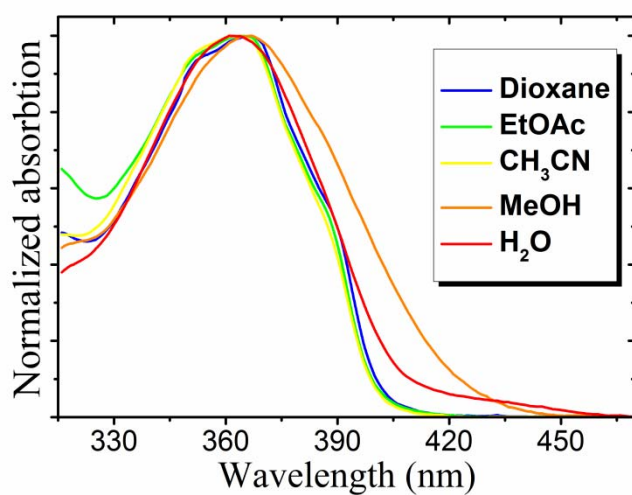

**Fig. S3.** Absorption spectra of **1c** in various solvents.

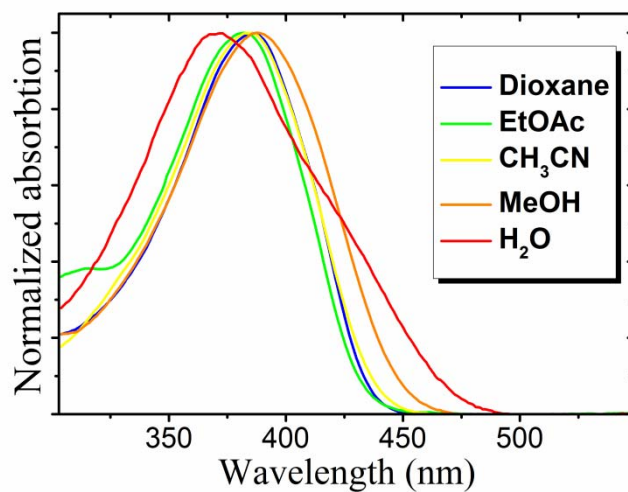

**Fig. S4.** Absorption spectra of **1d** in various solvents.

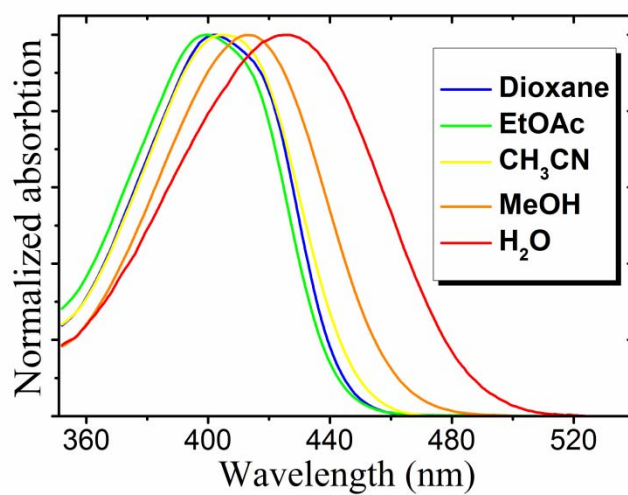

**Fig. S5.** Absorption spectra of **1e** in various solvents.

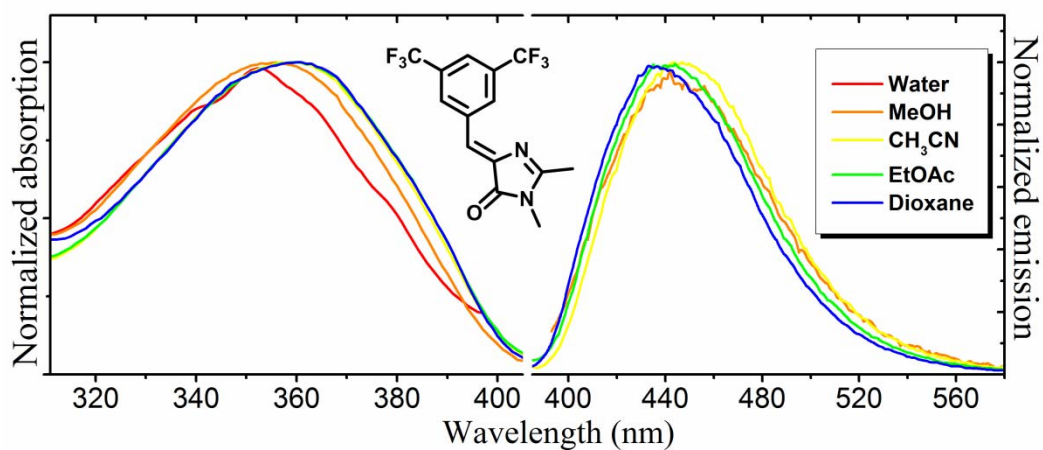

**Fig. S6.** Fluorescence and absorption spectra of **1f** in various solvents.

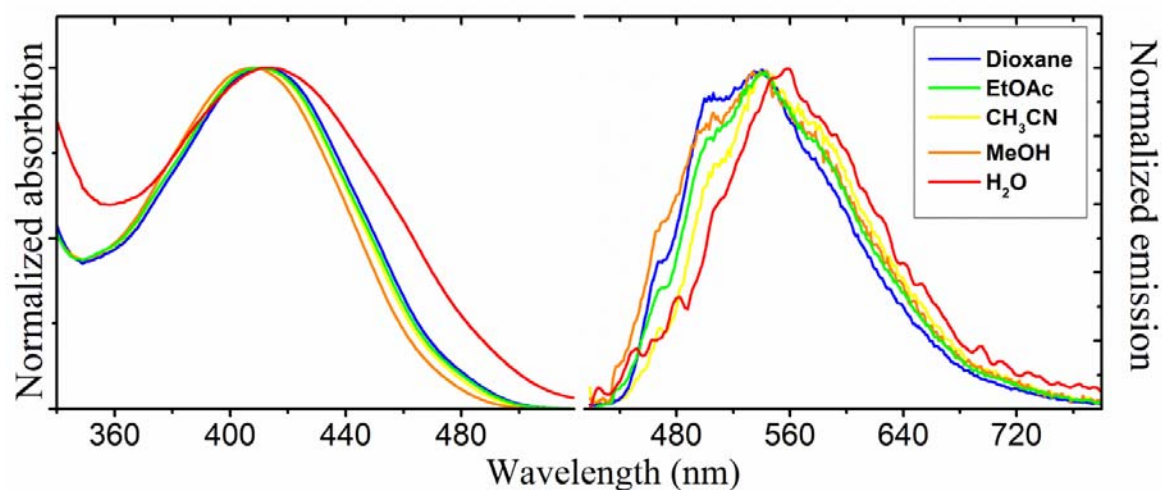

**Fig. S7.** Fluorescence and absorption spectra of **2a** in various solvents.

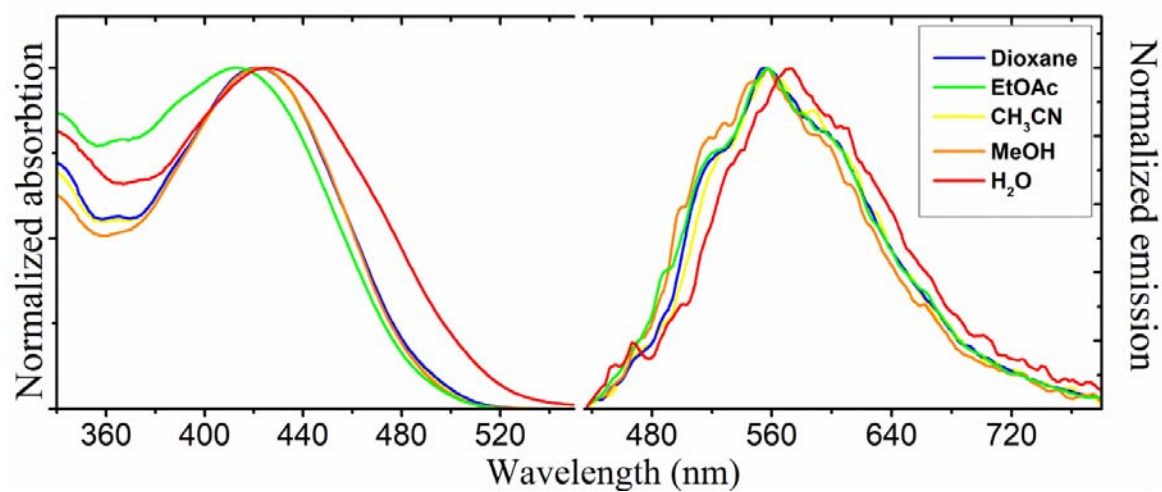

**Fig. S8.** Fluorescence and absorption spectra of **2b** in various solvents.

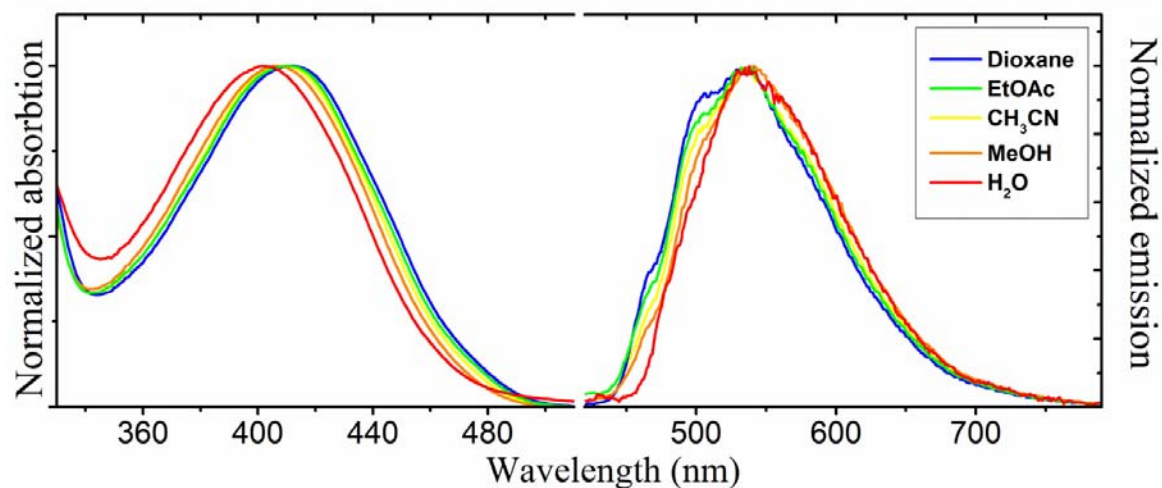

**Fig. S9.** Fluorescence and absorption spectra of **2c** in various solvents.

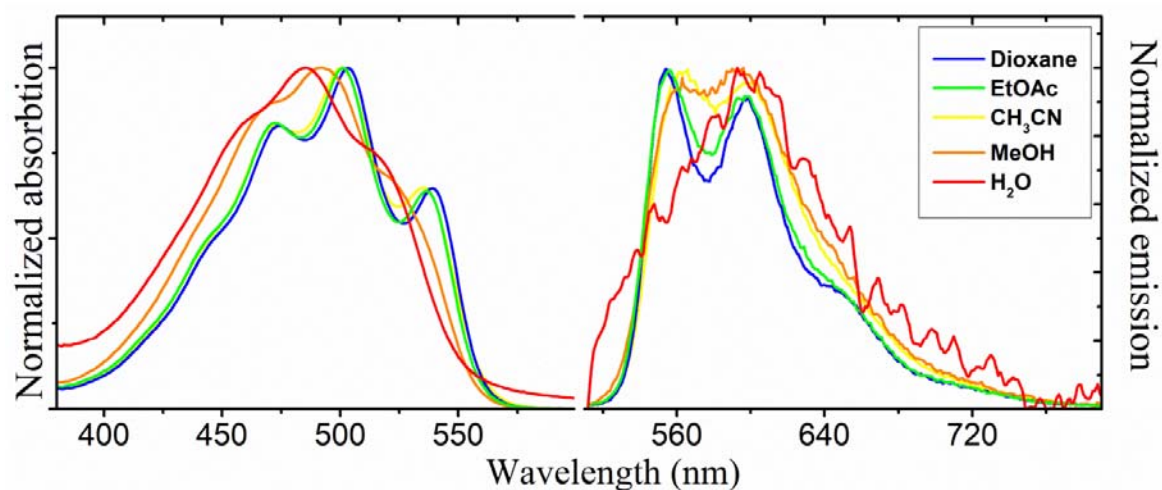

**Fig. S10.** Fluorescence and absorption spectra of **3** in various solvents.

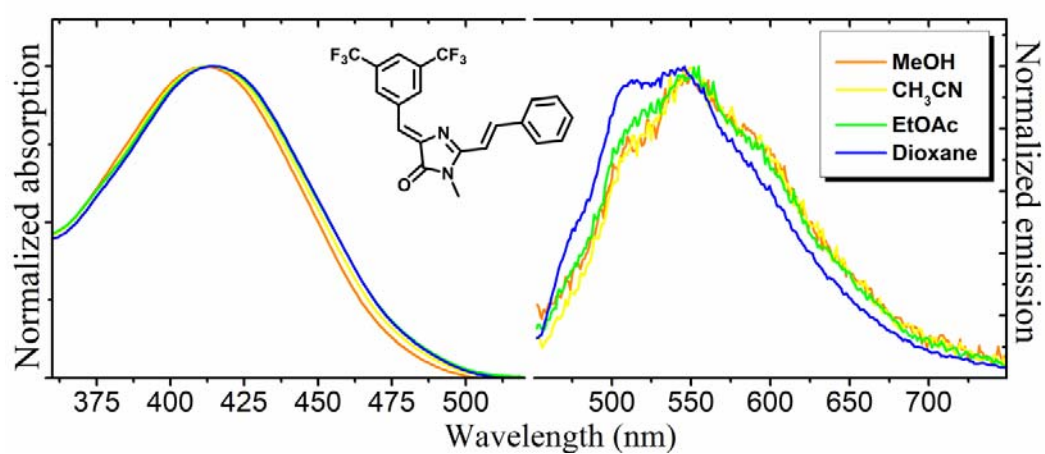

**Figure S11.** Fluorescence and absorption spectra of **2d** in various solvents.

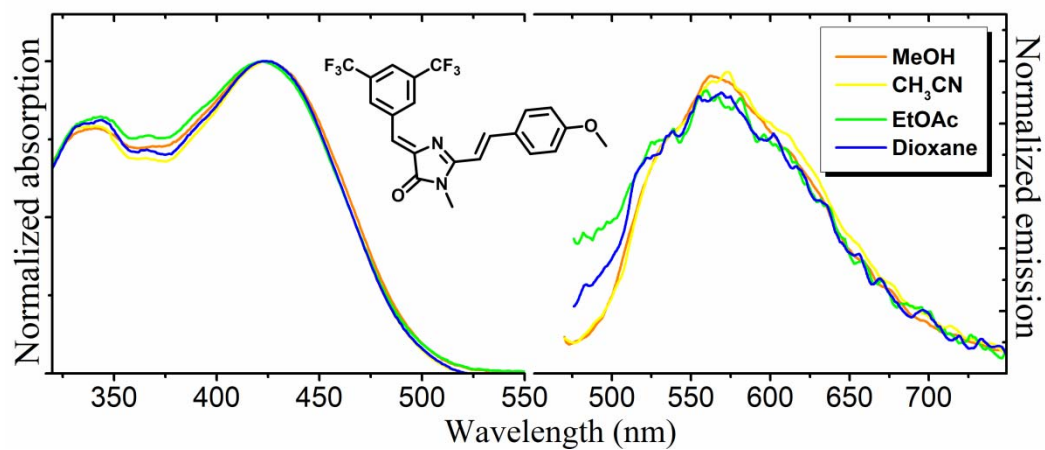

**Figure S12.** Fluorescence and absorption spectra of **2e** in various solvents.

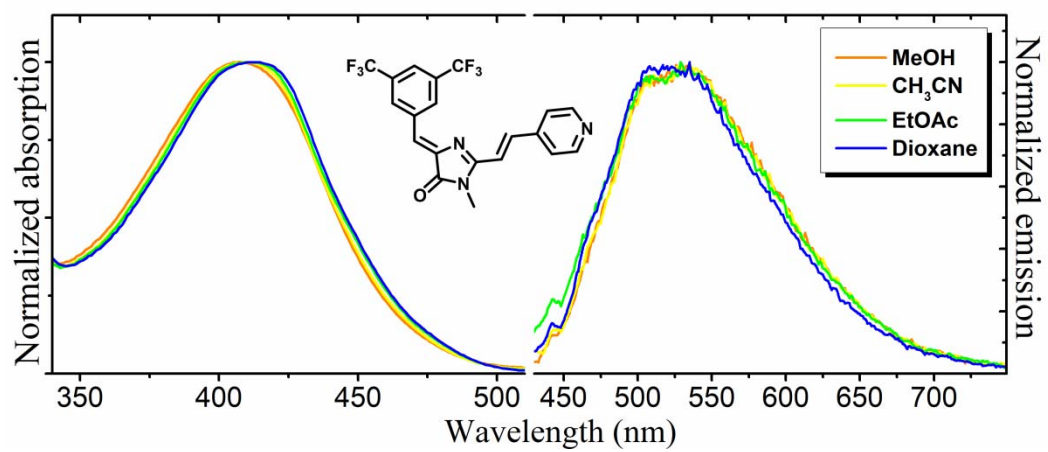

**Figure S13.** Fluorescence and absorption spectra of **2f** in various solvents.

### 3. Solid-state and aggregation-induced emission

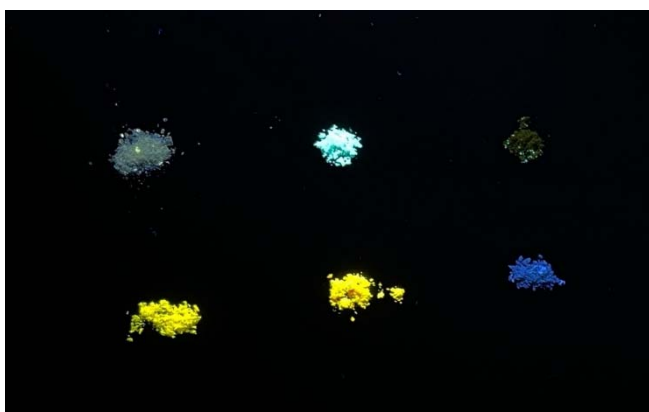

**Figure S14.** Photograph of samples of compounds **1** in solid form upon irradiation with 365 nm light. Top – **1a**, **1b**, and **1c**. Bottom – **1d**, **1e** and **1f**.

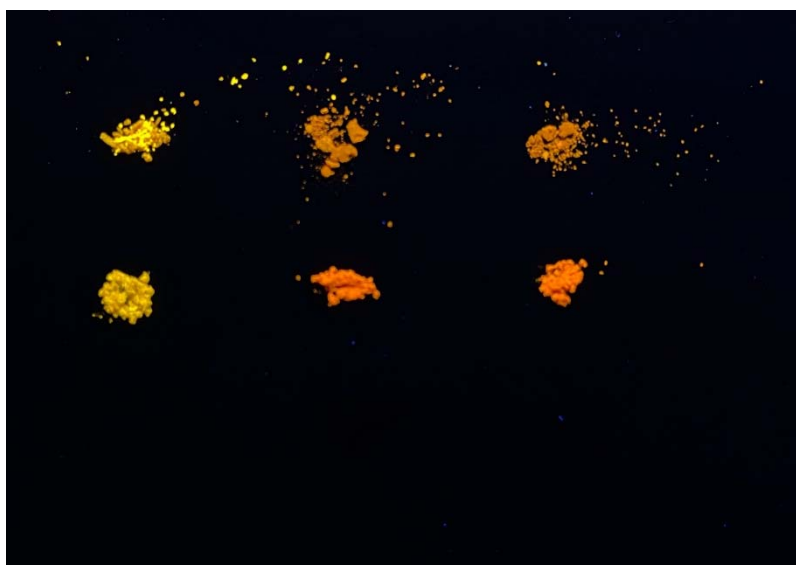

**Figure S15.** Photograph of samples of compounds **2** and **3** in solid form upon irradiation with 365 nm light. Top – **2a**, **2b**, and **2c**. Middle – **2e**, **2f**, and **2g**. Bottom – **3** (non fluorescent).

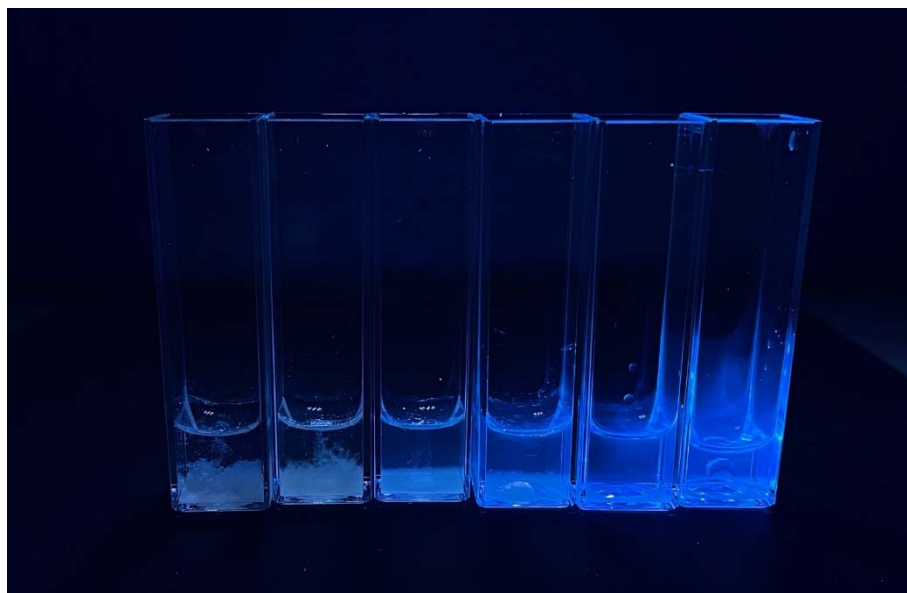

**Figure S16.** Photograph of compound **1a** dripped from DMSO stock solution to various acetone–water mixtures containing different volume fractions of water upon irradiation with 365 nm light. From left to right – 100, 90, 80, 70, 60 and 50% of water.

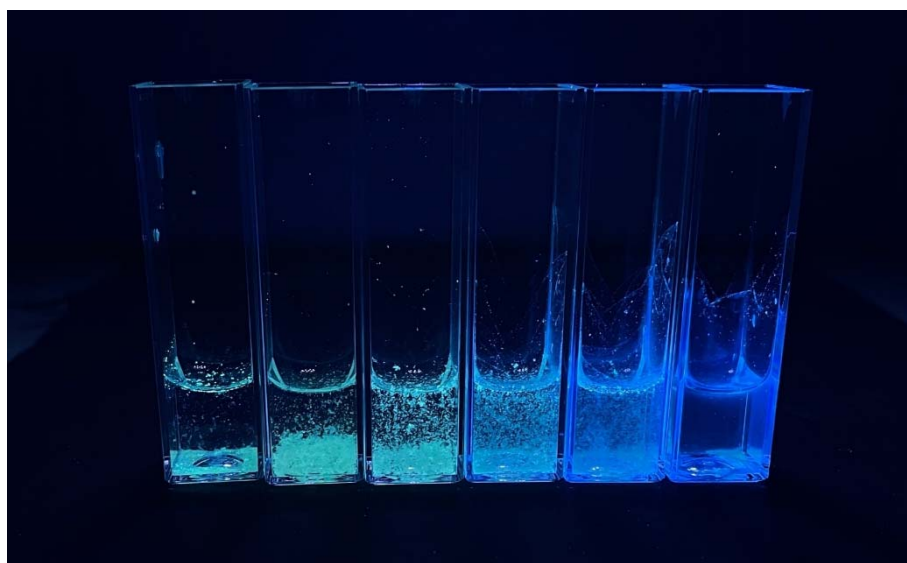

**Figure S17.** Photograph of compound **1b** dripped from DMSO stock solution to various acetone–water mixtures containing different volume fractions of water upon irradiation with 365 nm light. From left to right – 100, 90, 80, 70, 60 and 50% of water.

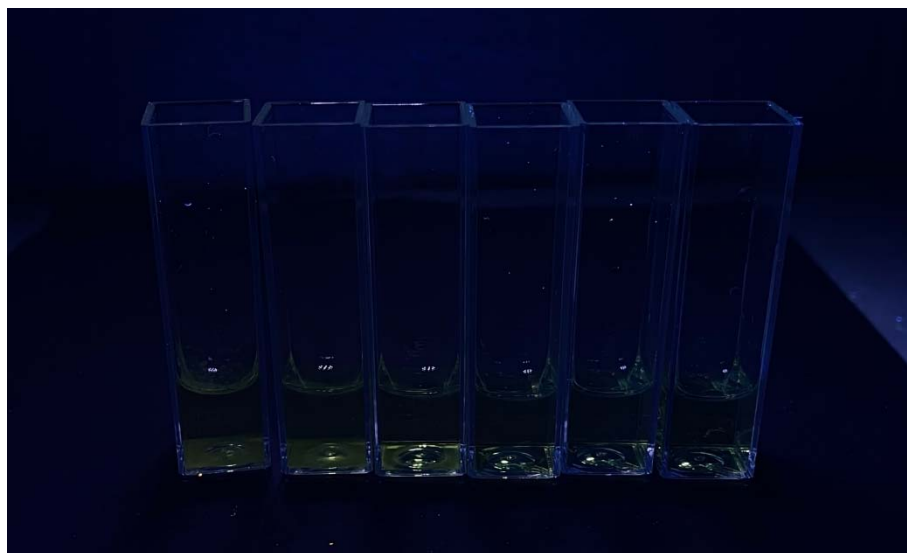

**Figure S18.** Photograph of compound **1c** dripped from DMSO stock solution to various acetone–water mixtures containing different volume fractions of water upon irradiation with 365 nm light. From left to right – 100, 90, 80, 70, 60 and 50% of water.

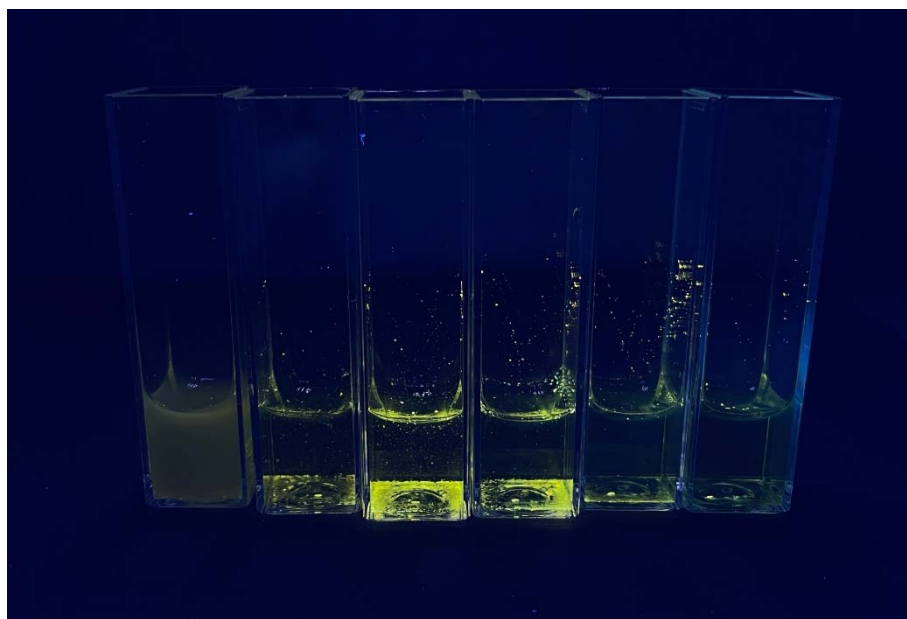

**Figure S19.** Photograph of compound **1d** dripped from DMSO stock solution to various acetone–water mixtures containing different volume fractions of water upon irradiation with 365 nm light. From left to right – 100, 90, 80, 70, 60 and 50% of water.

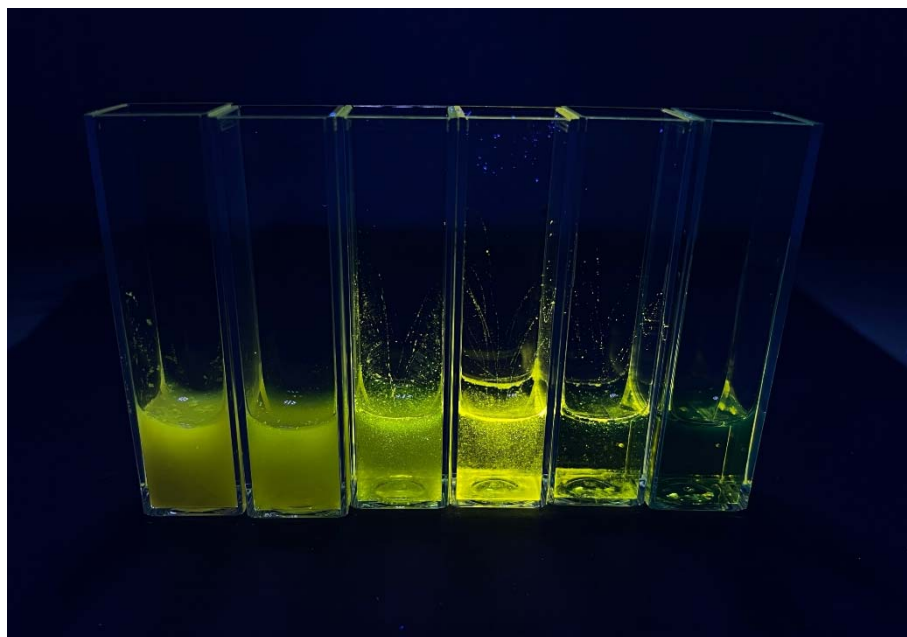

**Figure S20.** Photograph of compound **1e** dripped from DMSO stock solution to various acetone–water mixtures containing different volume fractions of water upon irradiation with 365 nm light. From left to right – 100, 90, 80, 70, 60 and 50% of water.

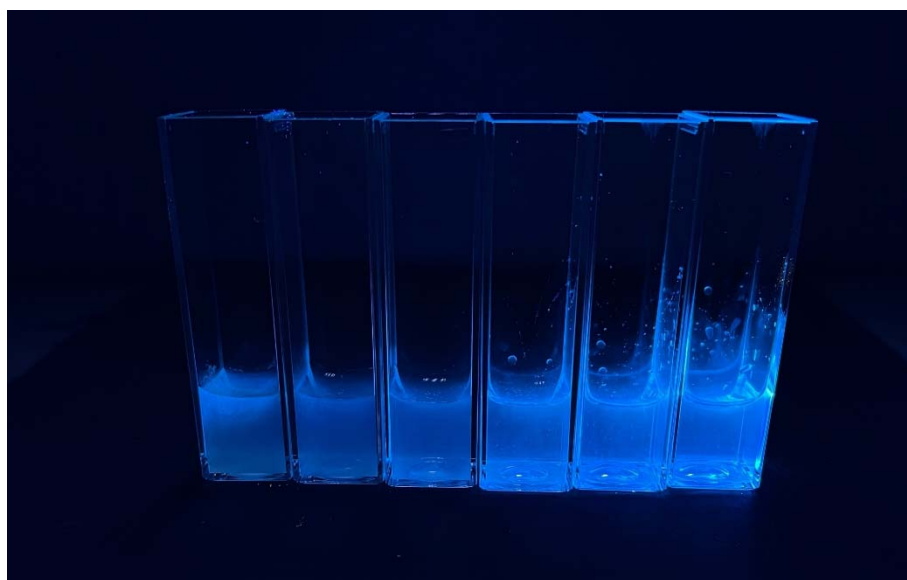

**Figure S21.** Photograph of compound **1f** dripped from DMSO stock solution to various acetone–water mixtures containing different volume fractions of water upon irradiation with 365 nm light. From left to right – 100, 90, 80, 70, 60 and 50% of water.

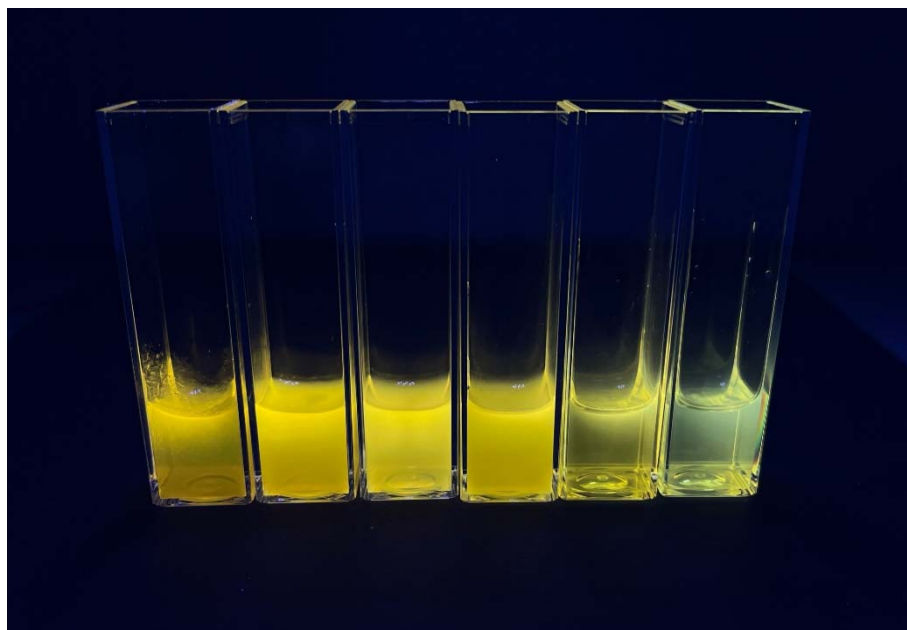

**Figure S22.** Photograph of compound **2a** dripped from DMSO stock solution to various acetone–water mixtures containing different volume fractions of water upon irradiation with 365 nm light. From left to right – 100, 90, 80, 70, 60 and 50% of water.

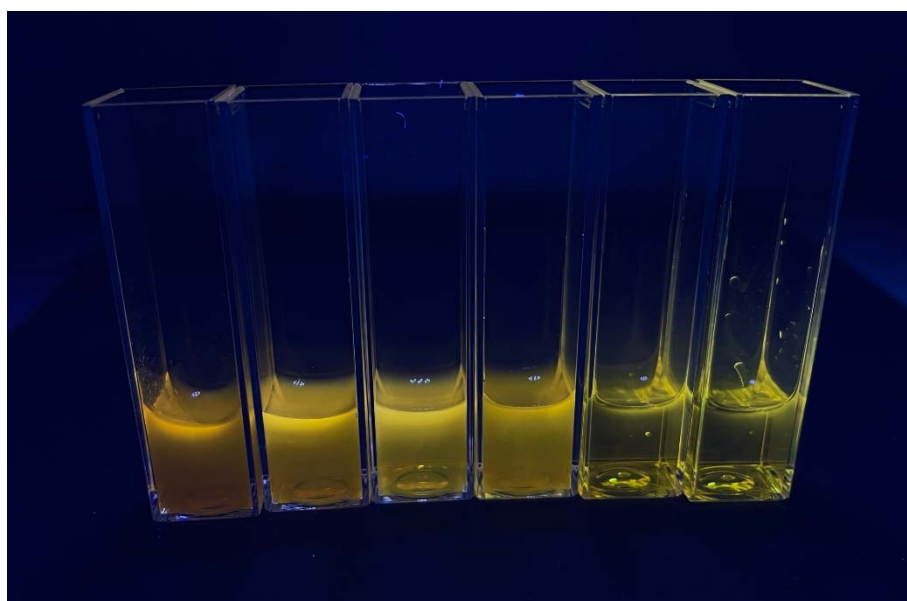

**Figure S23.** Photograph of compound **2b** dripped from DMSO stock solution to various acetone–water mixtures containing different volume fractions of water upon irradiation with 365 nm light. From left to right – 100, 90, 80, 70, 60 and 50% of water.

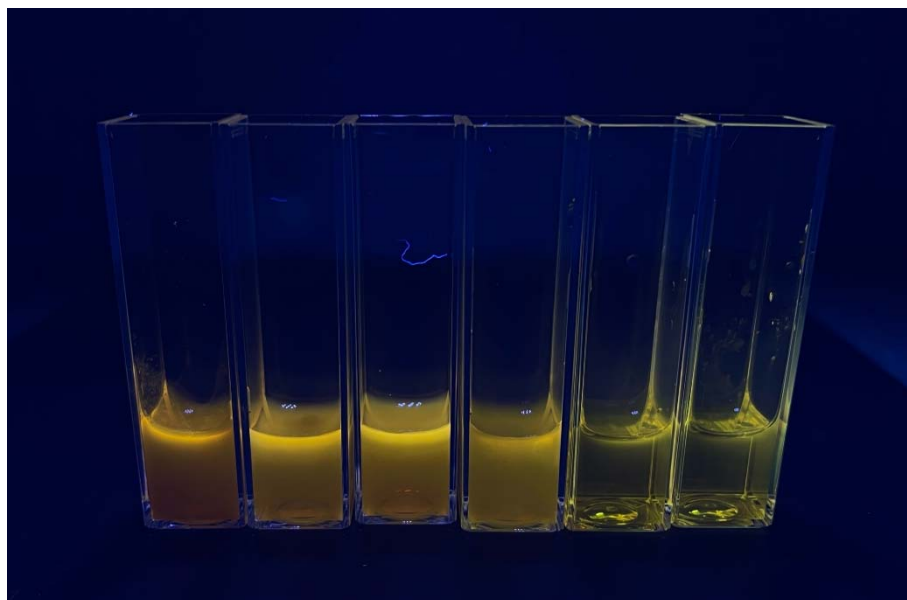

**Figure S24.** Photograph of compound **2c** dripped from DMSO stock solution to various acetone–water mixtures containing different volume fractions of water upon irradiation with 365 nm light. From left to right – 100, 90, 80, 70, 60 and 50% of water.

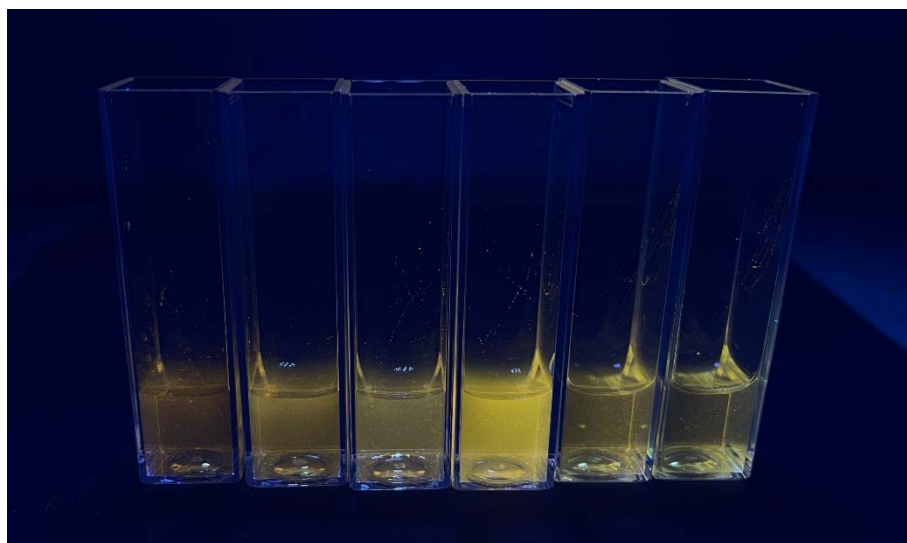

**Figure S25.** Photograph of compound **2d** dripped from DMSO stock solution to various acetone–water mixtures containing different volume fractions of water upon irradiation with 365 nm light. From left to right – 100, 90, 80, 70, 60 and 50% of water.

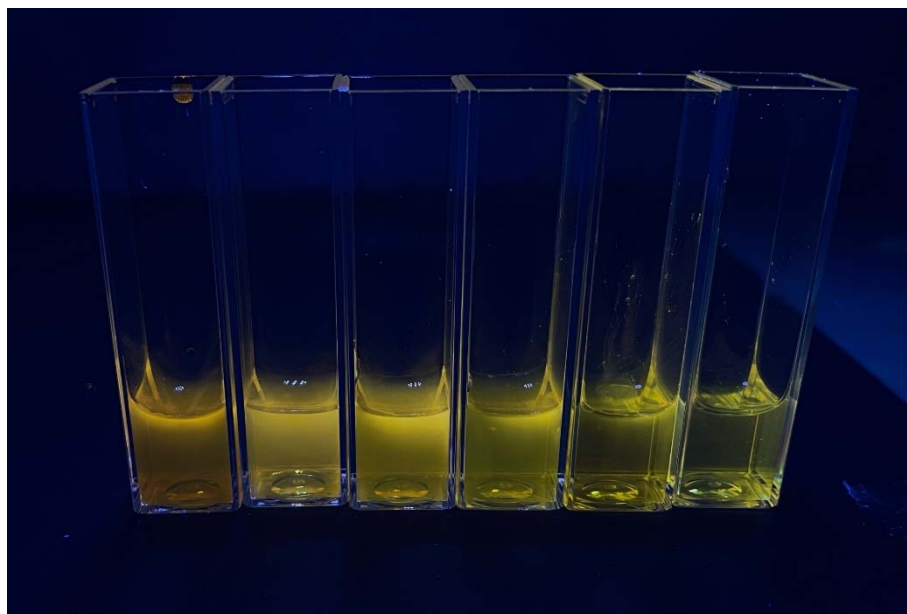

**Figure S26.** Photograph of compound **2e** dripped from DMSO stock solution to various acetone–water mixtures containing different volume fractions of water upon irradiation with 365 nm light. From left to right – 100, 90, 80, 70, 60 and 50% of water.

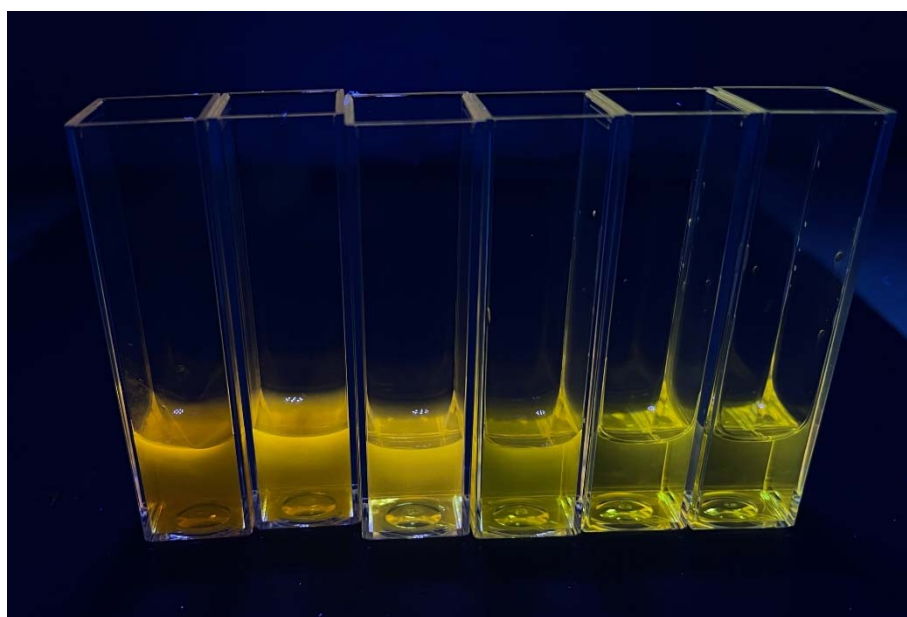

**Figure S27.** Photograph of compound **2f** dripped from DMSO stock solution to various acetone–water mixtures containing different volume fractions of water upon irradiation with 365 nm light. From left to right – 100, 90, 80, 70, 60 and 50% of water.

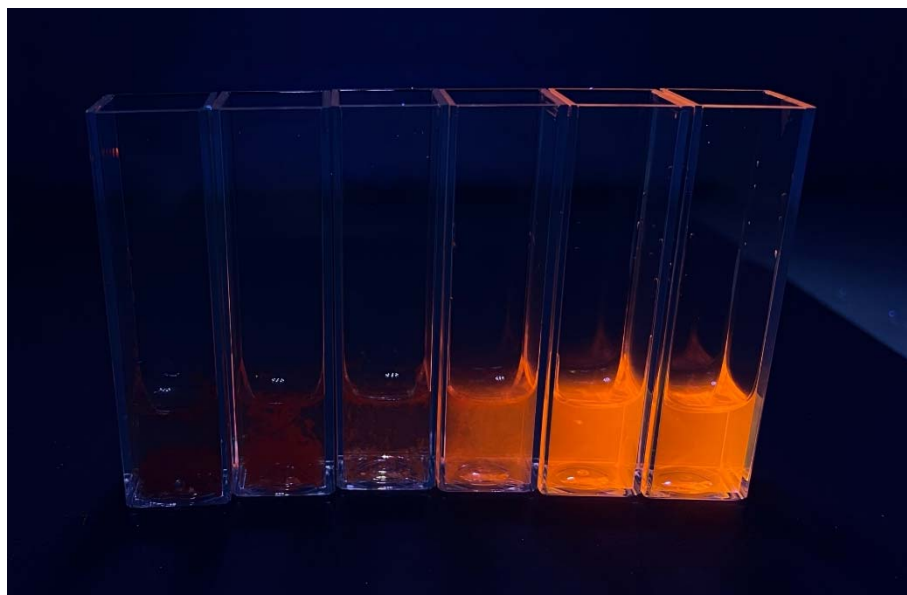

**Figure S28.** Photograph of compound **3** dripped from DMSO stock solution to various acetone–water mixtures containing different volume fractions of water upon irradiation with 365 nm light. From left to right – 100, 90, 80, 70, 60 and 50% of water.

#### 4. Copies of $^1\text{H}$ and $^{13}\text{C}$ NMR spectra

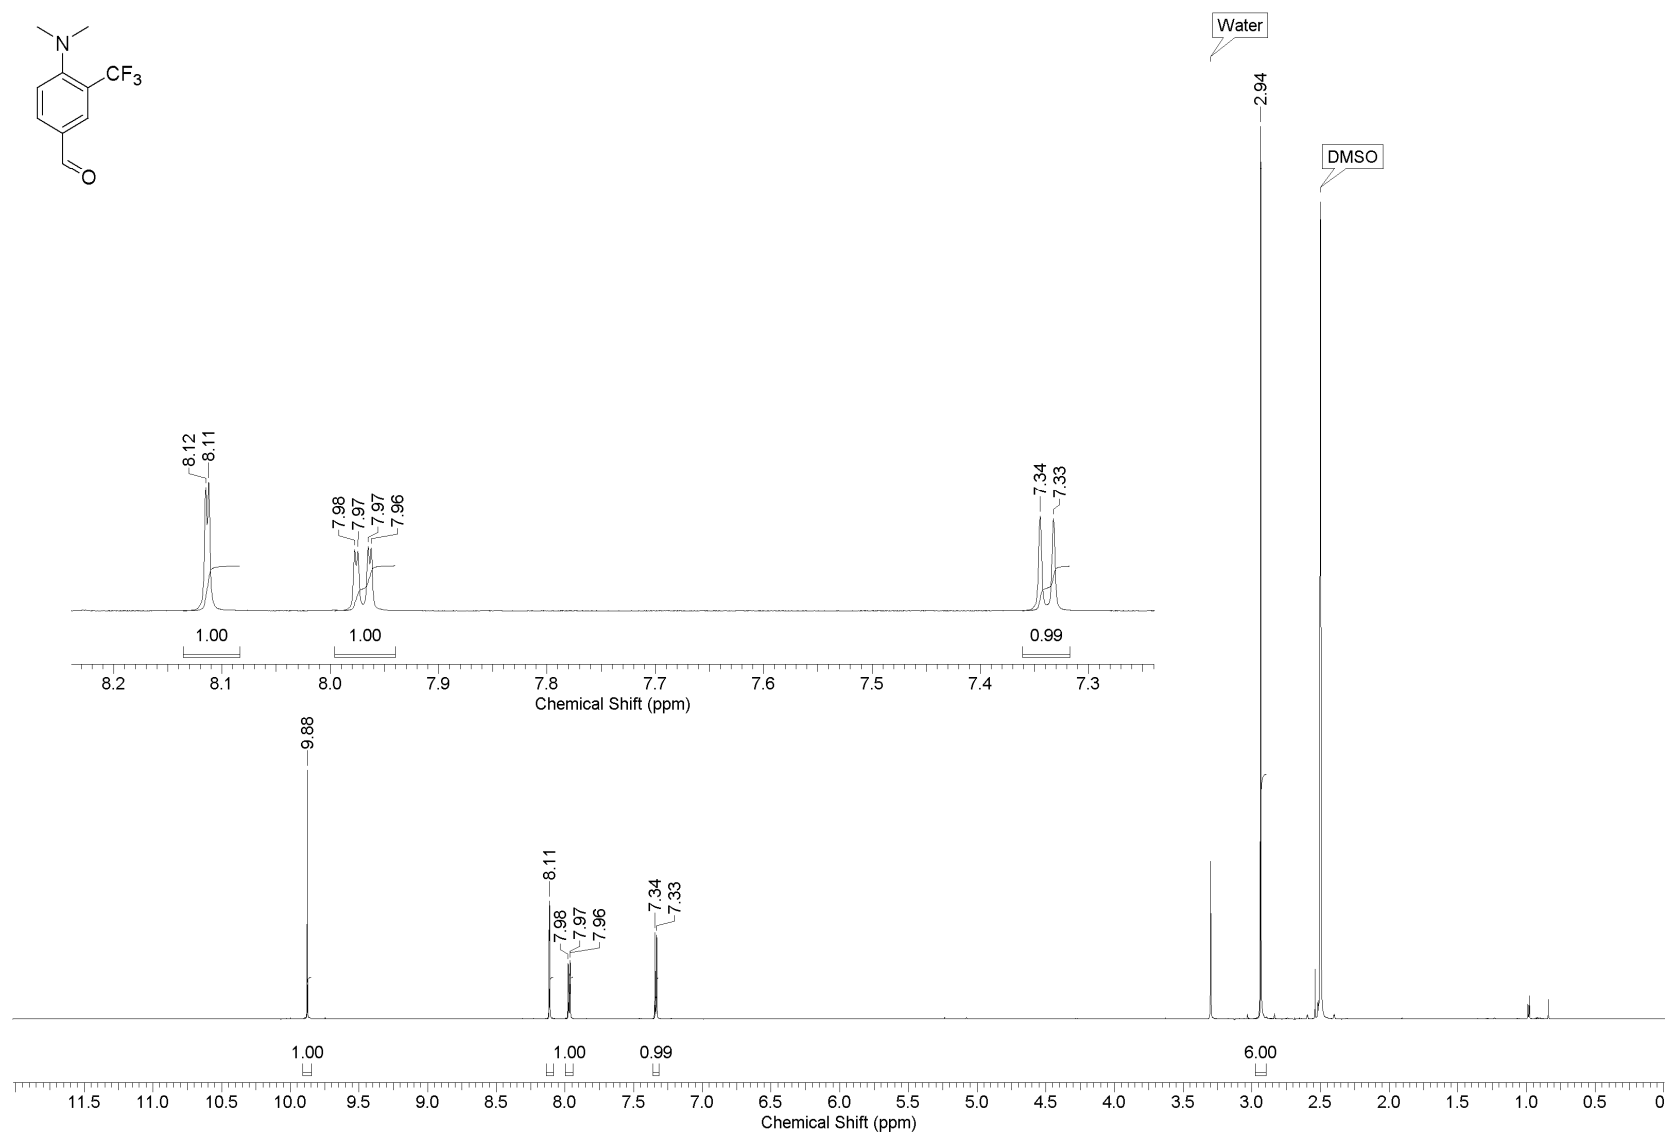

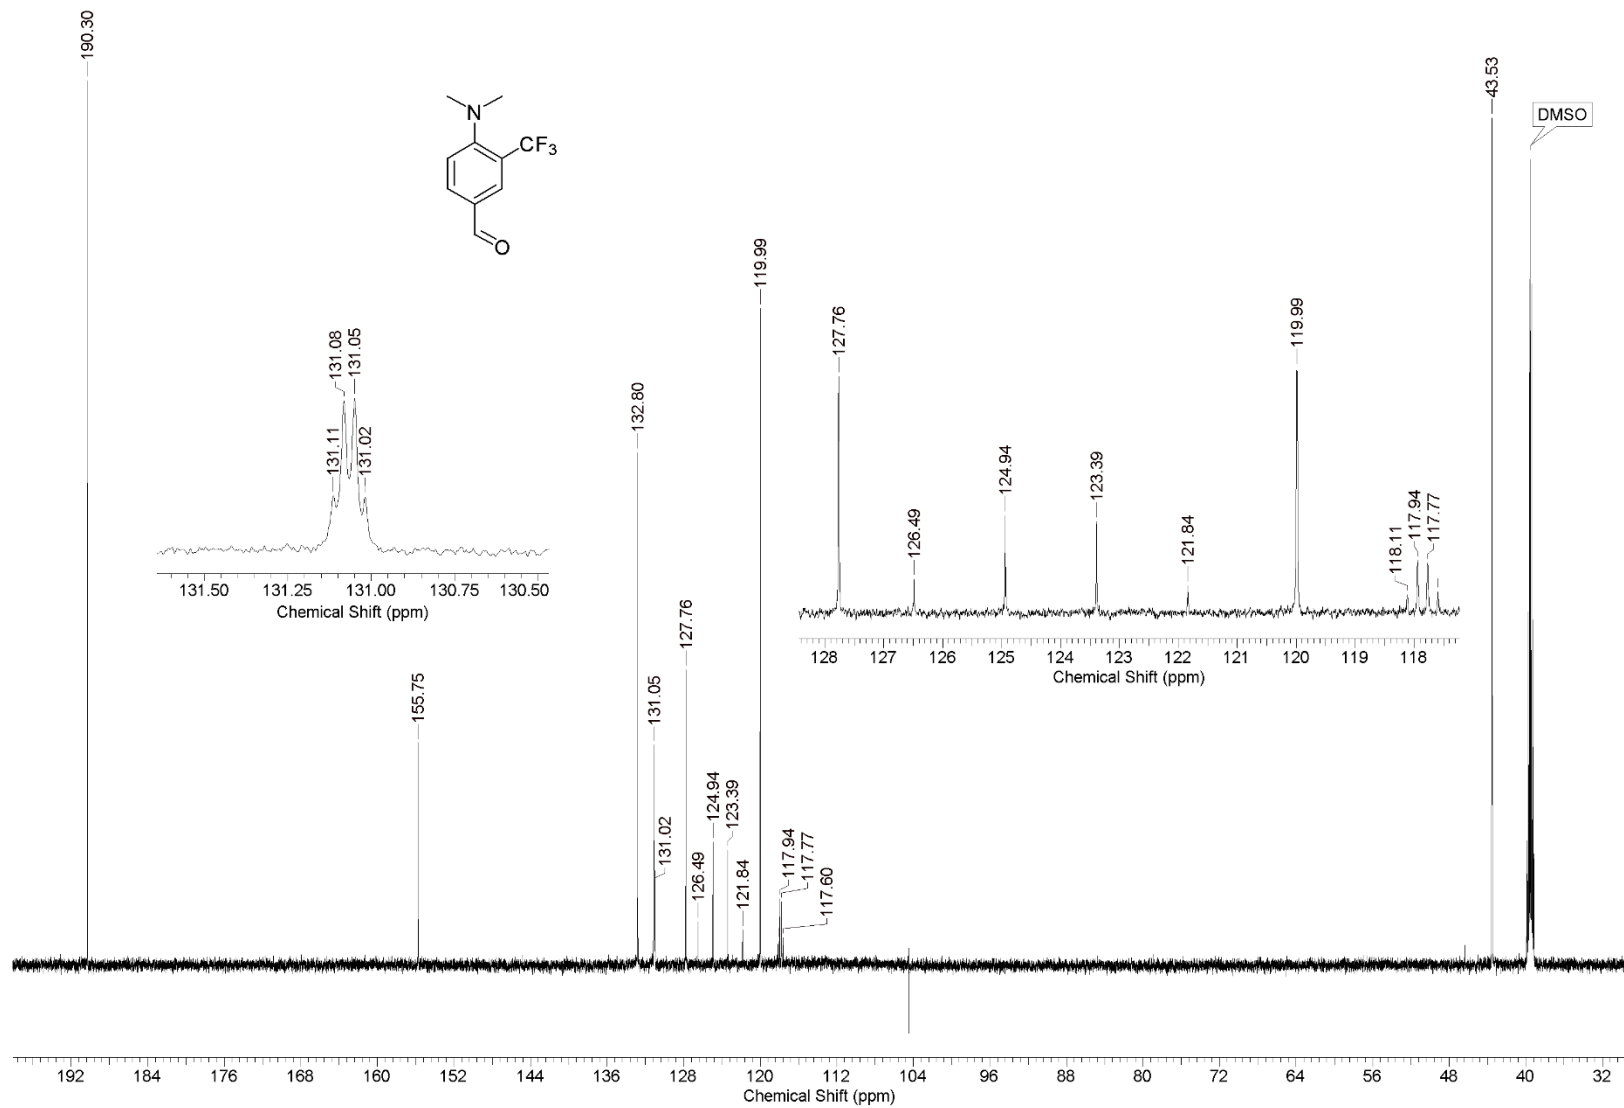

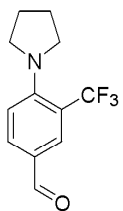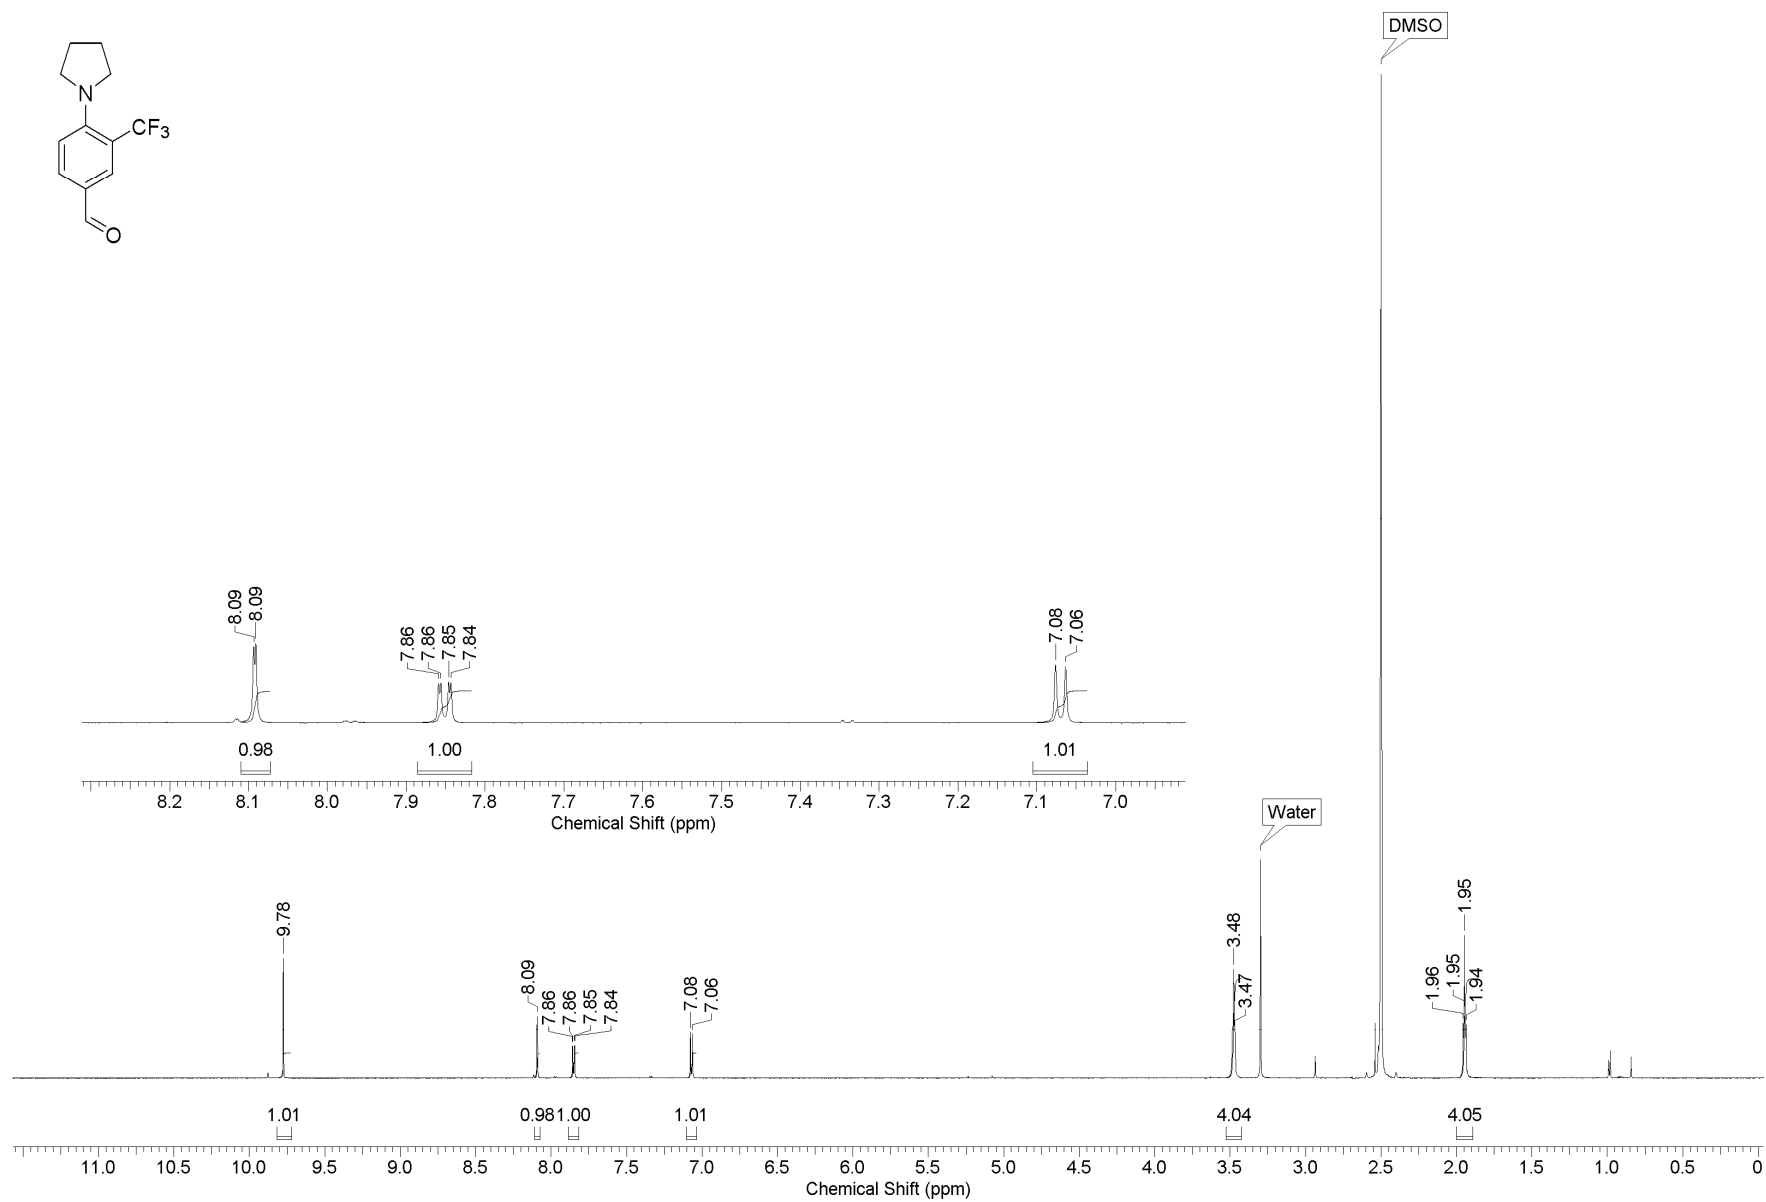

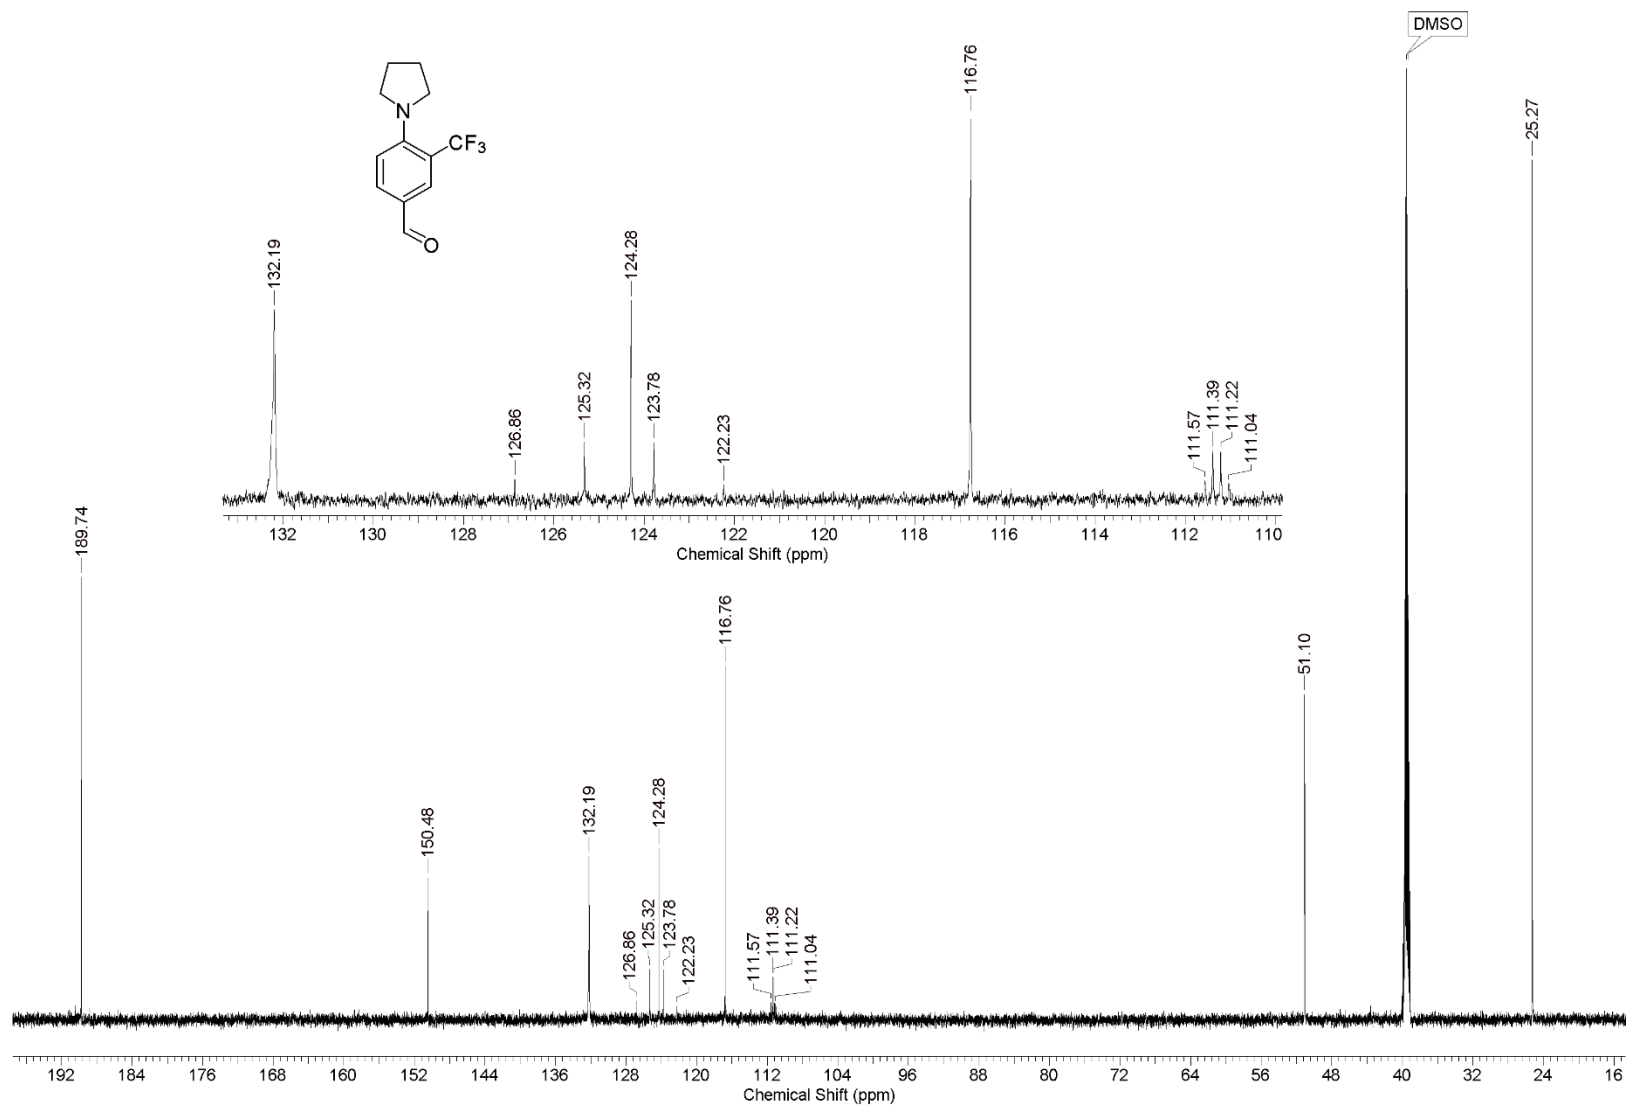

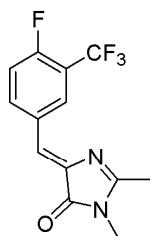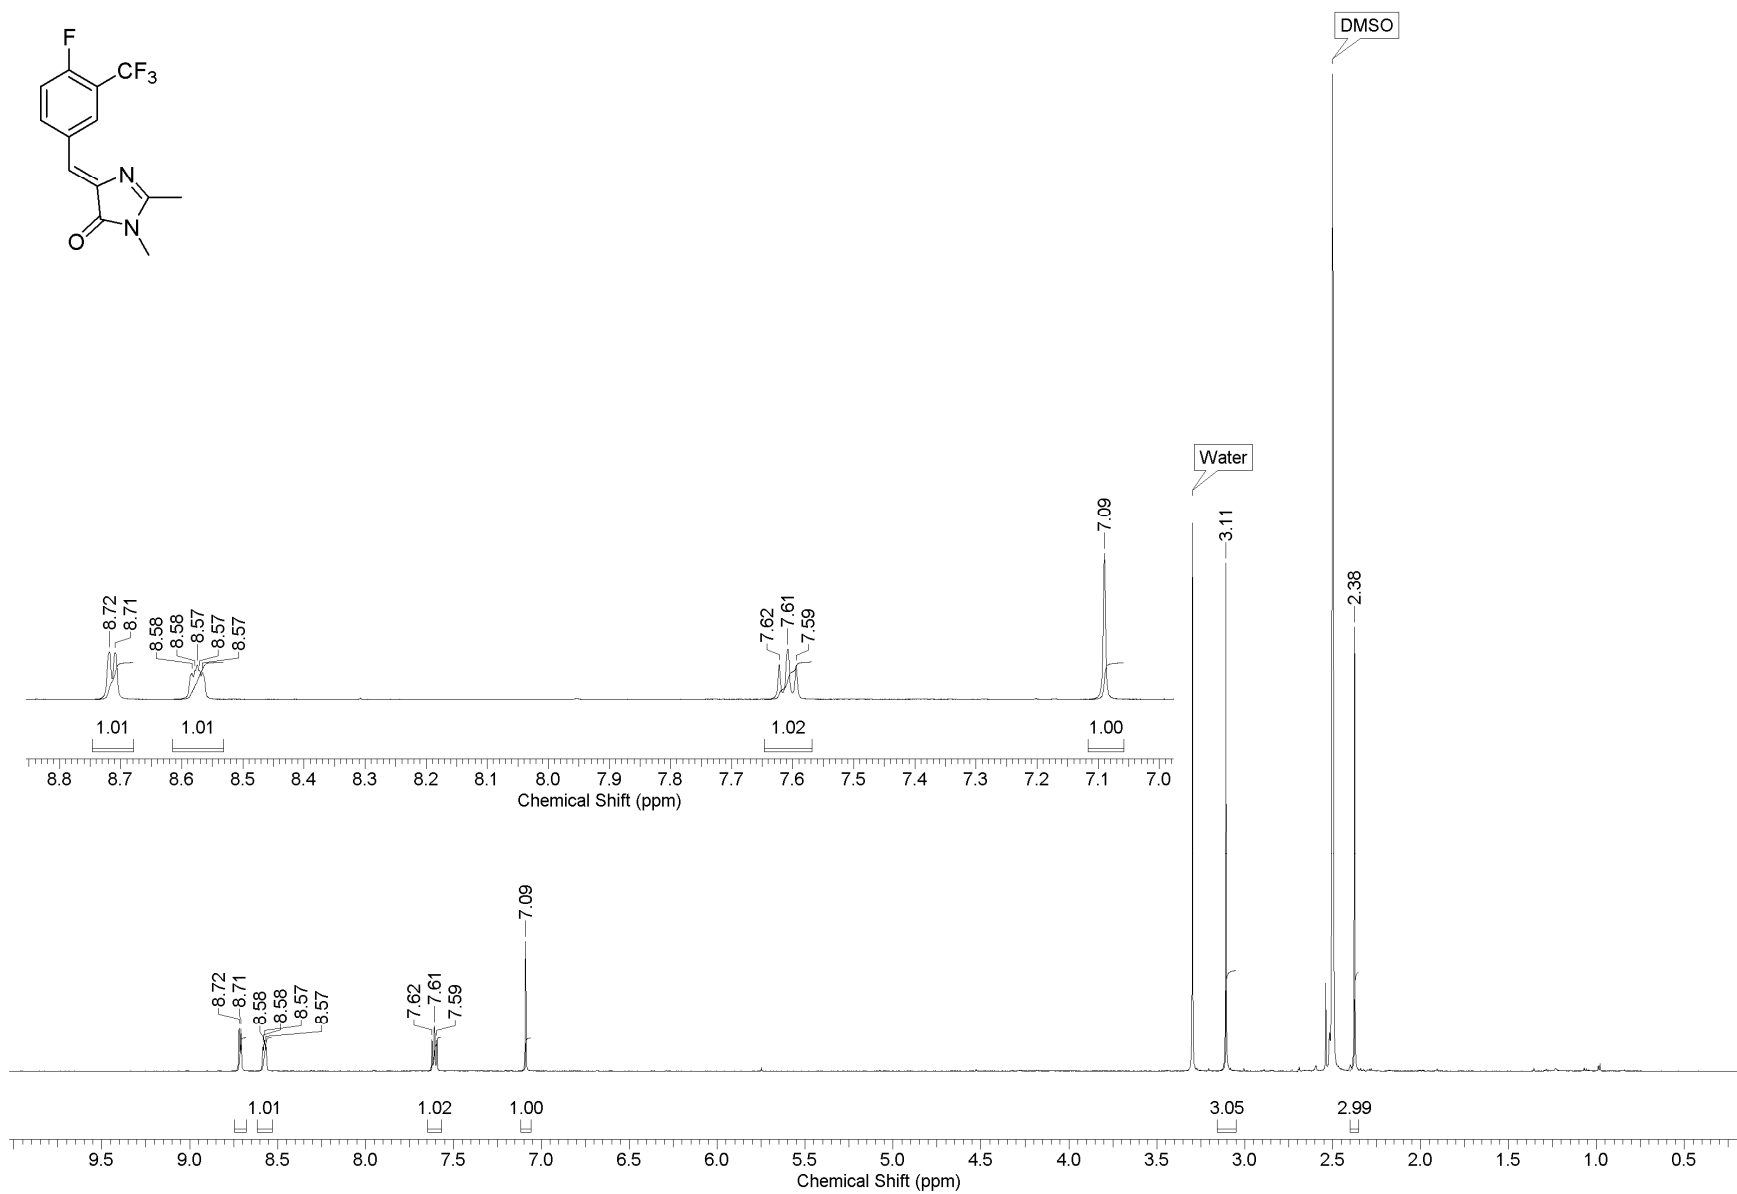

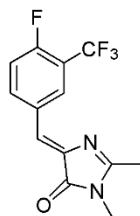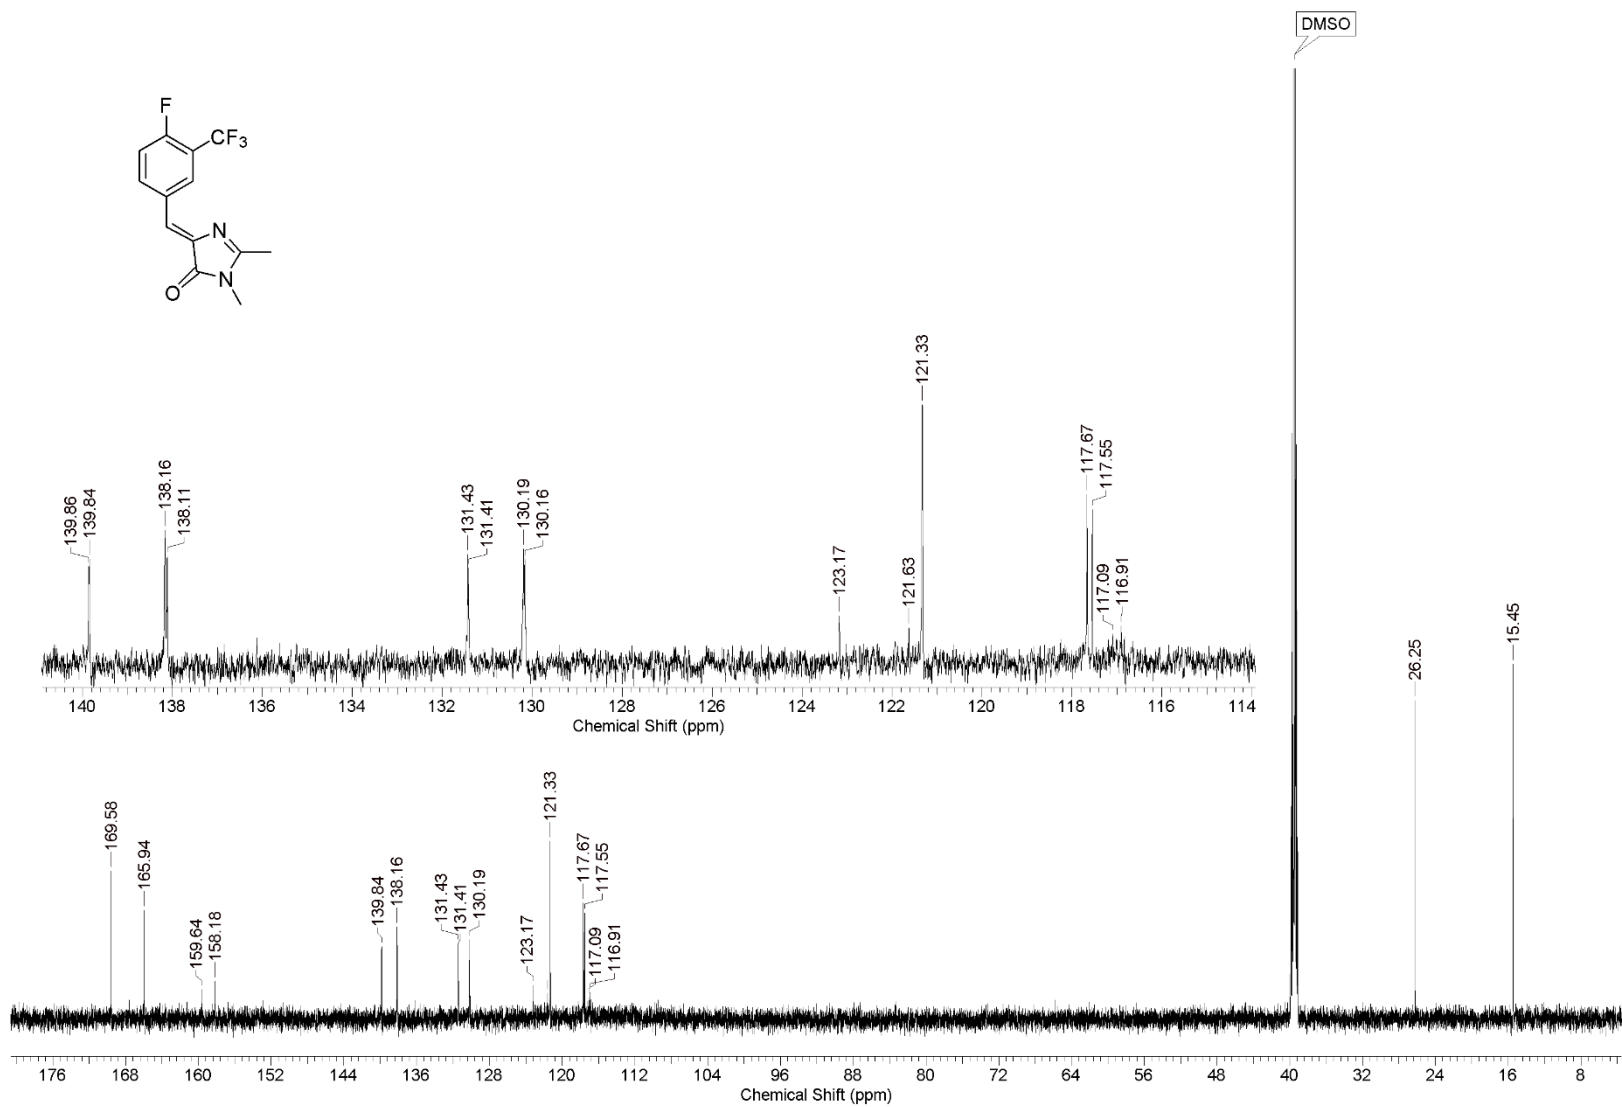

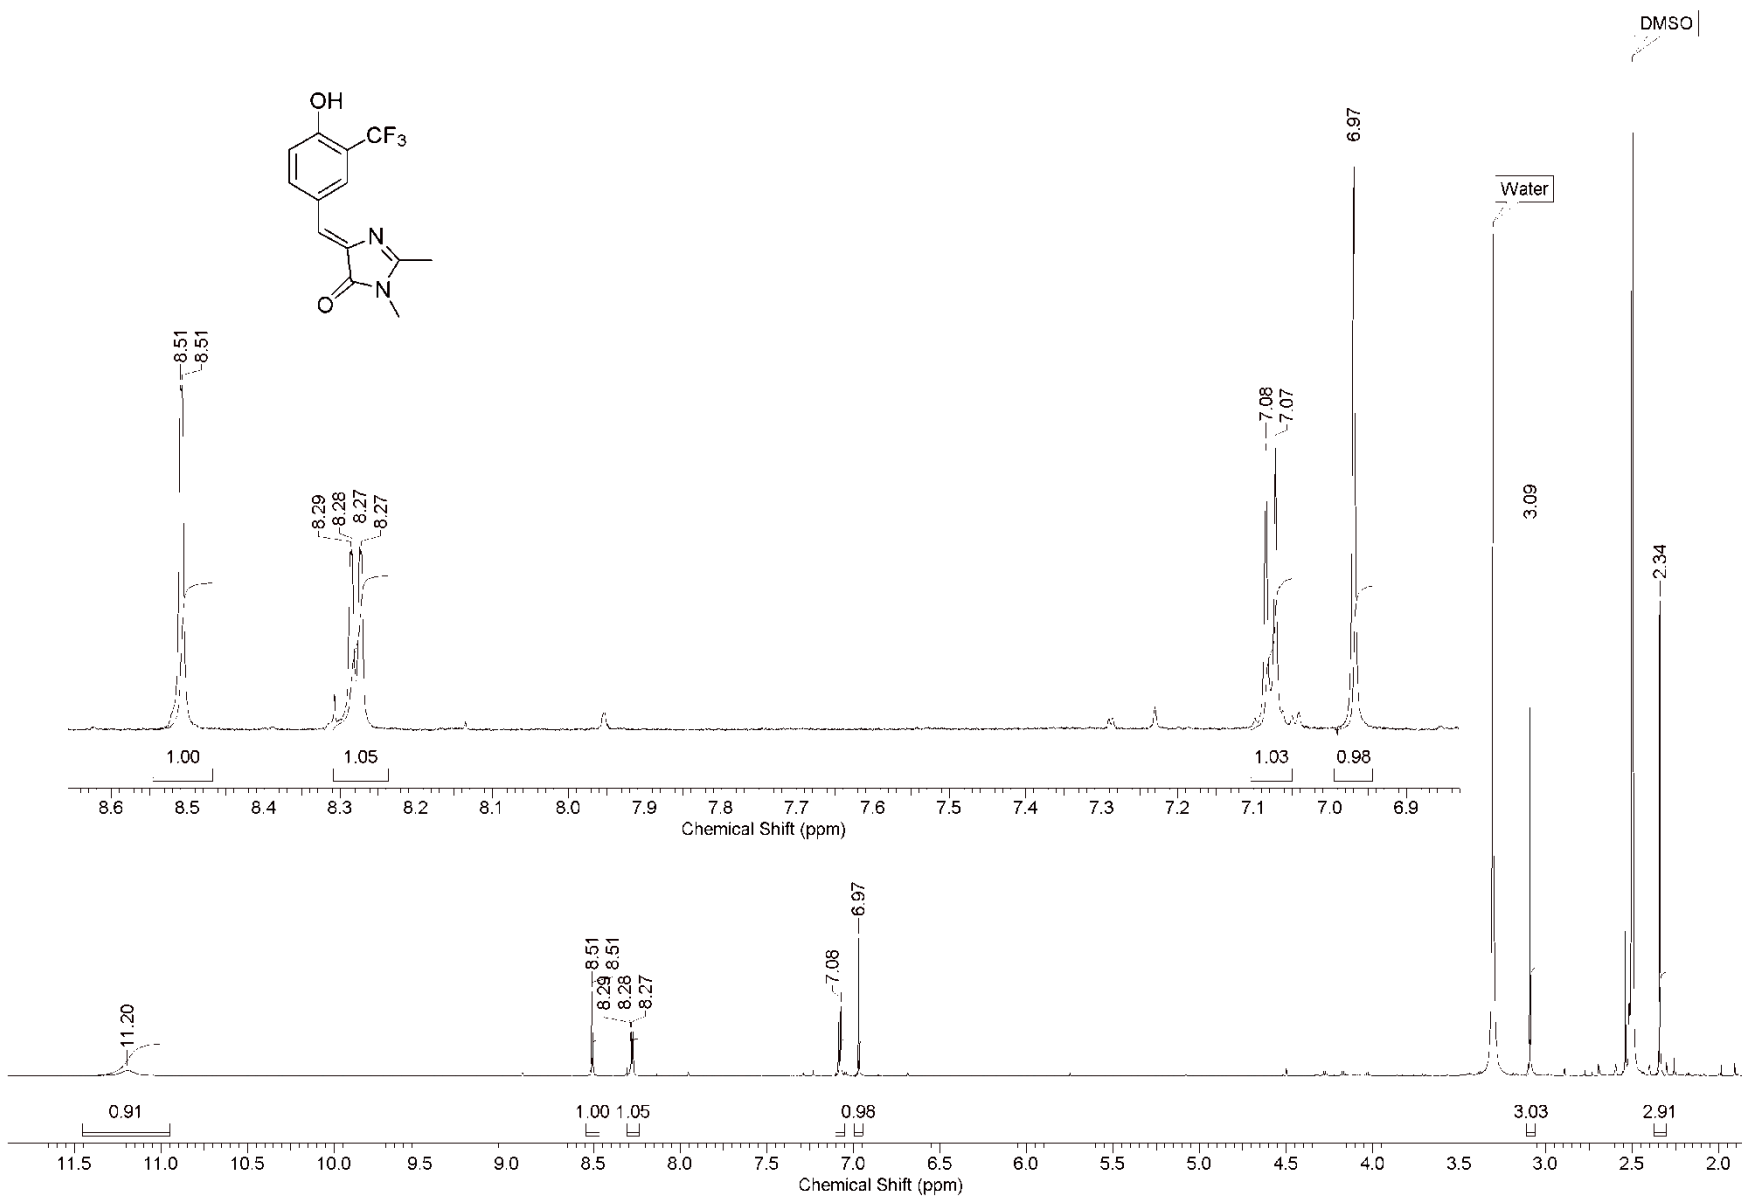

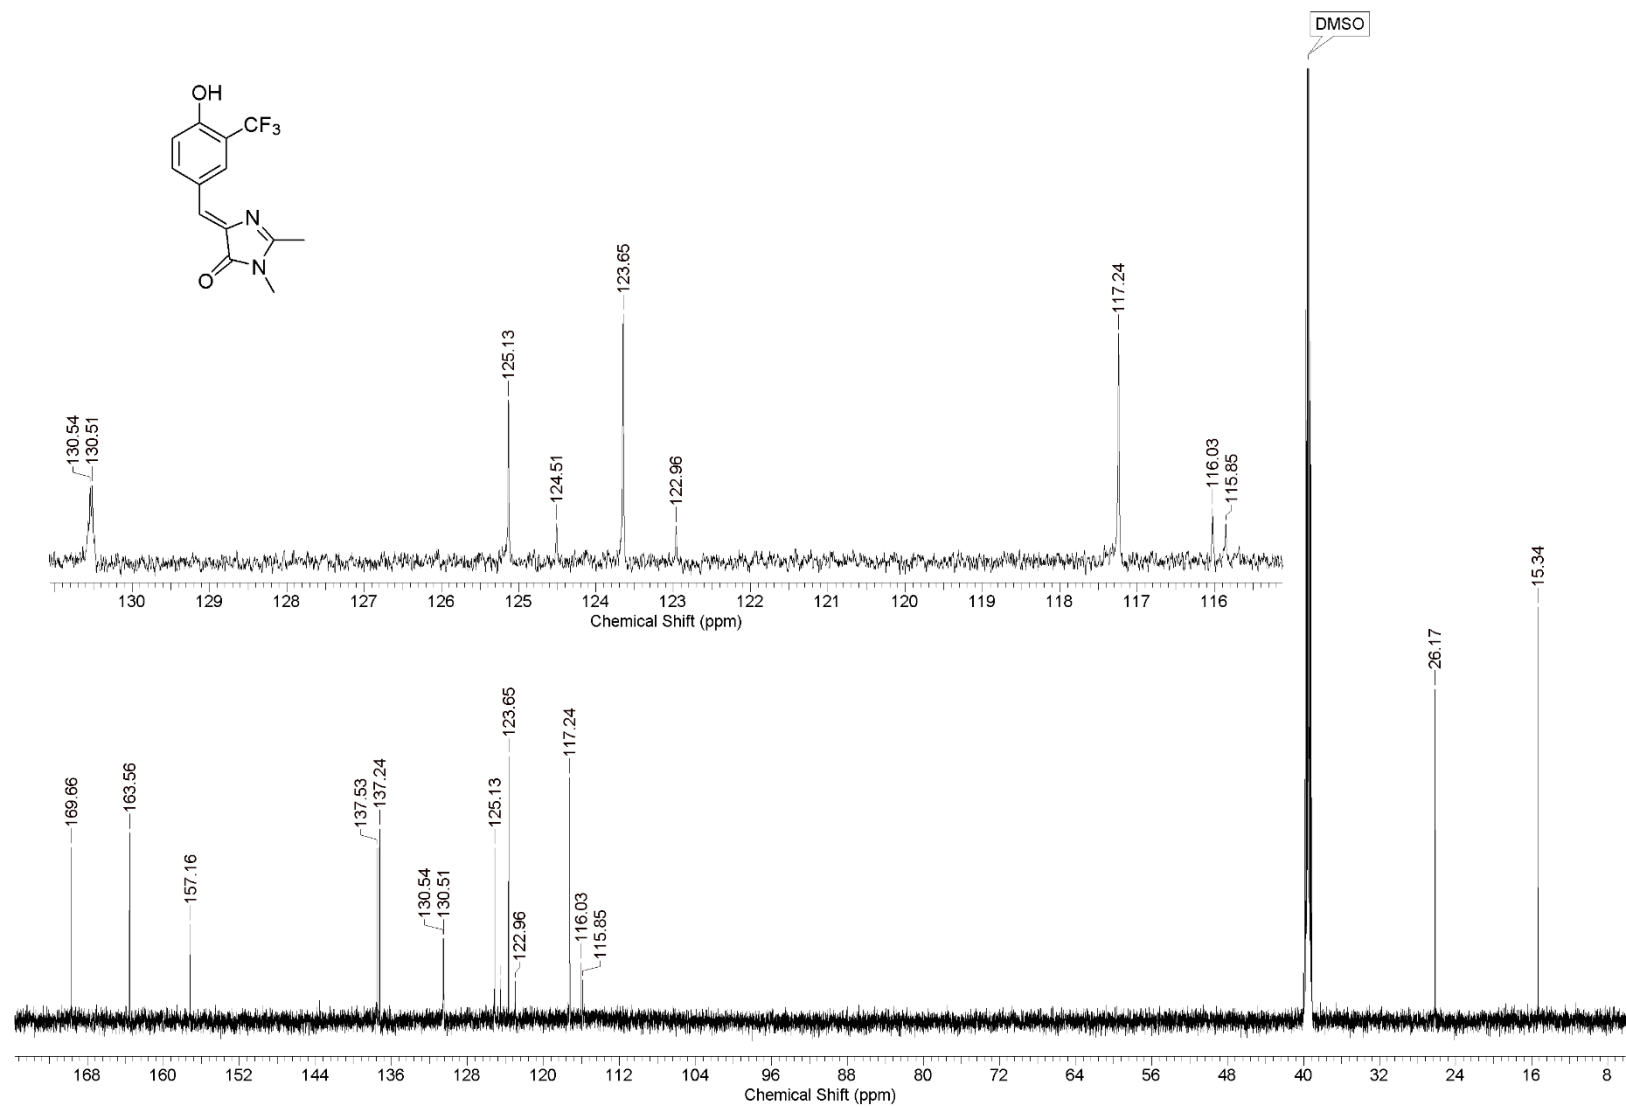

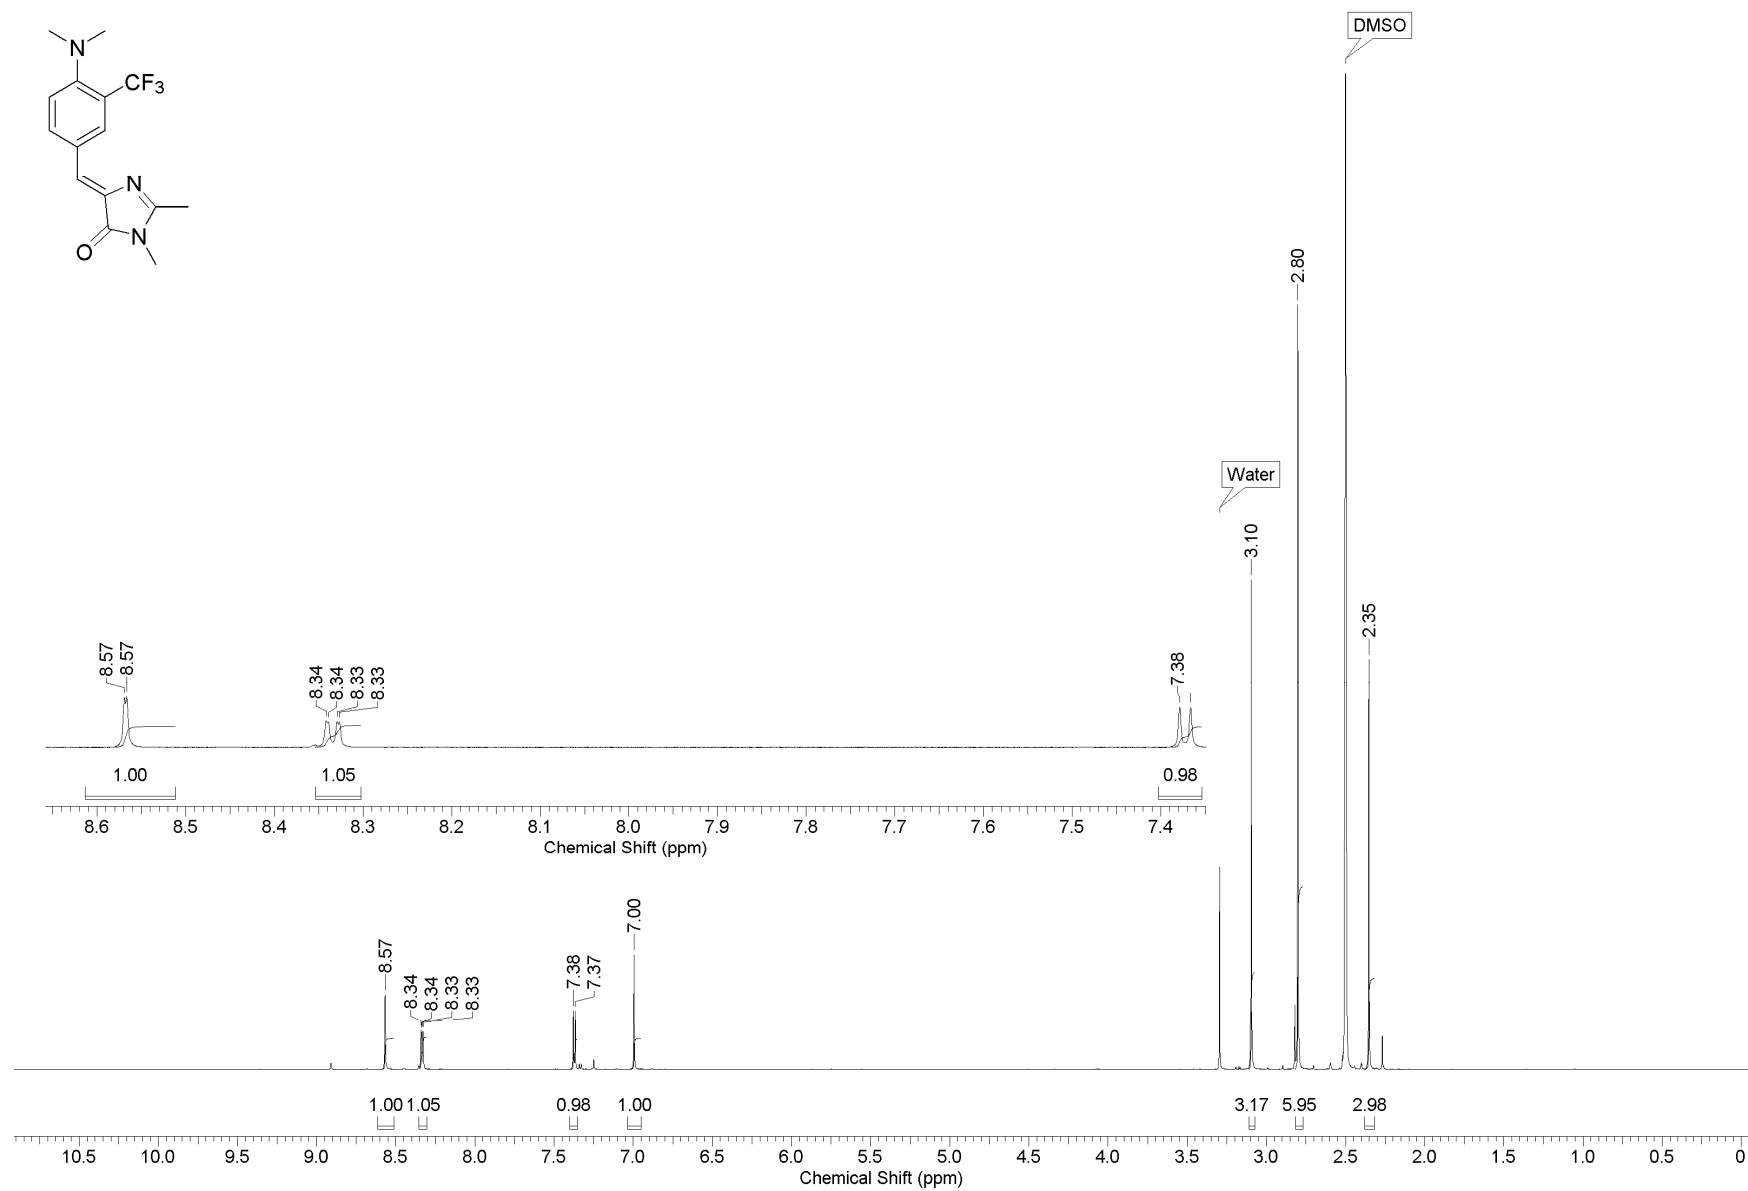

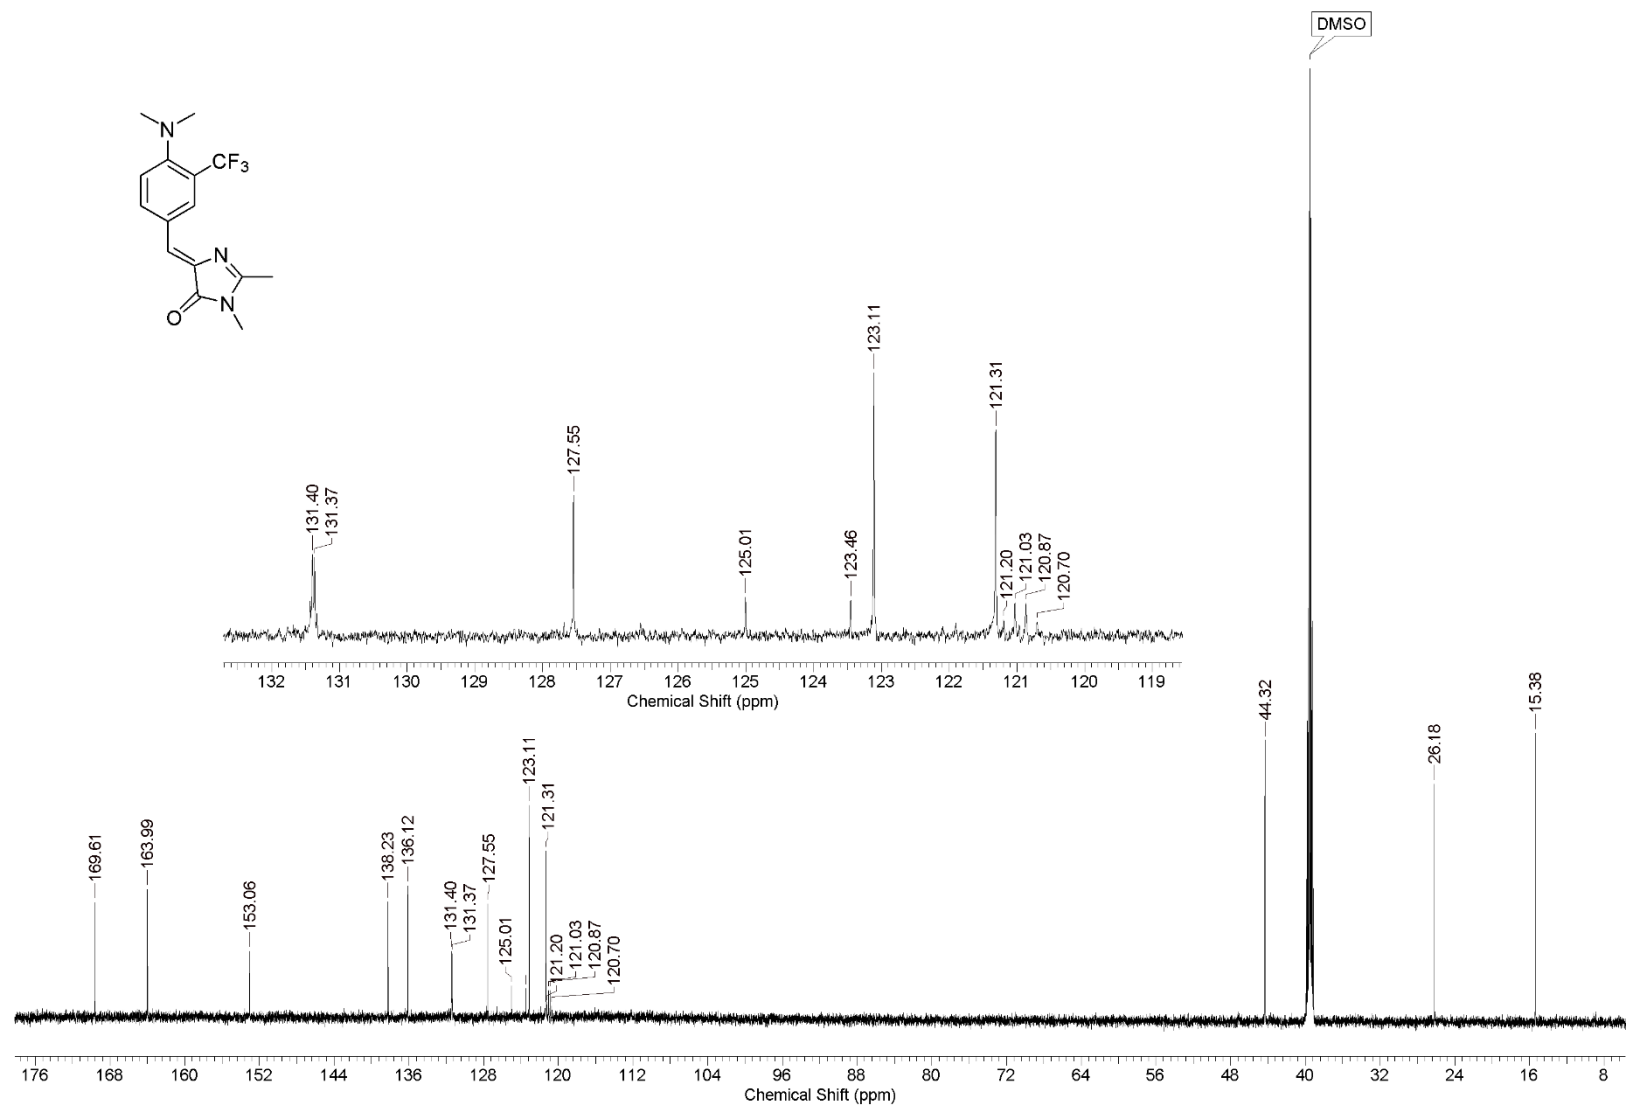

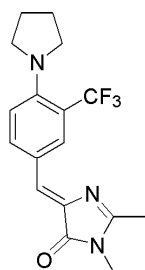

\* = E-isomer (at the benzylidene moiety)

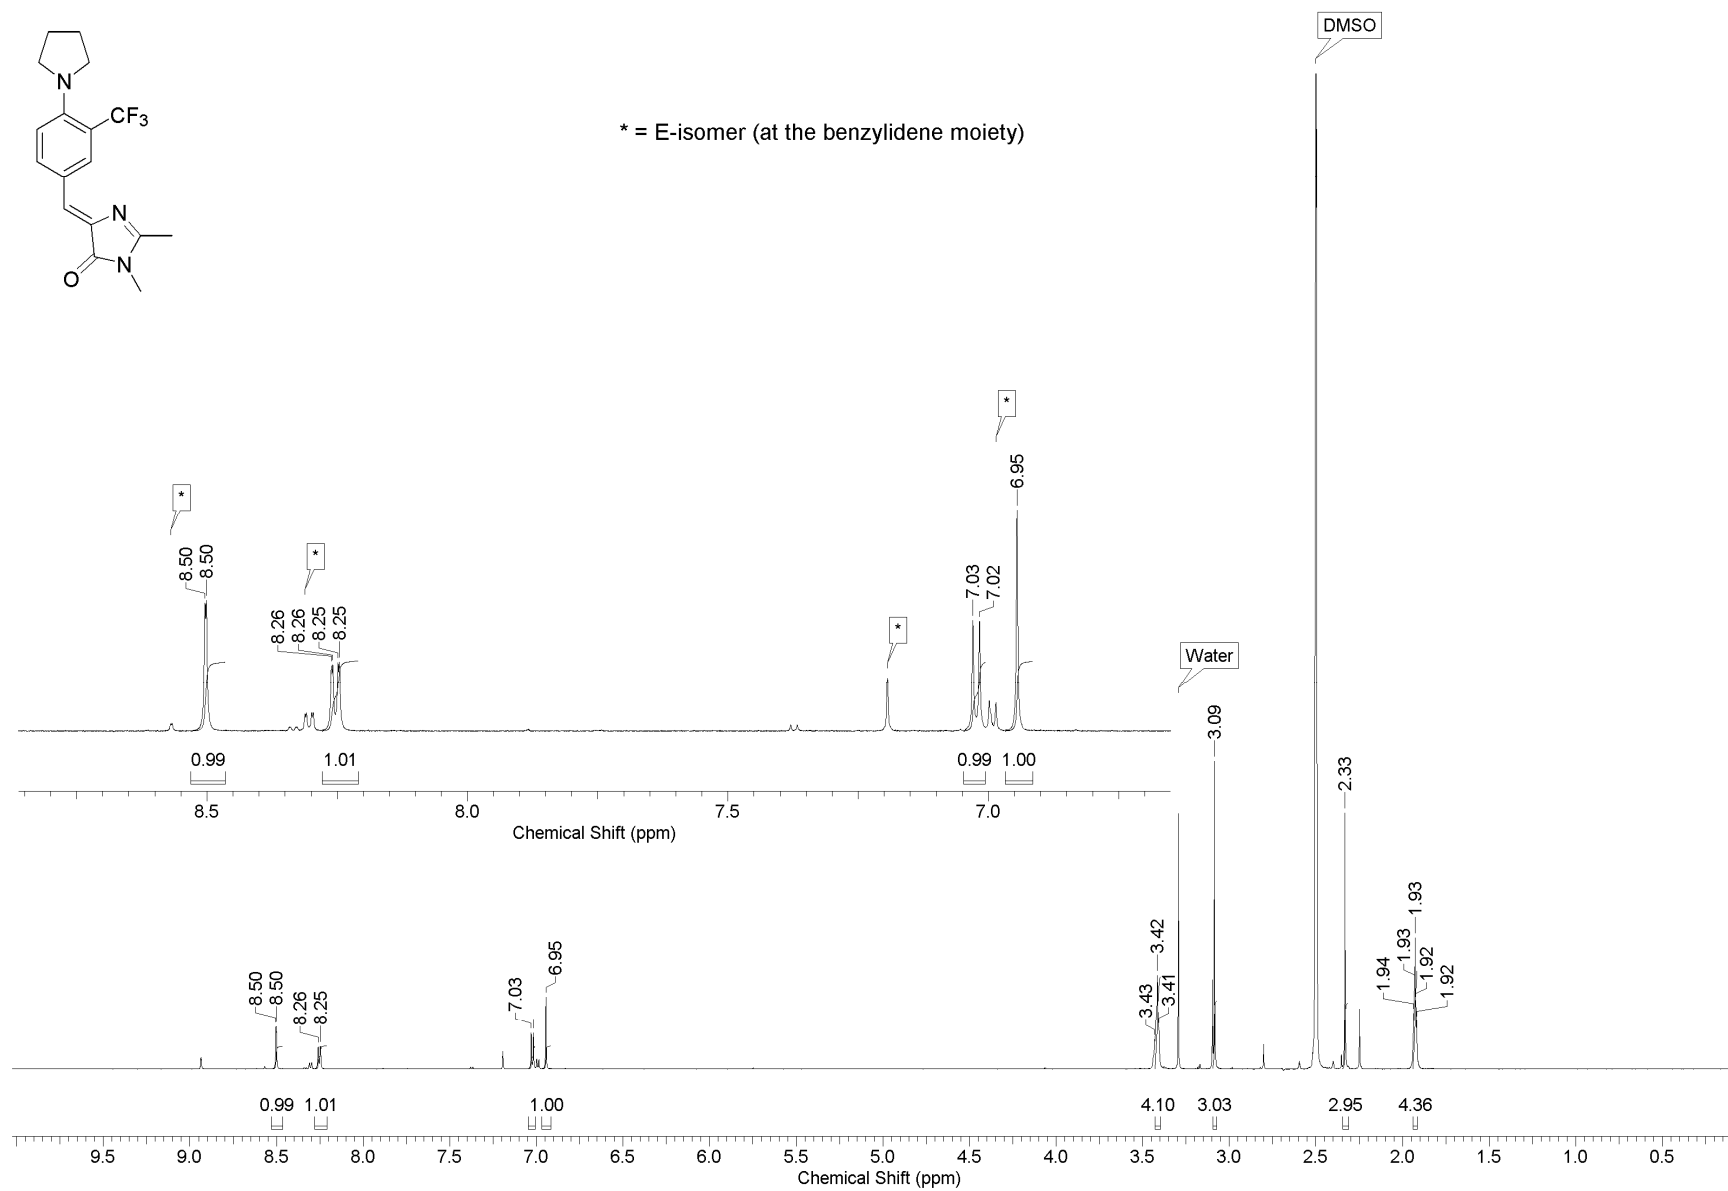

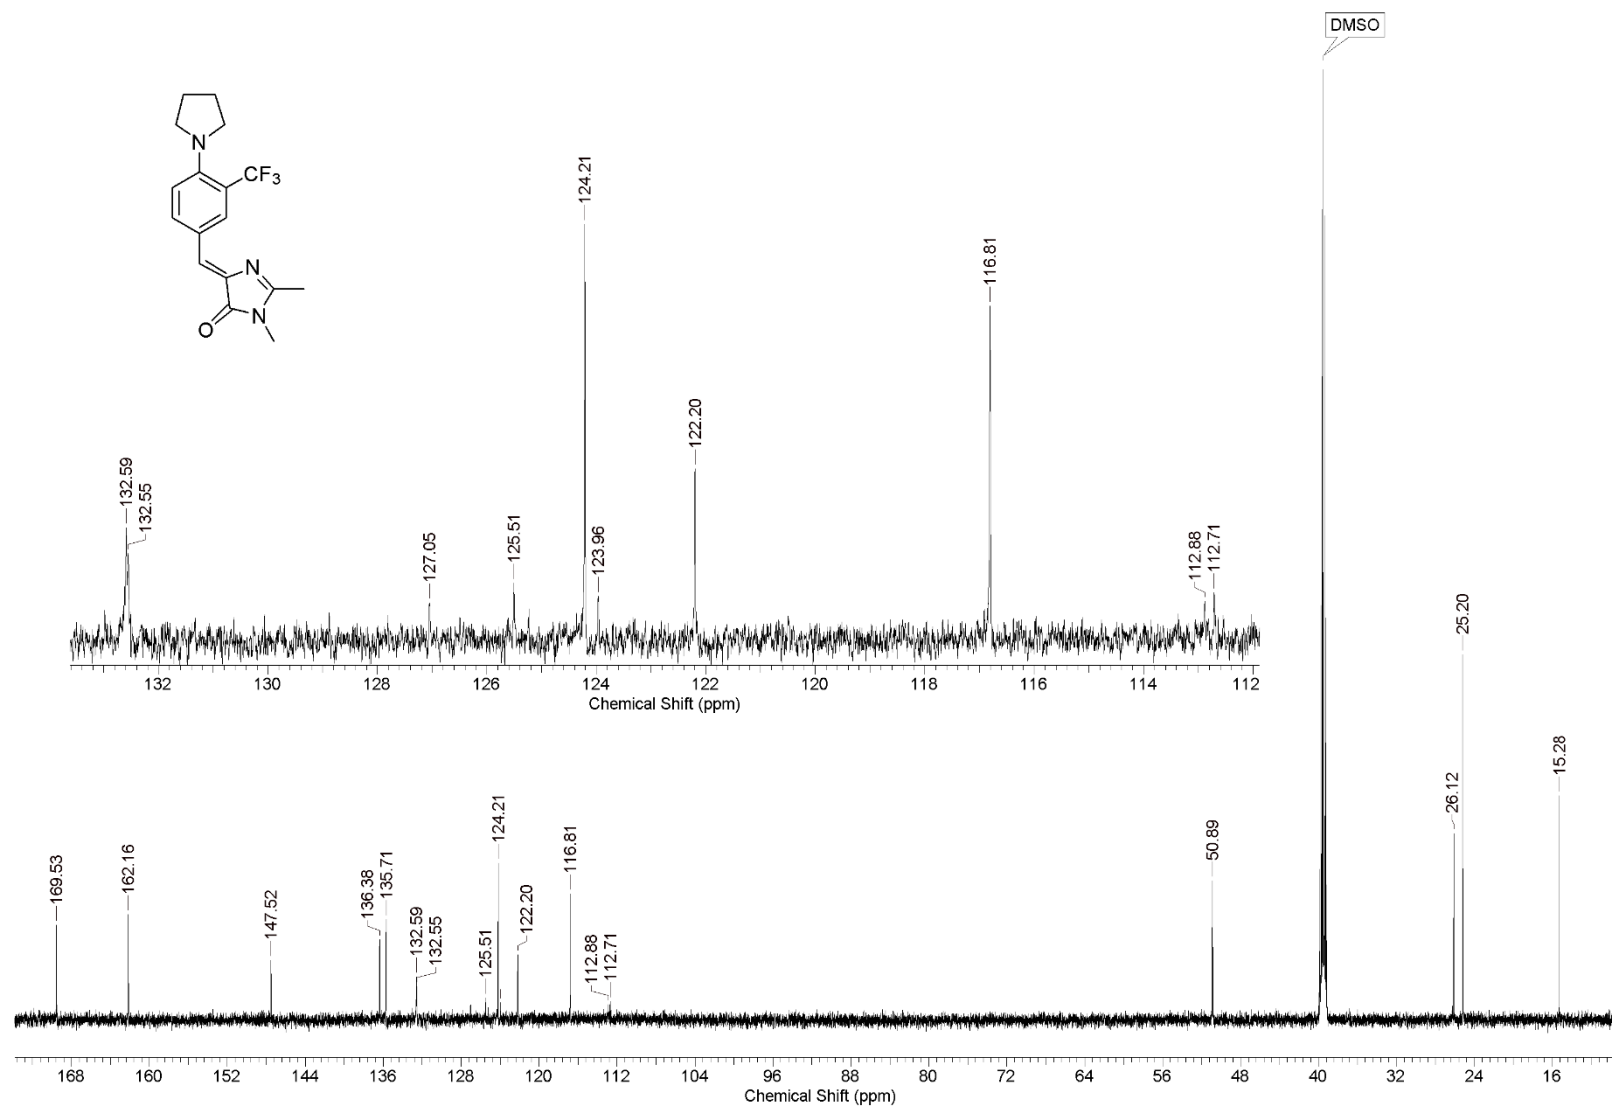

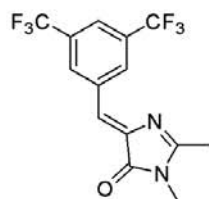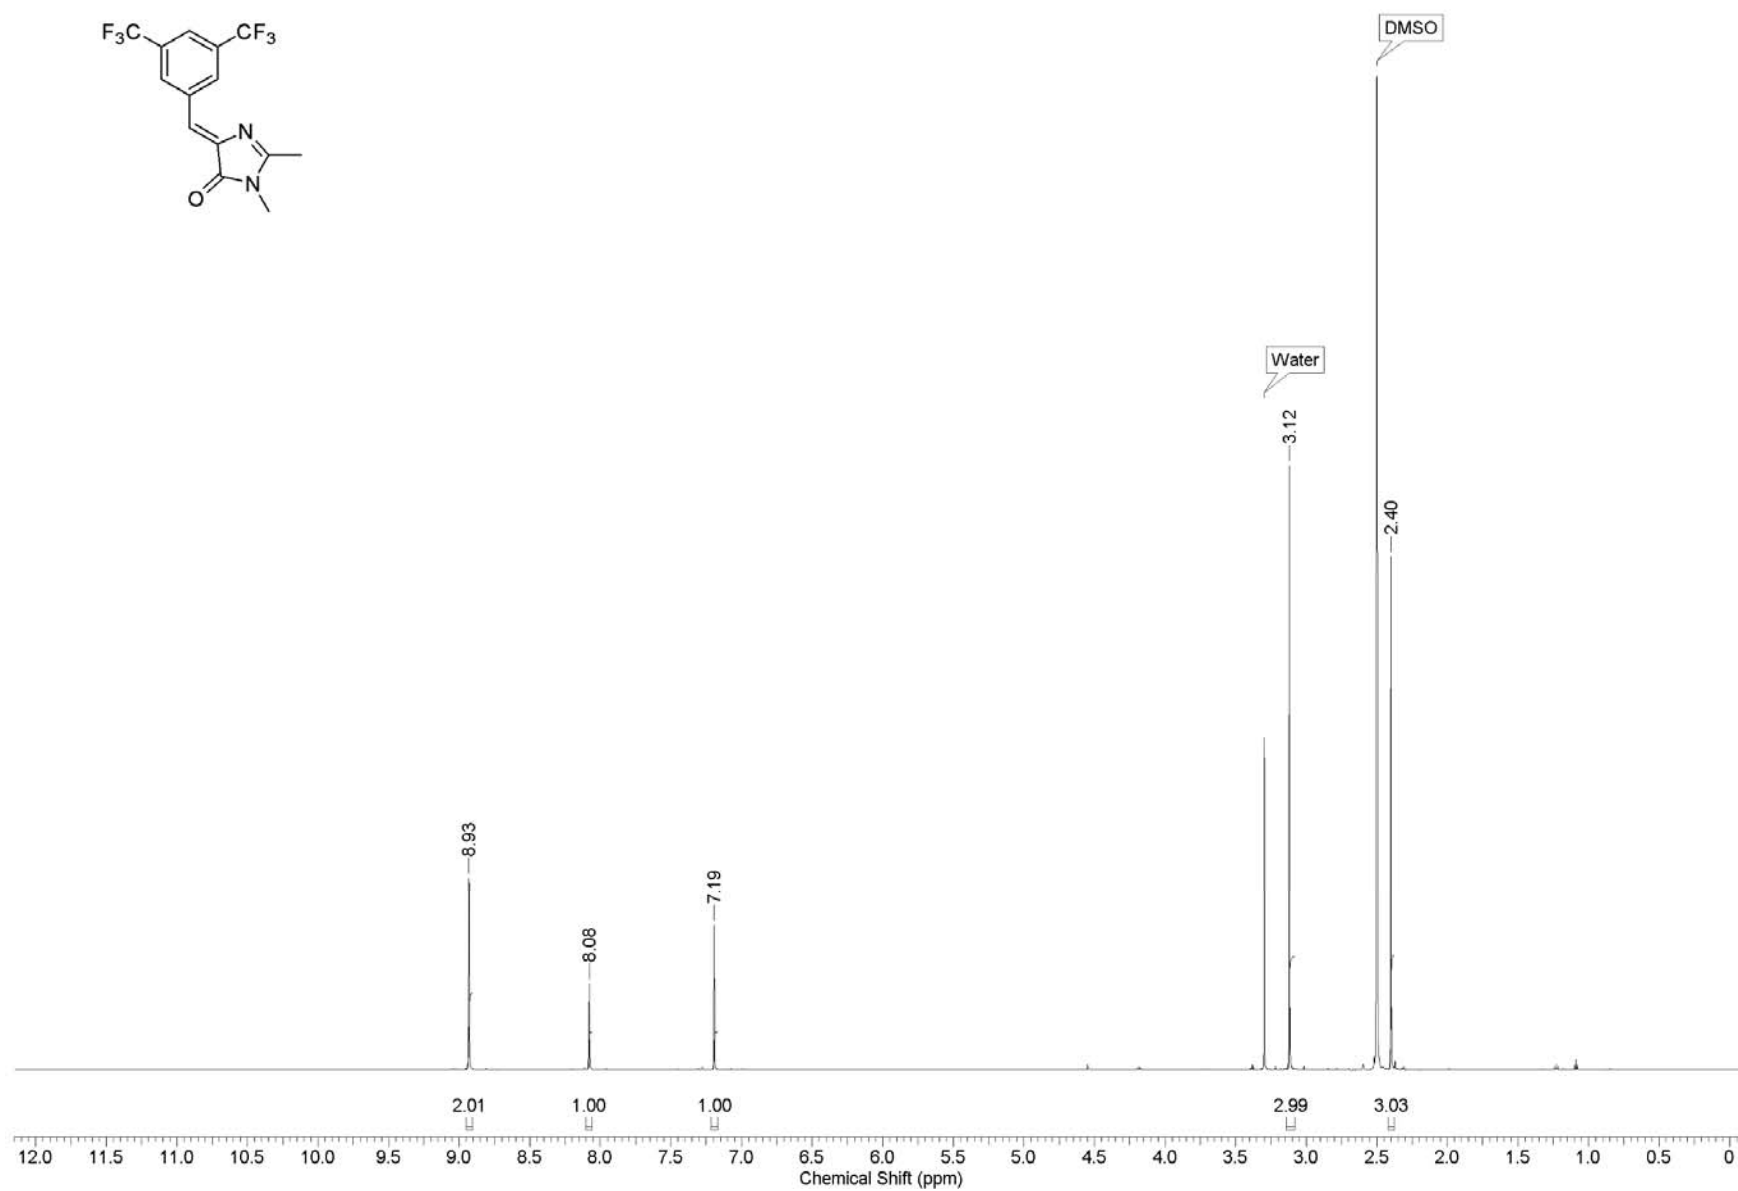

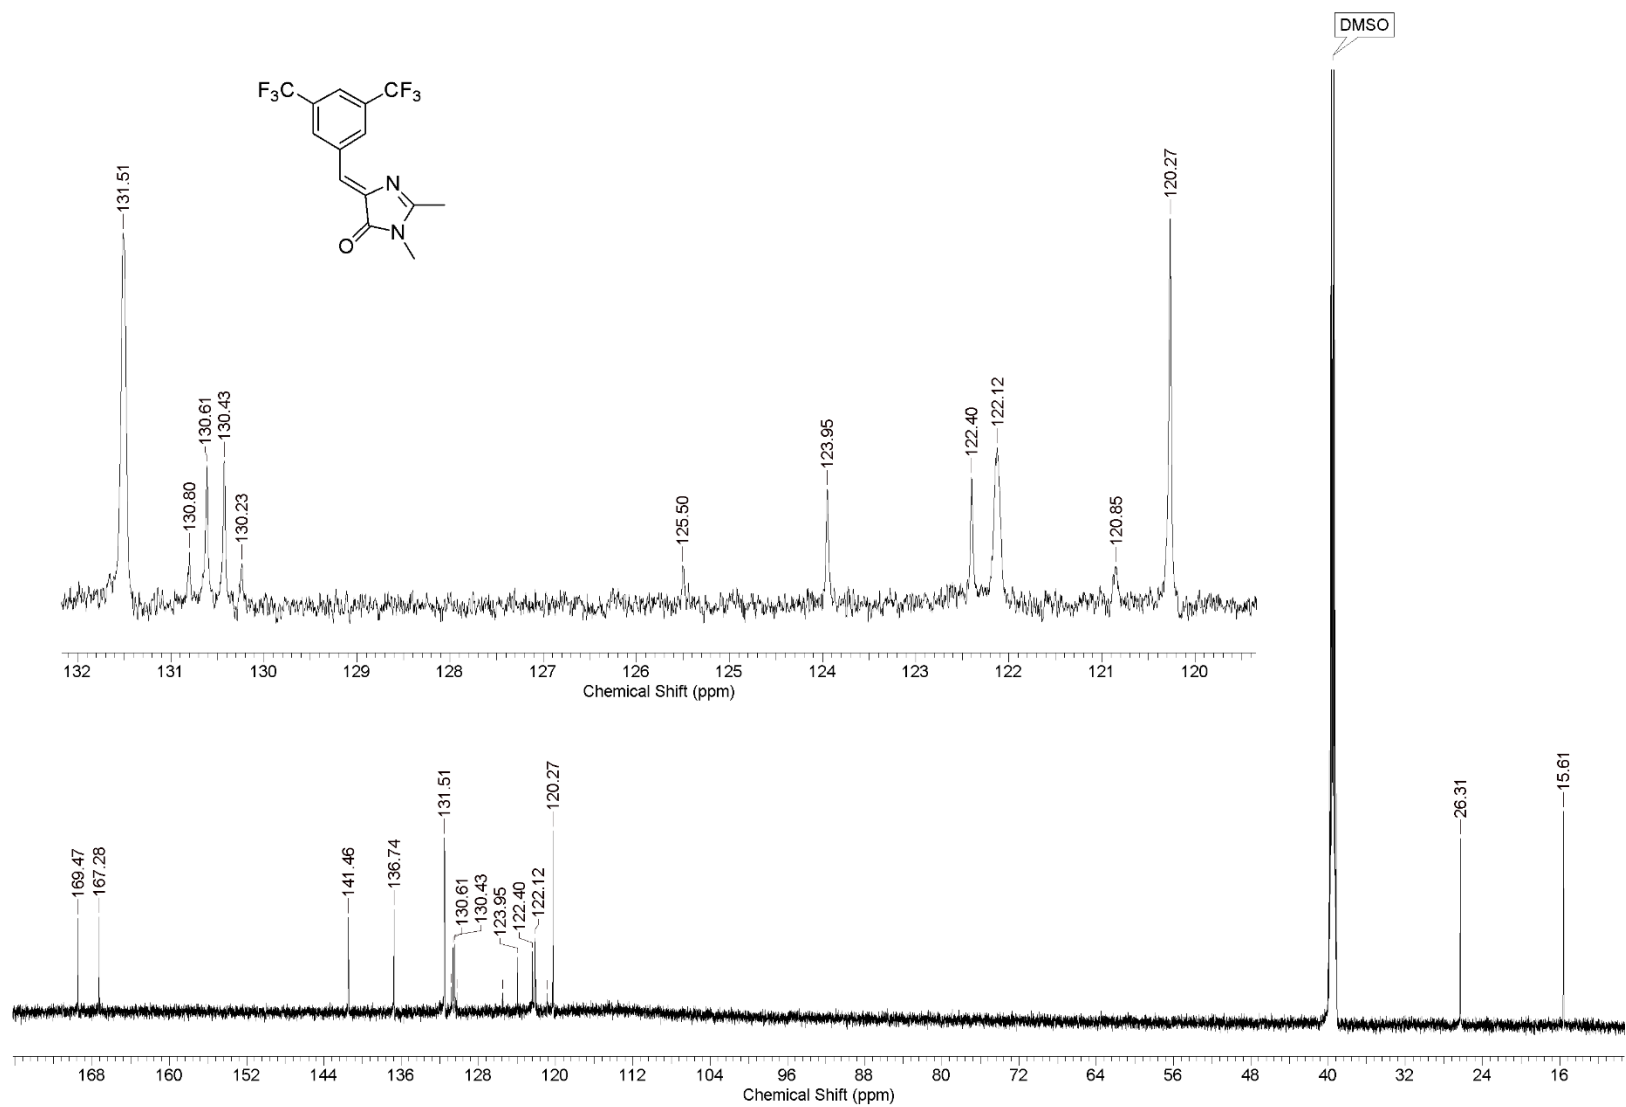

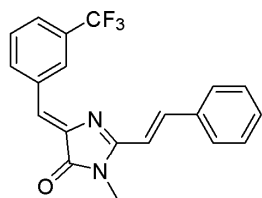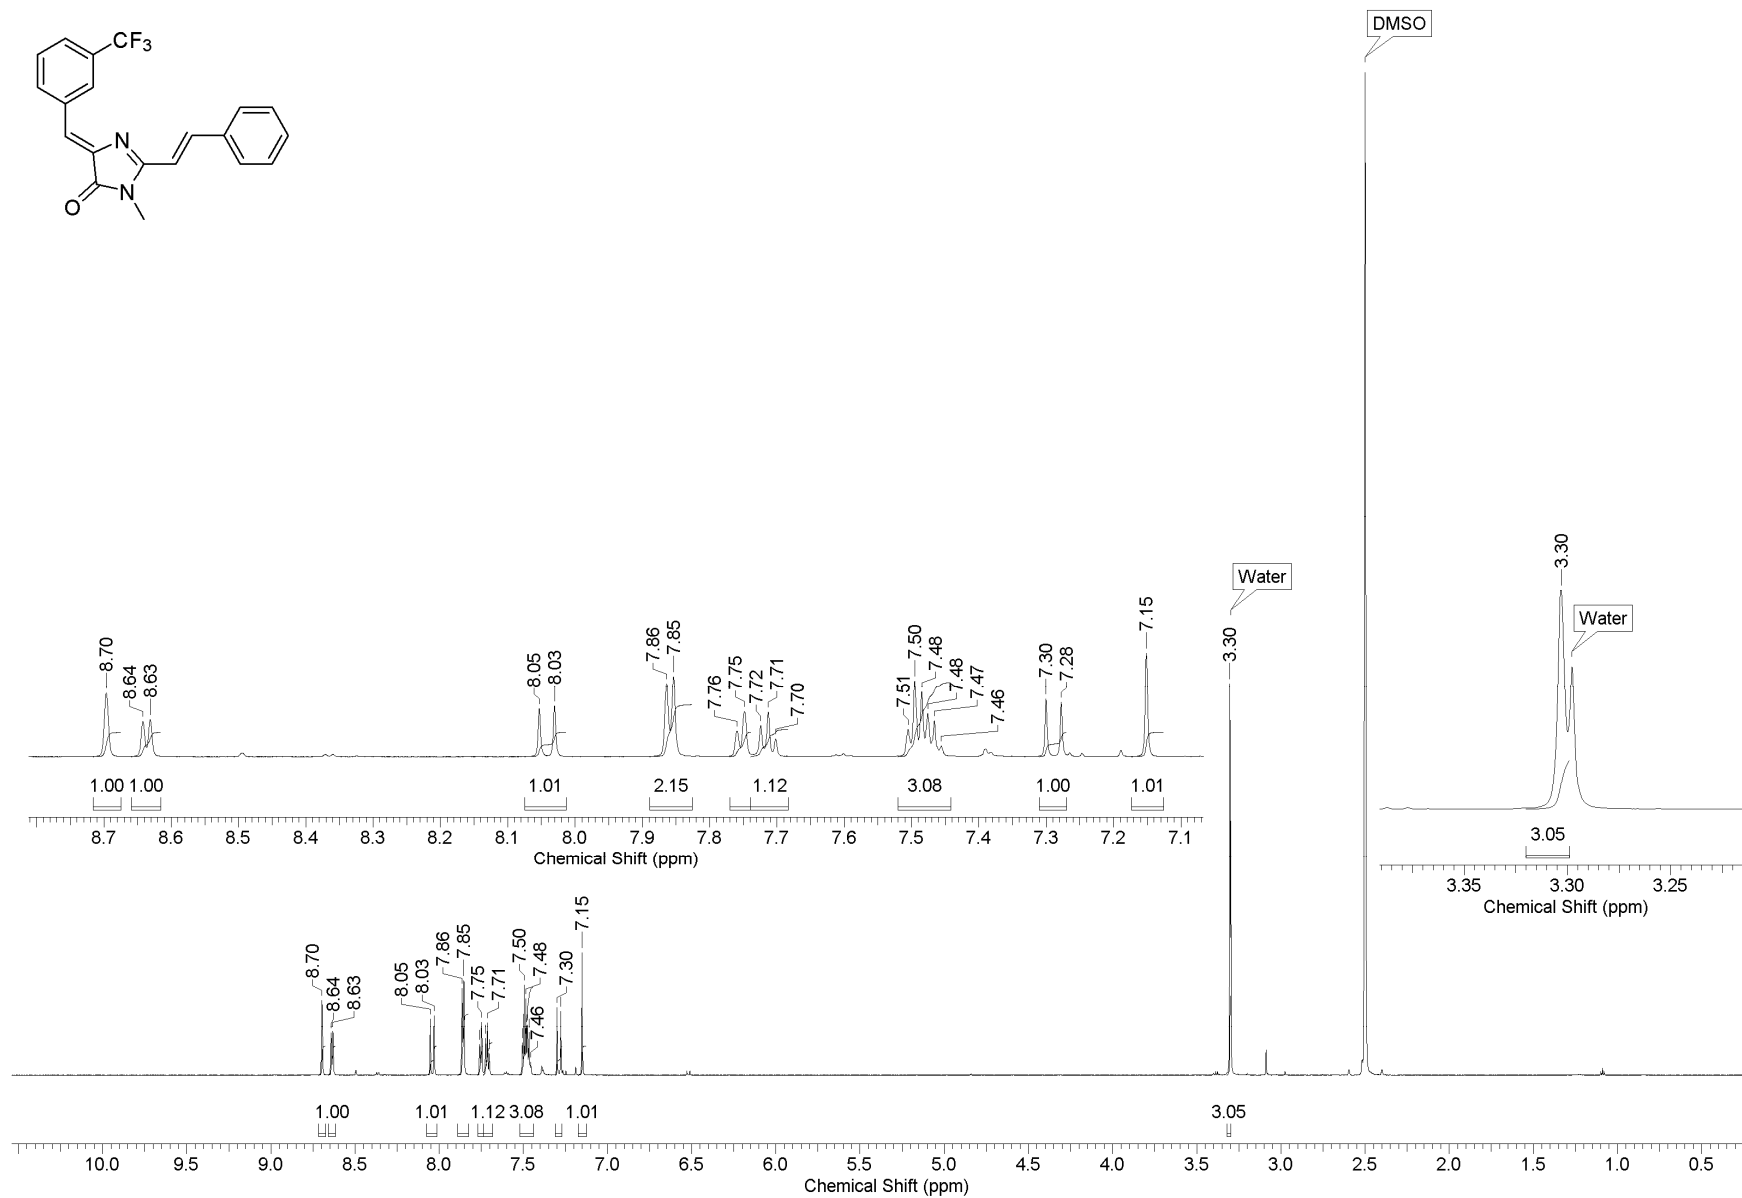

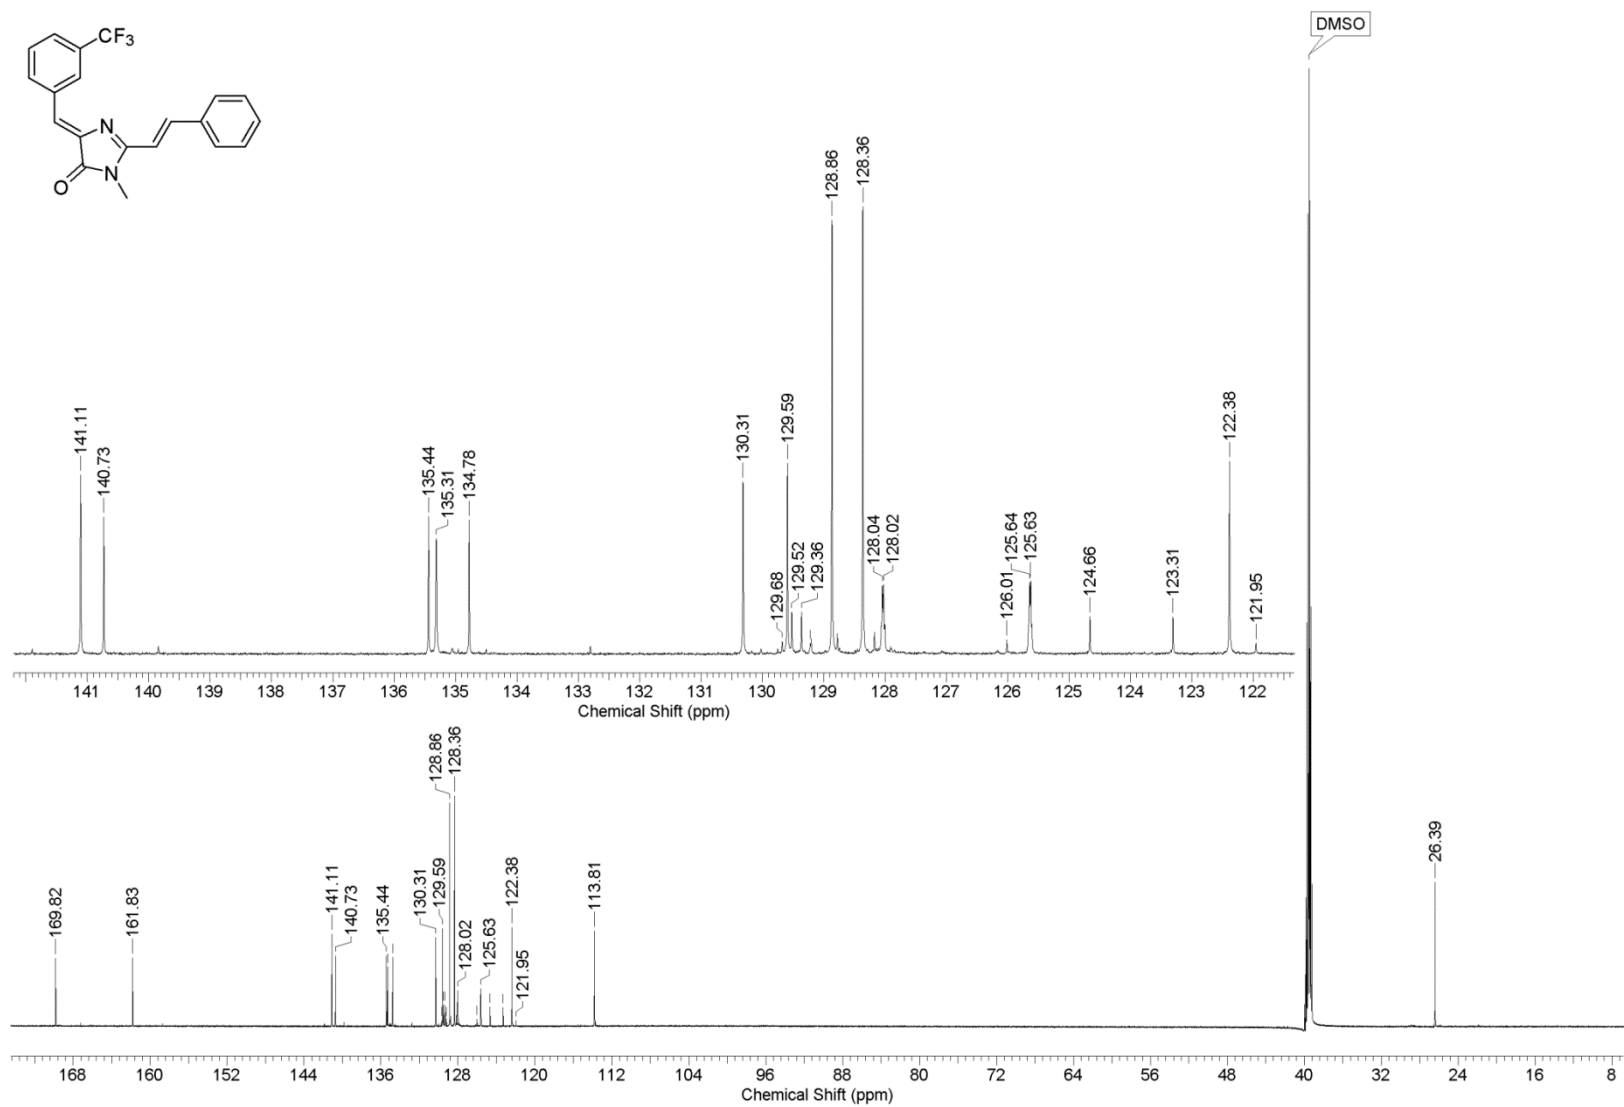

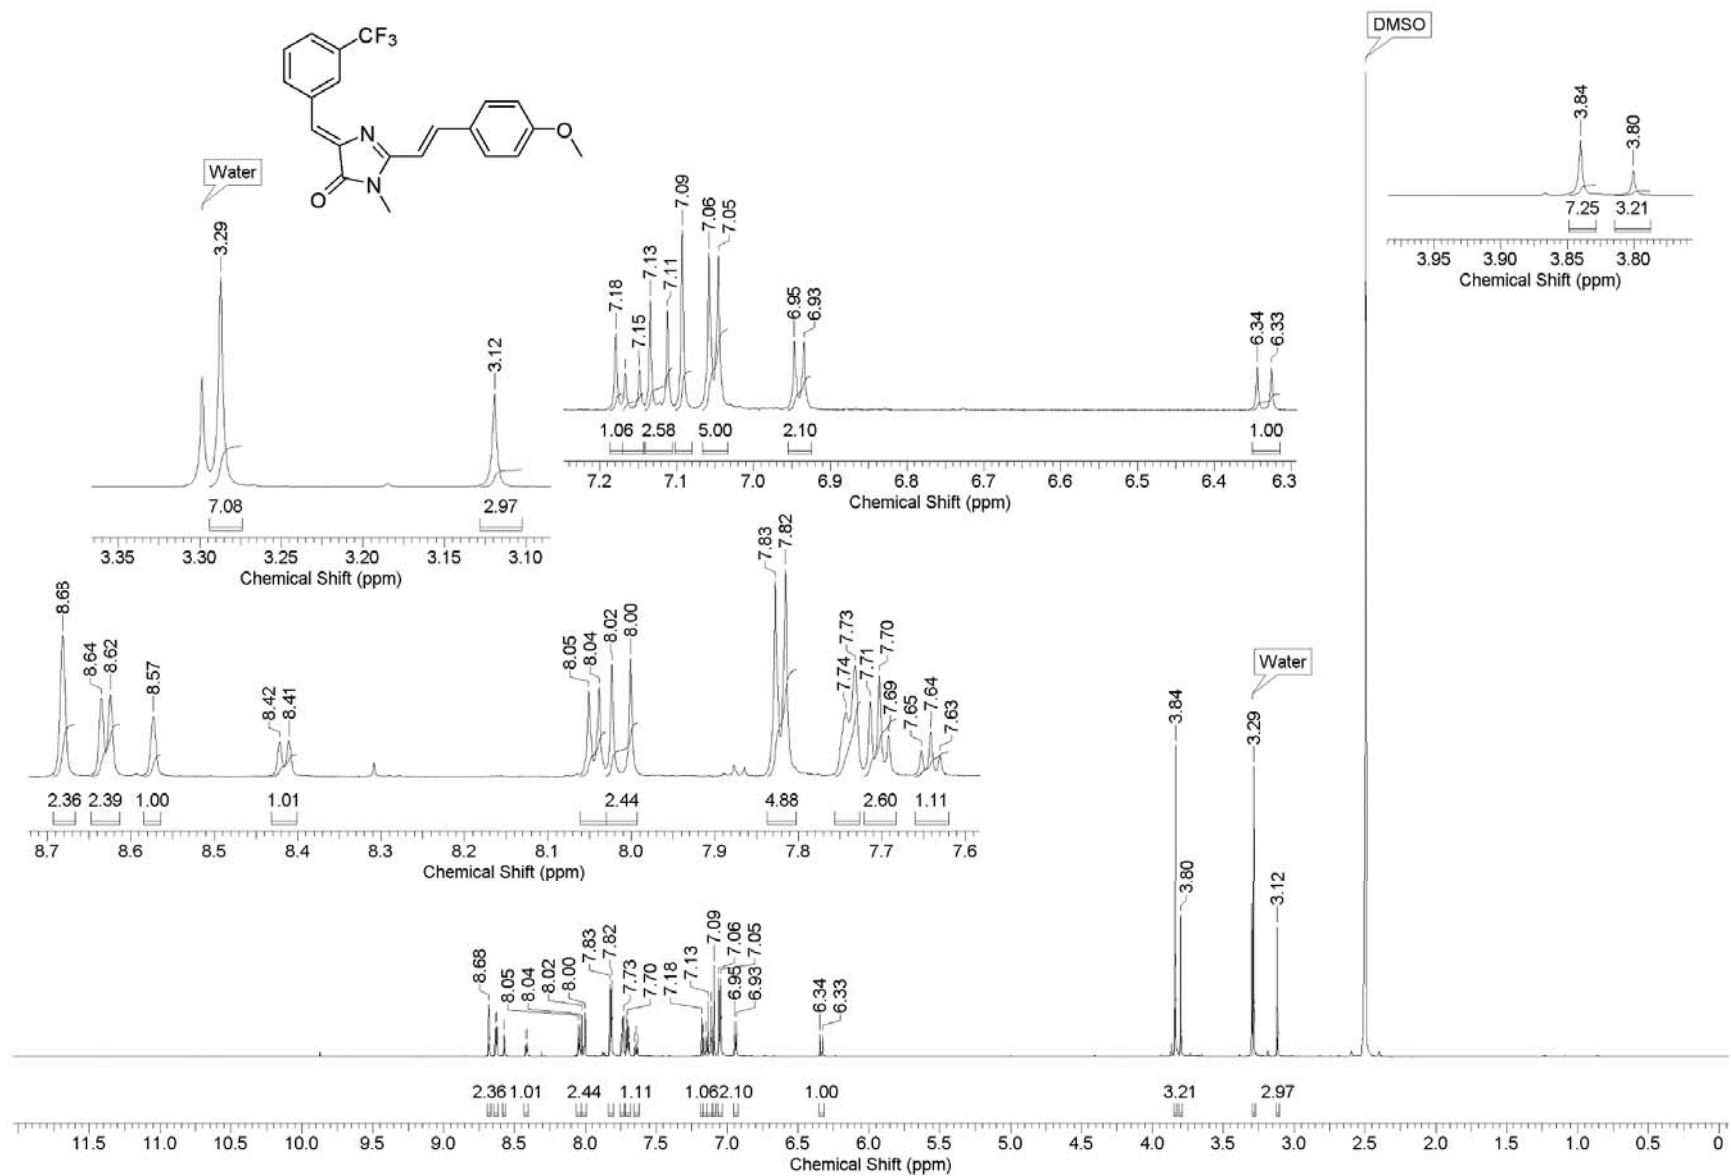

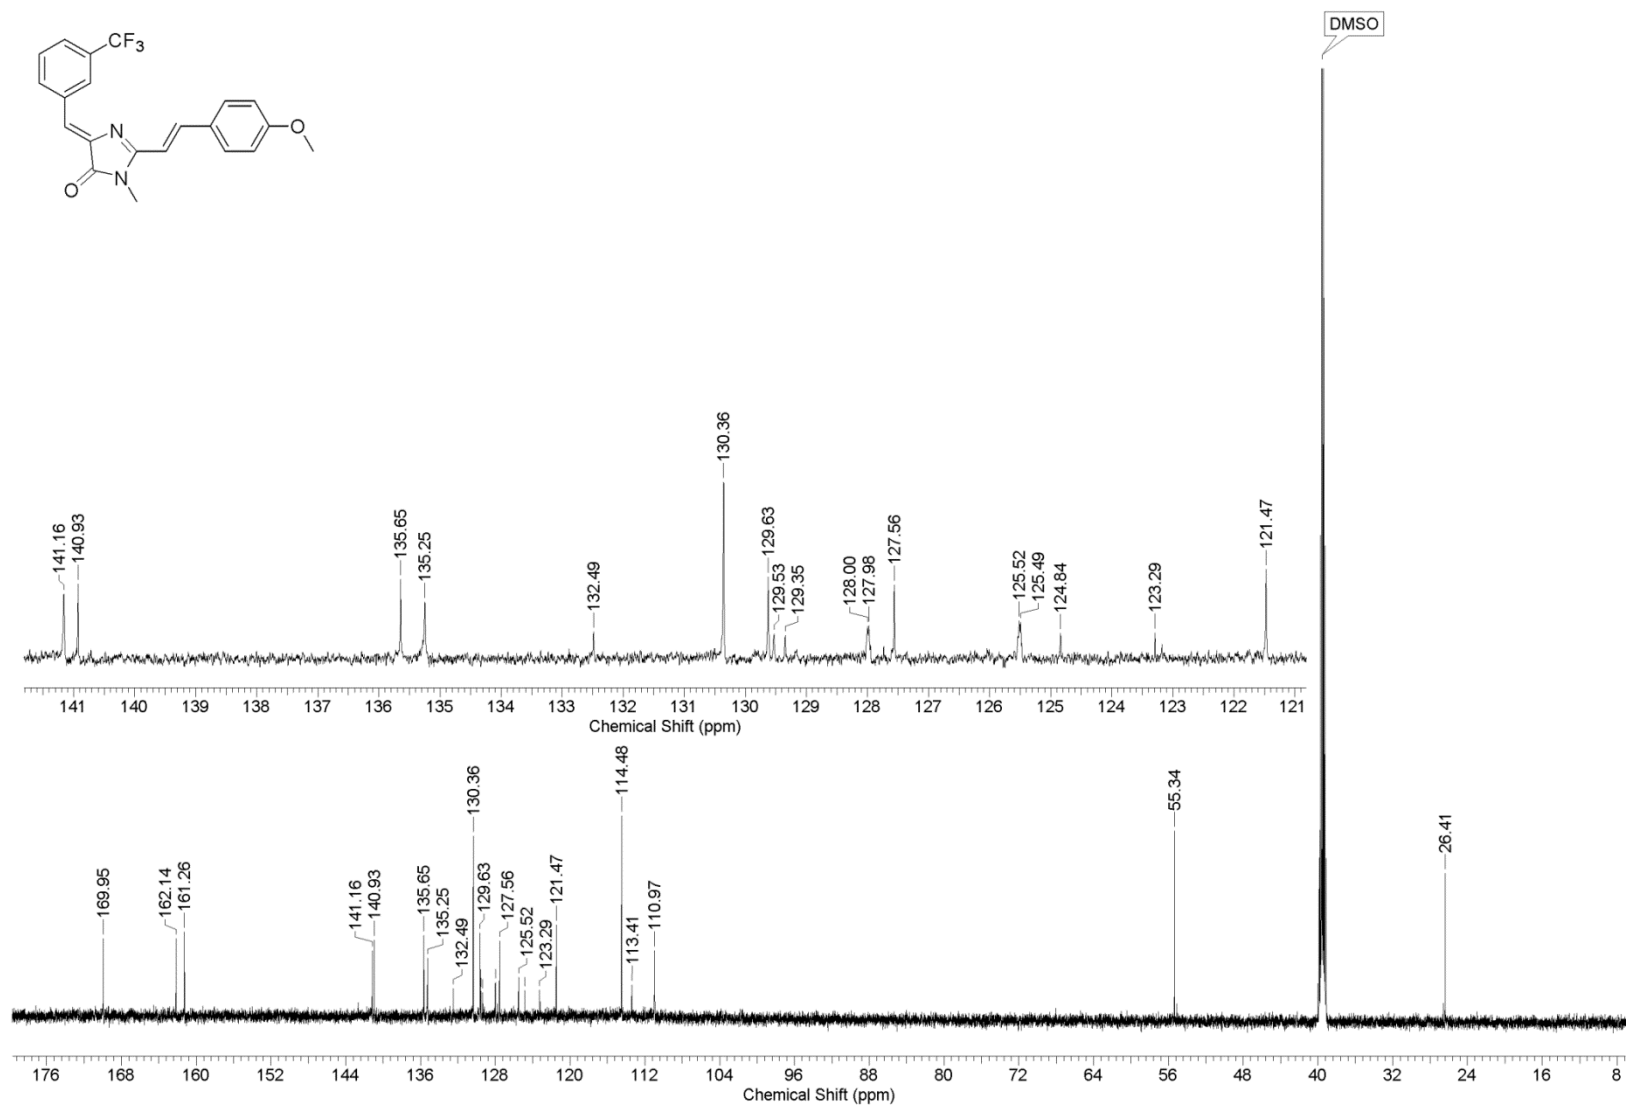

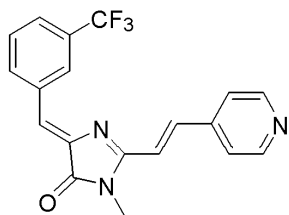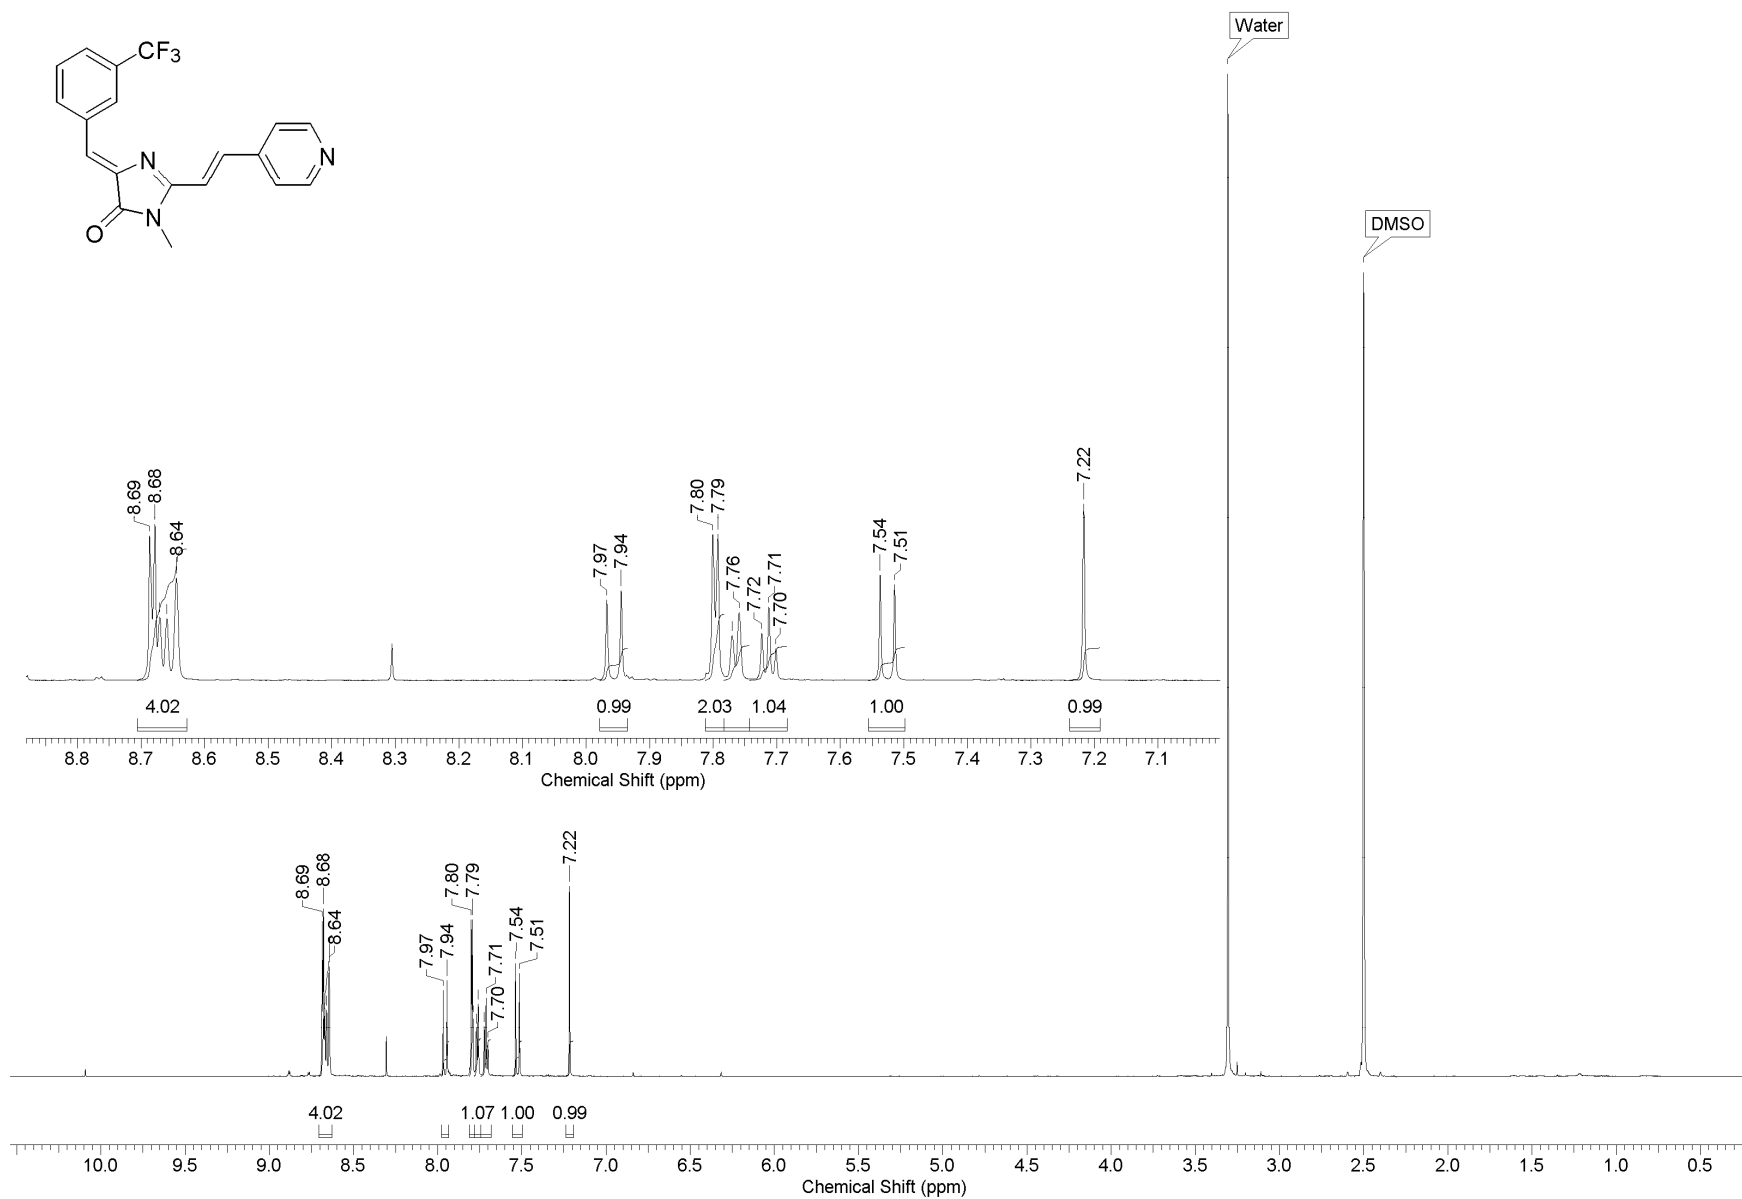

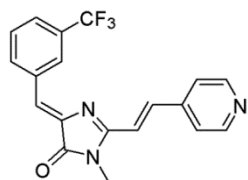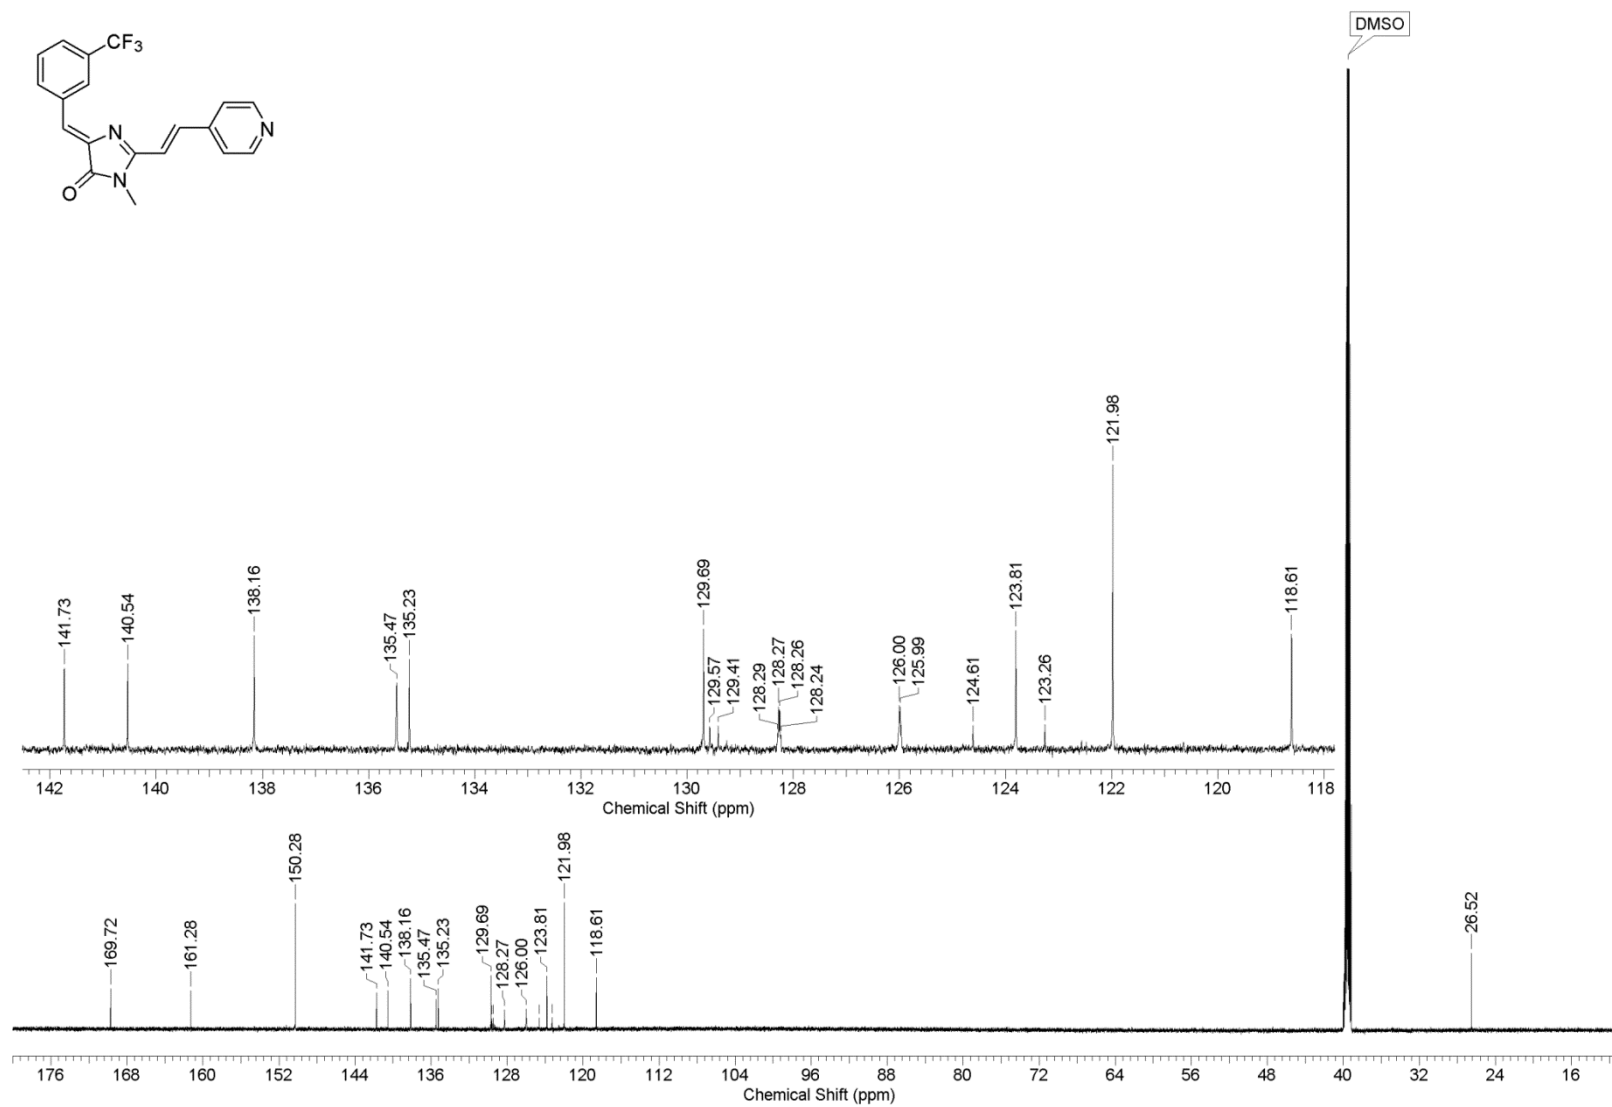

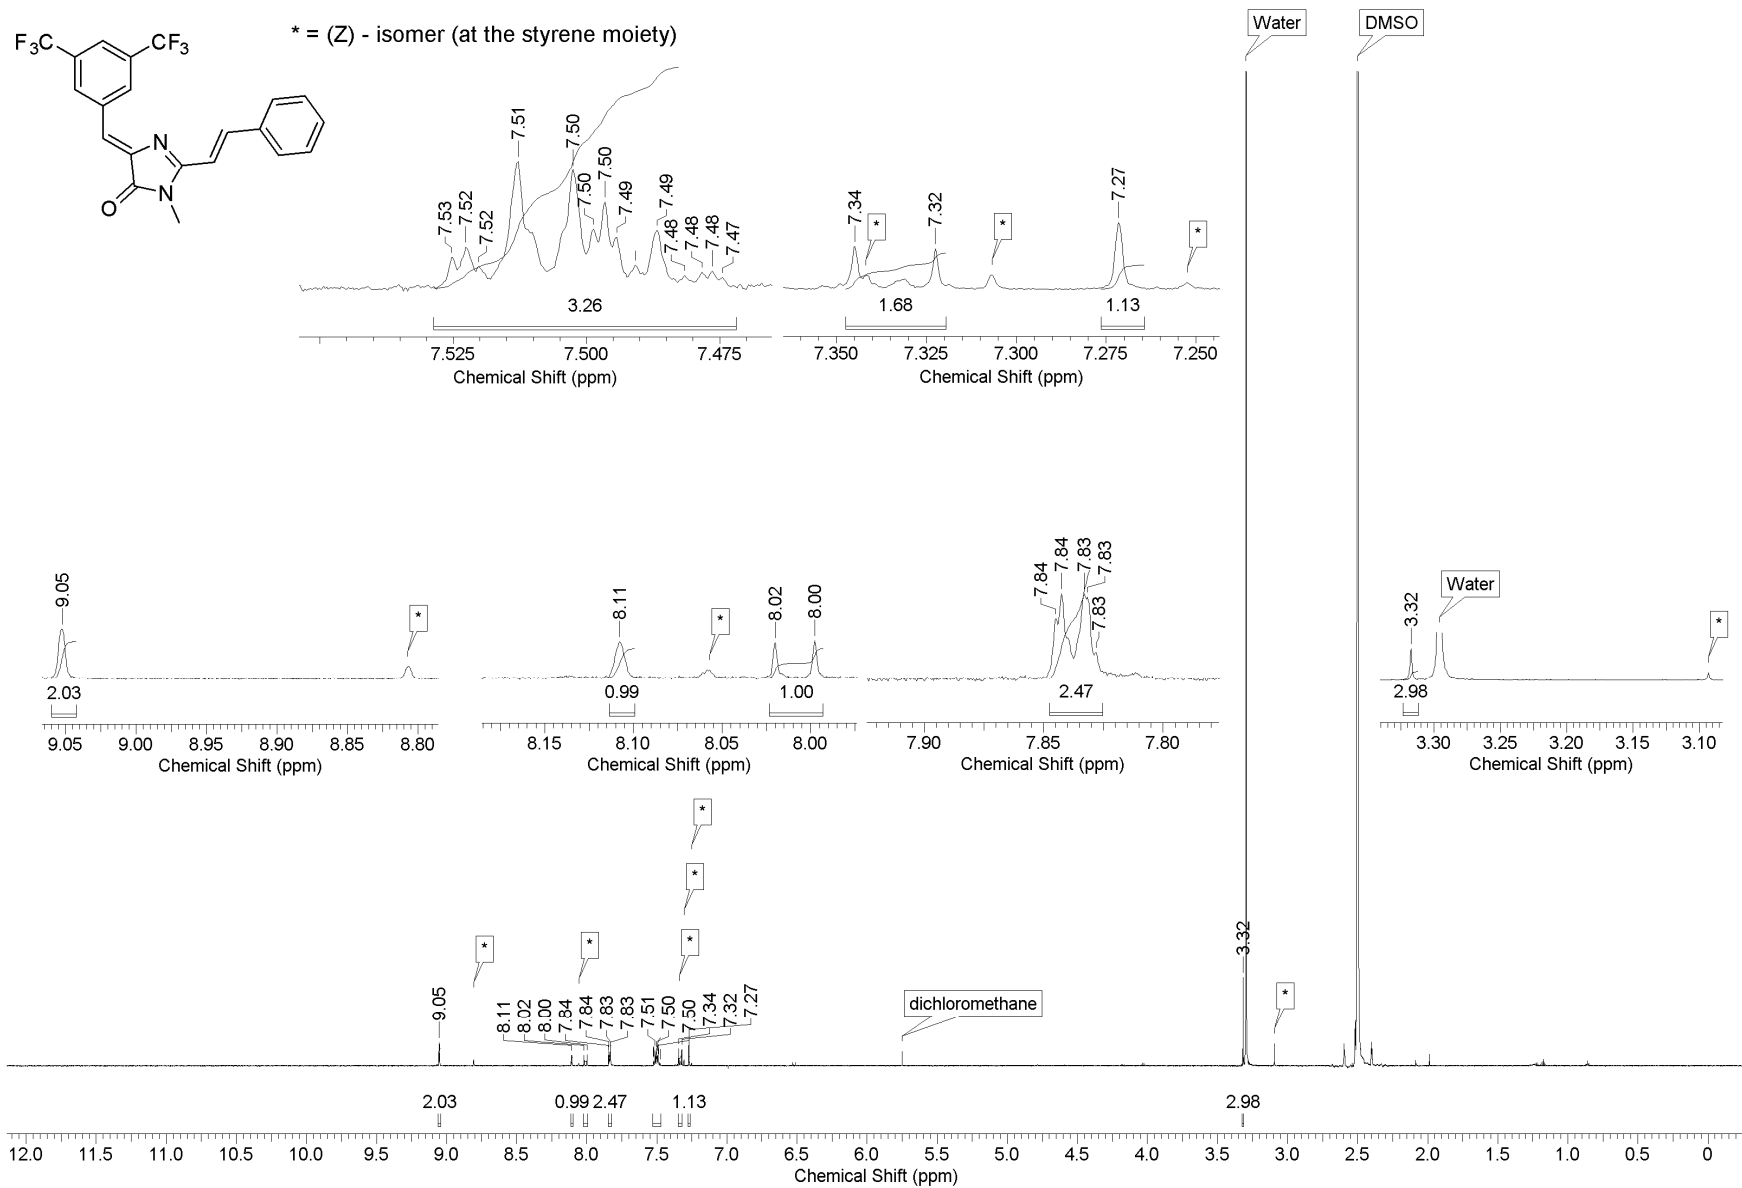

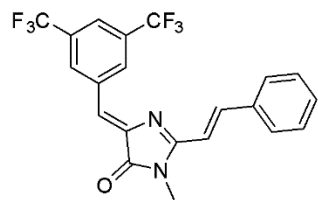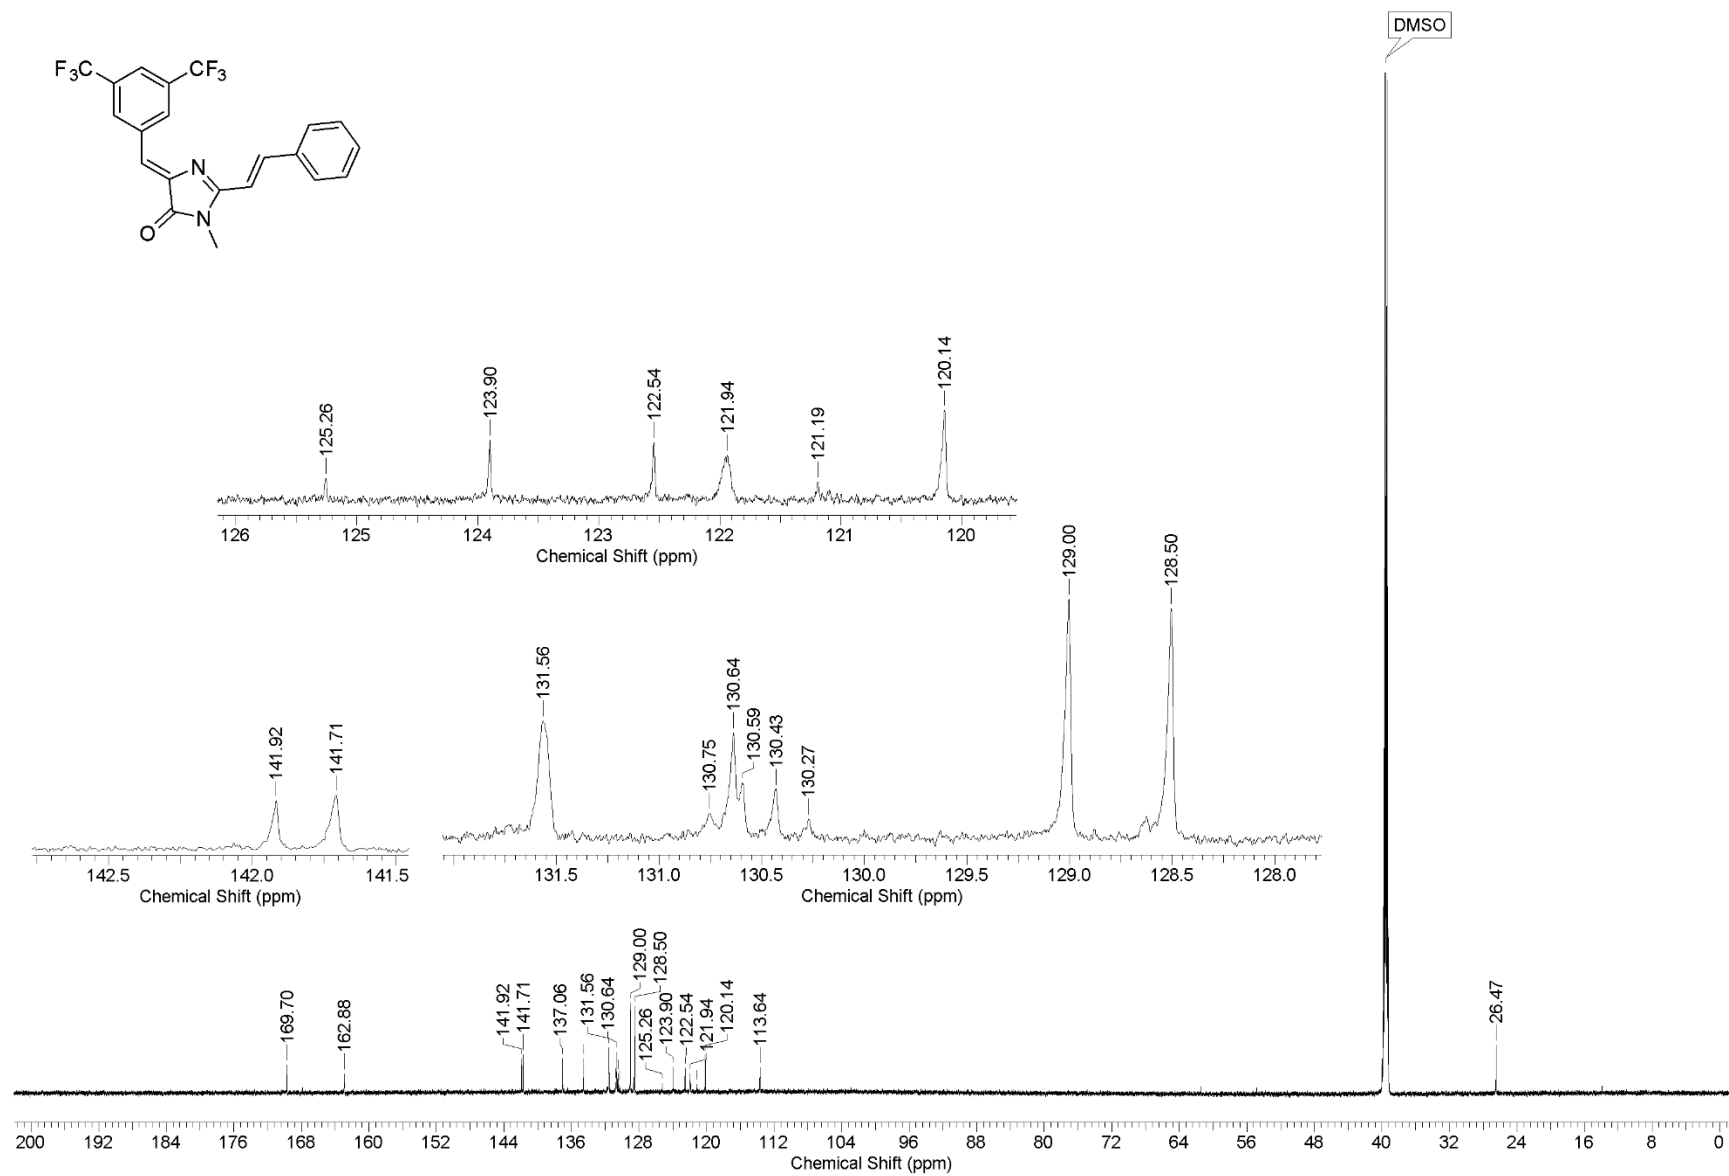

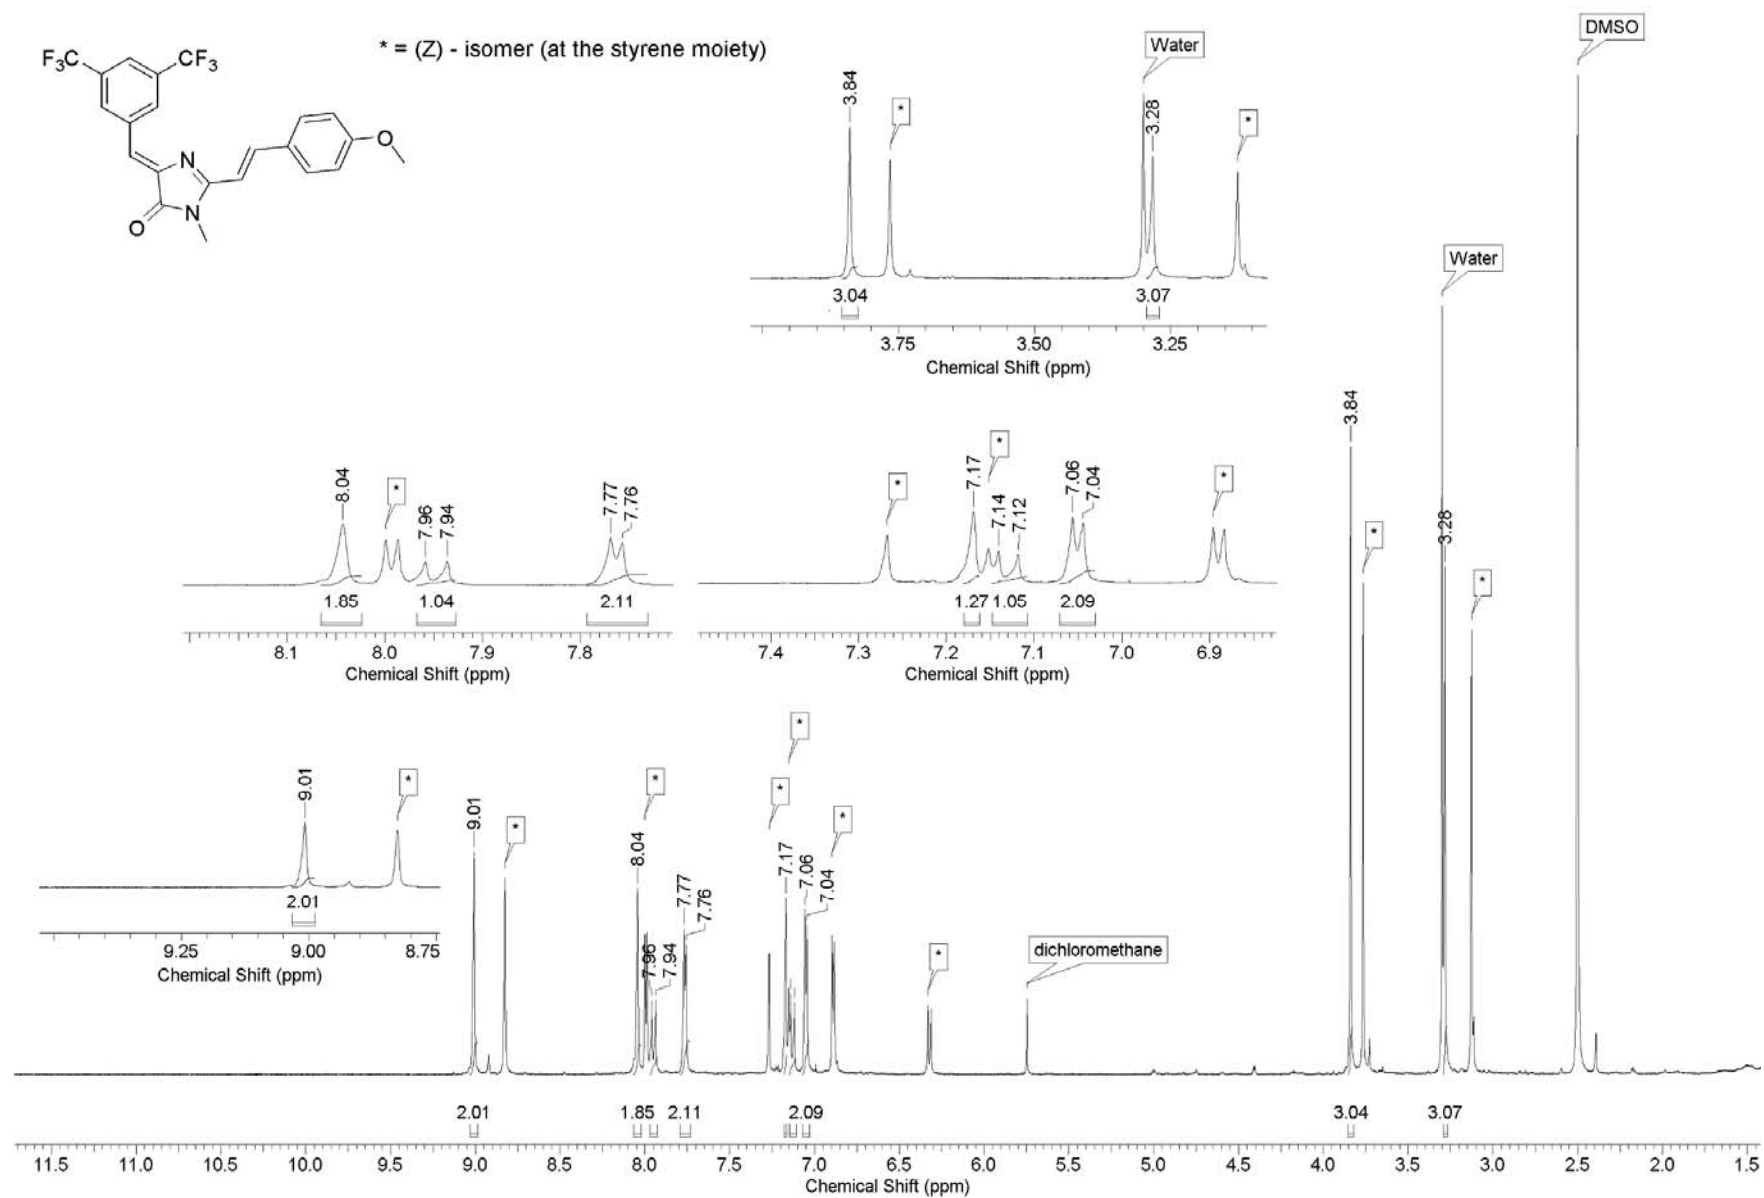

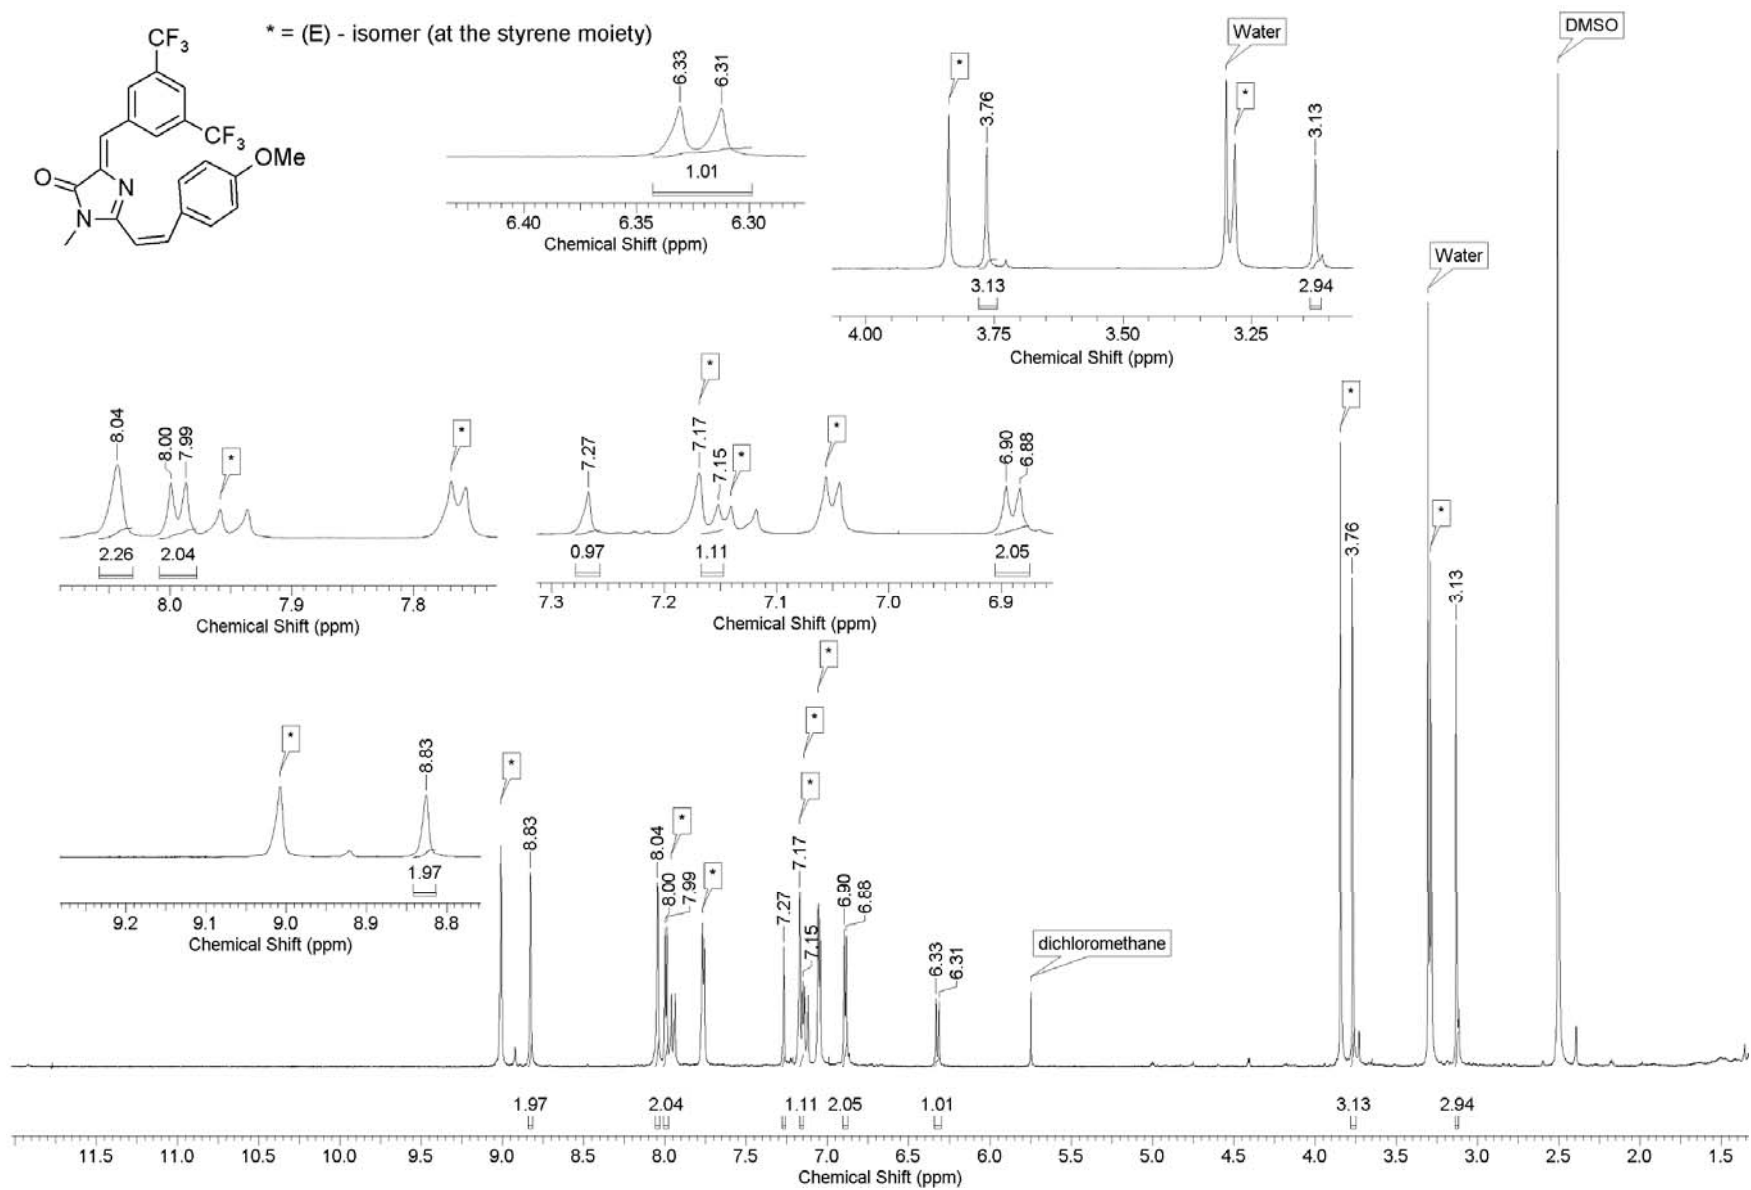

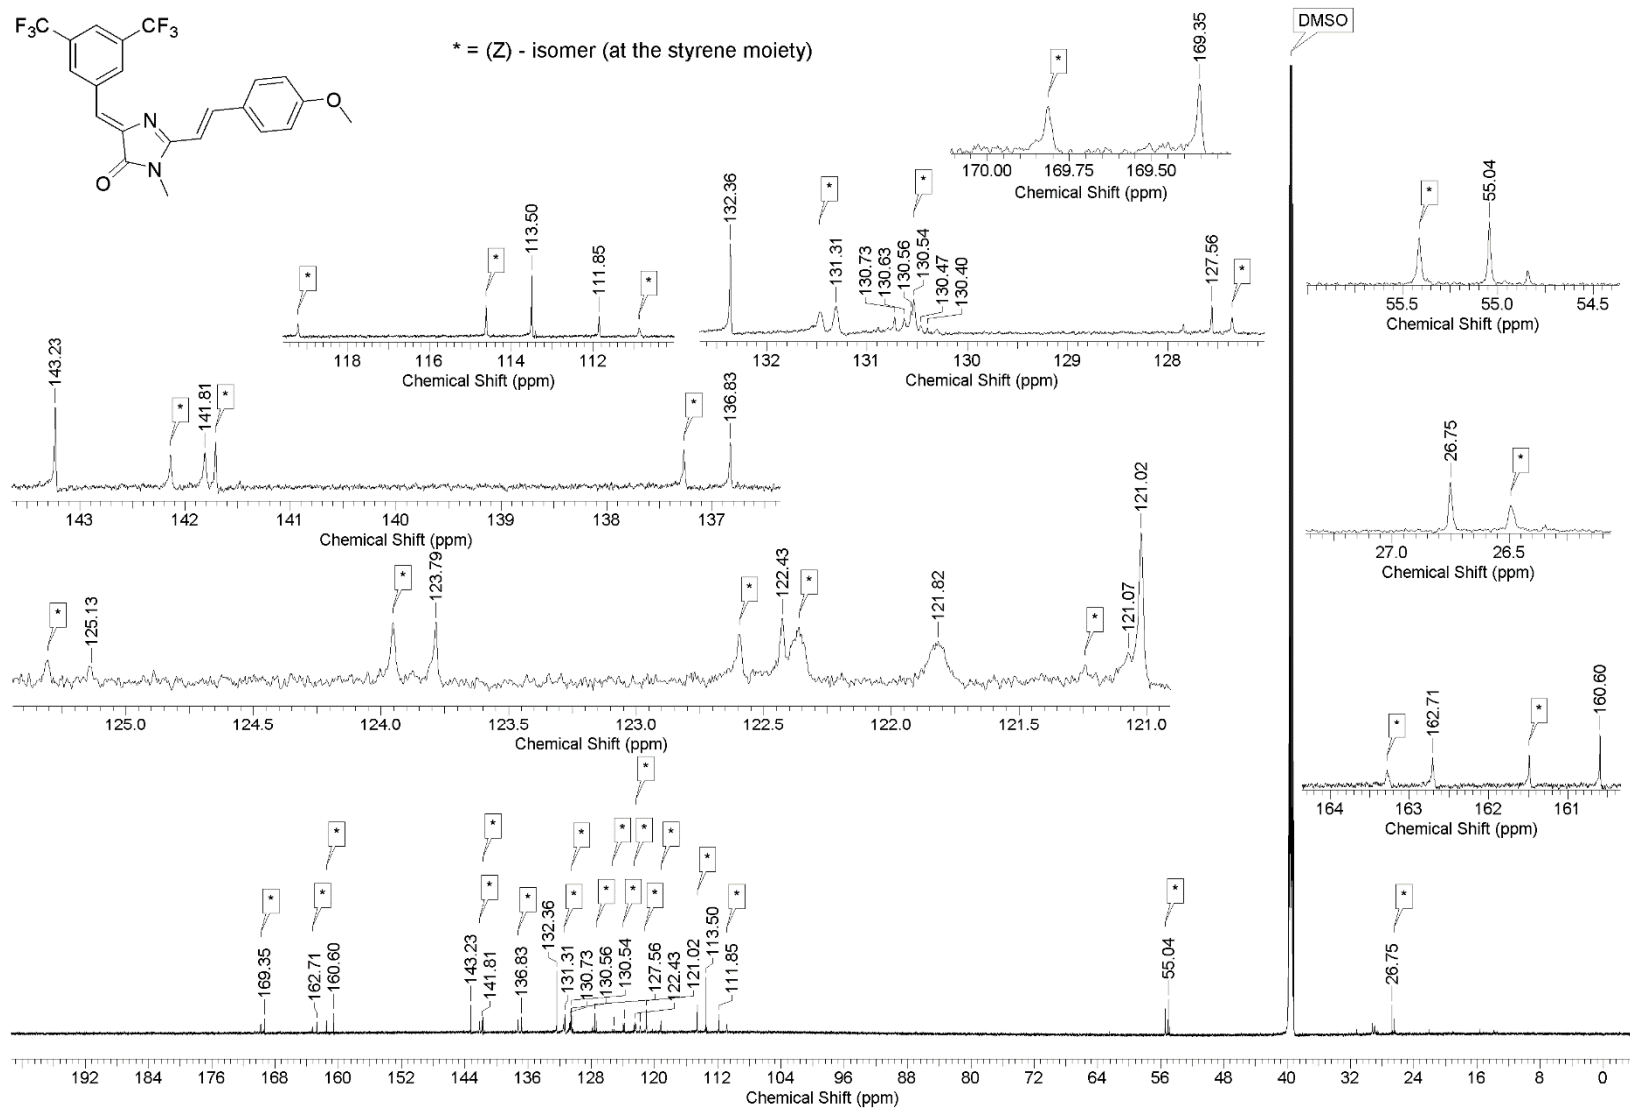

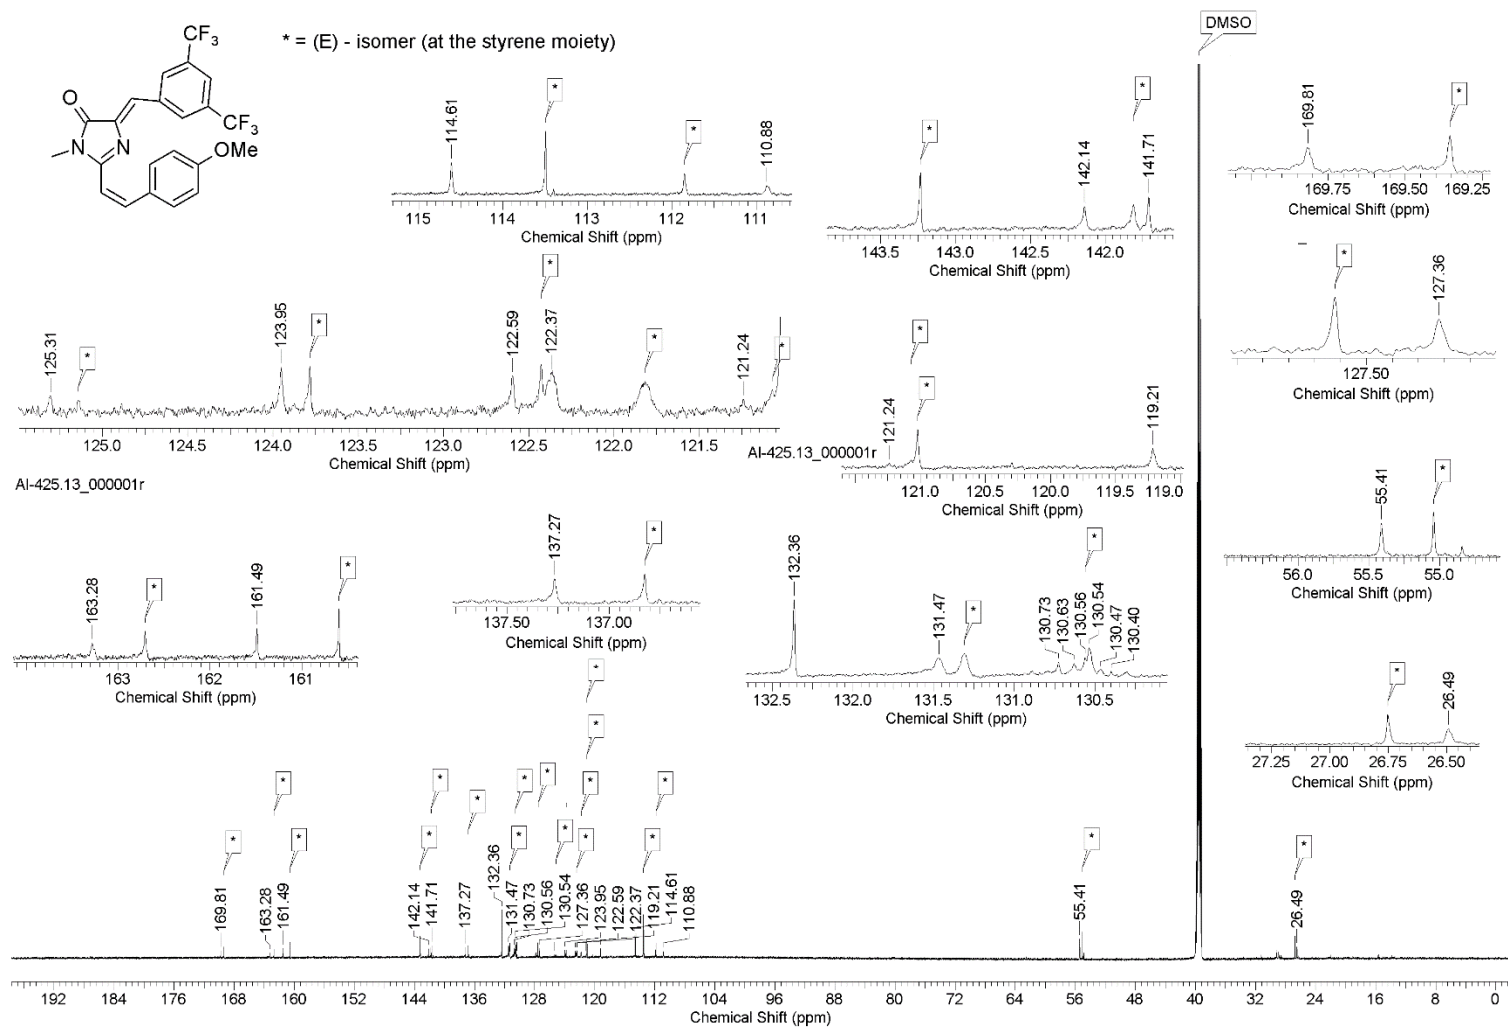

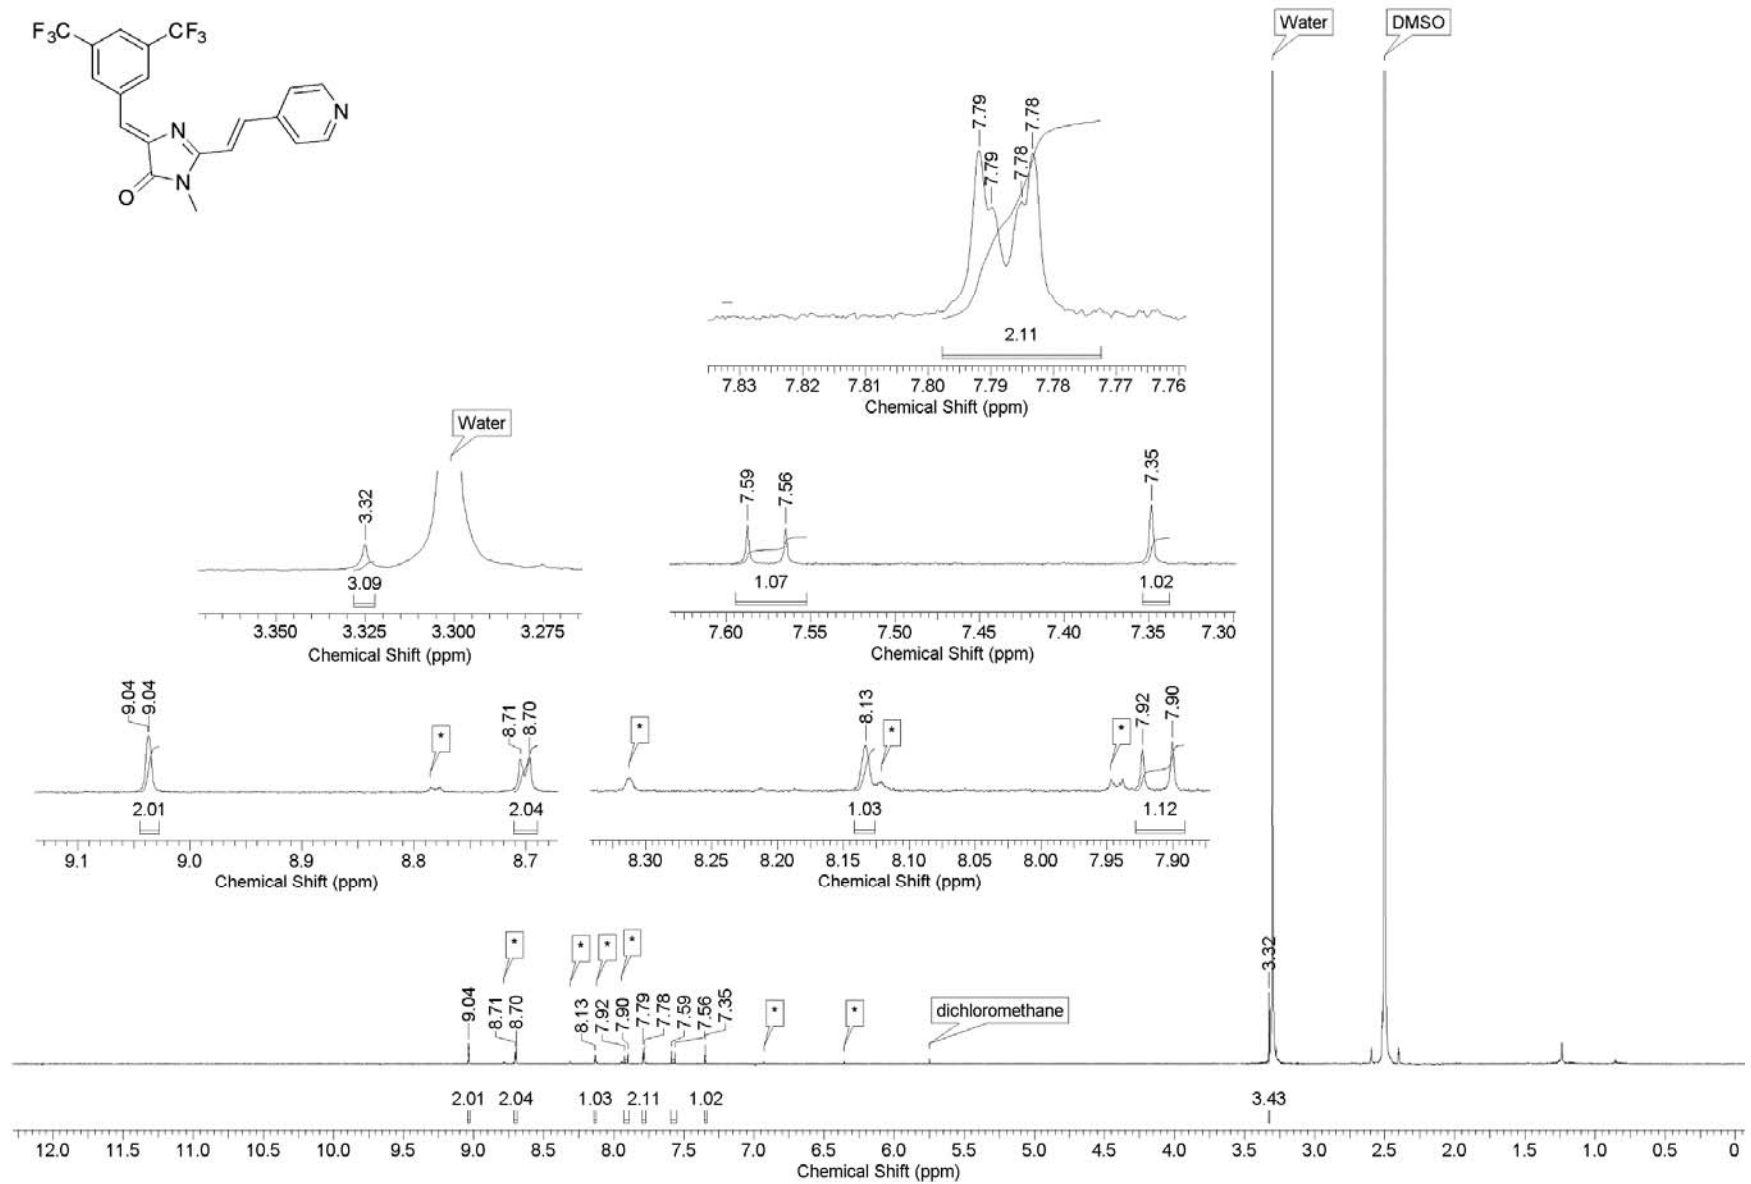

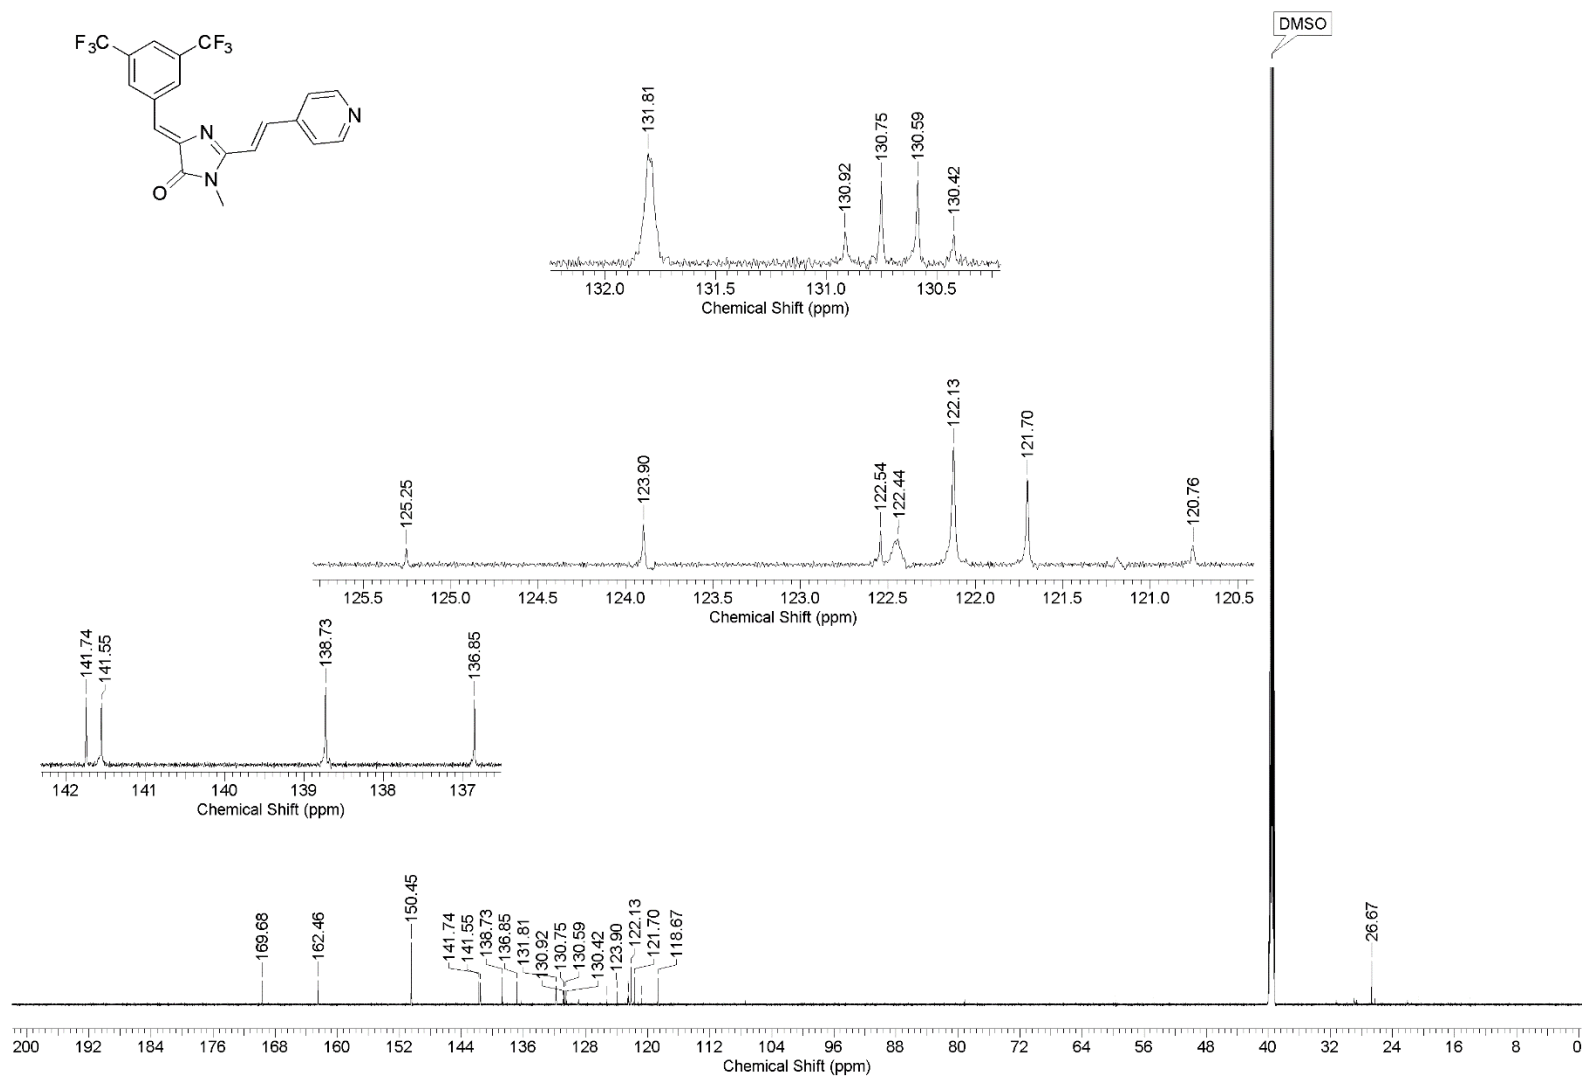

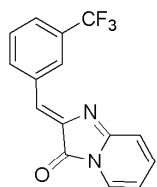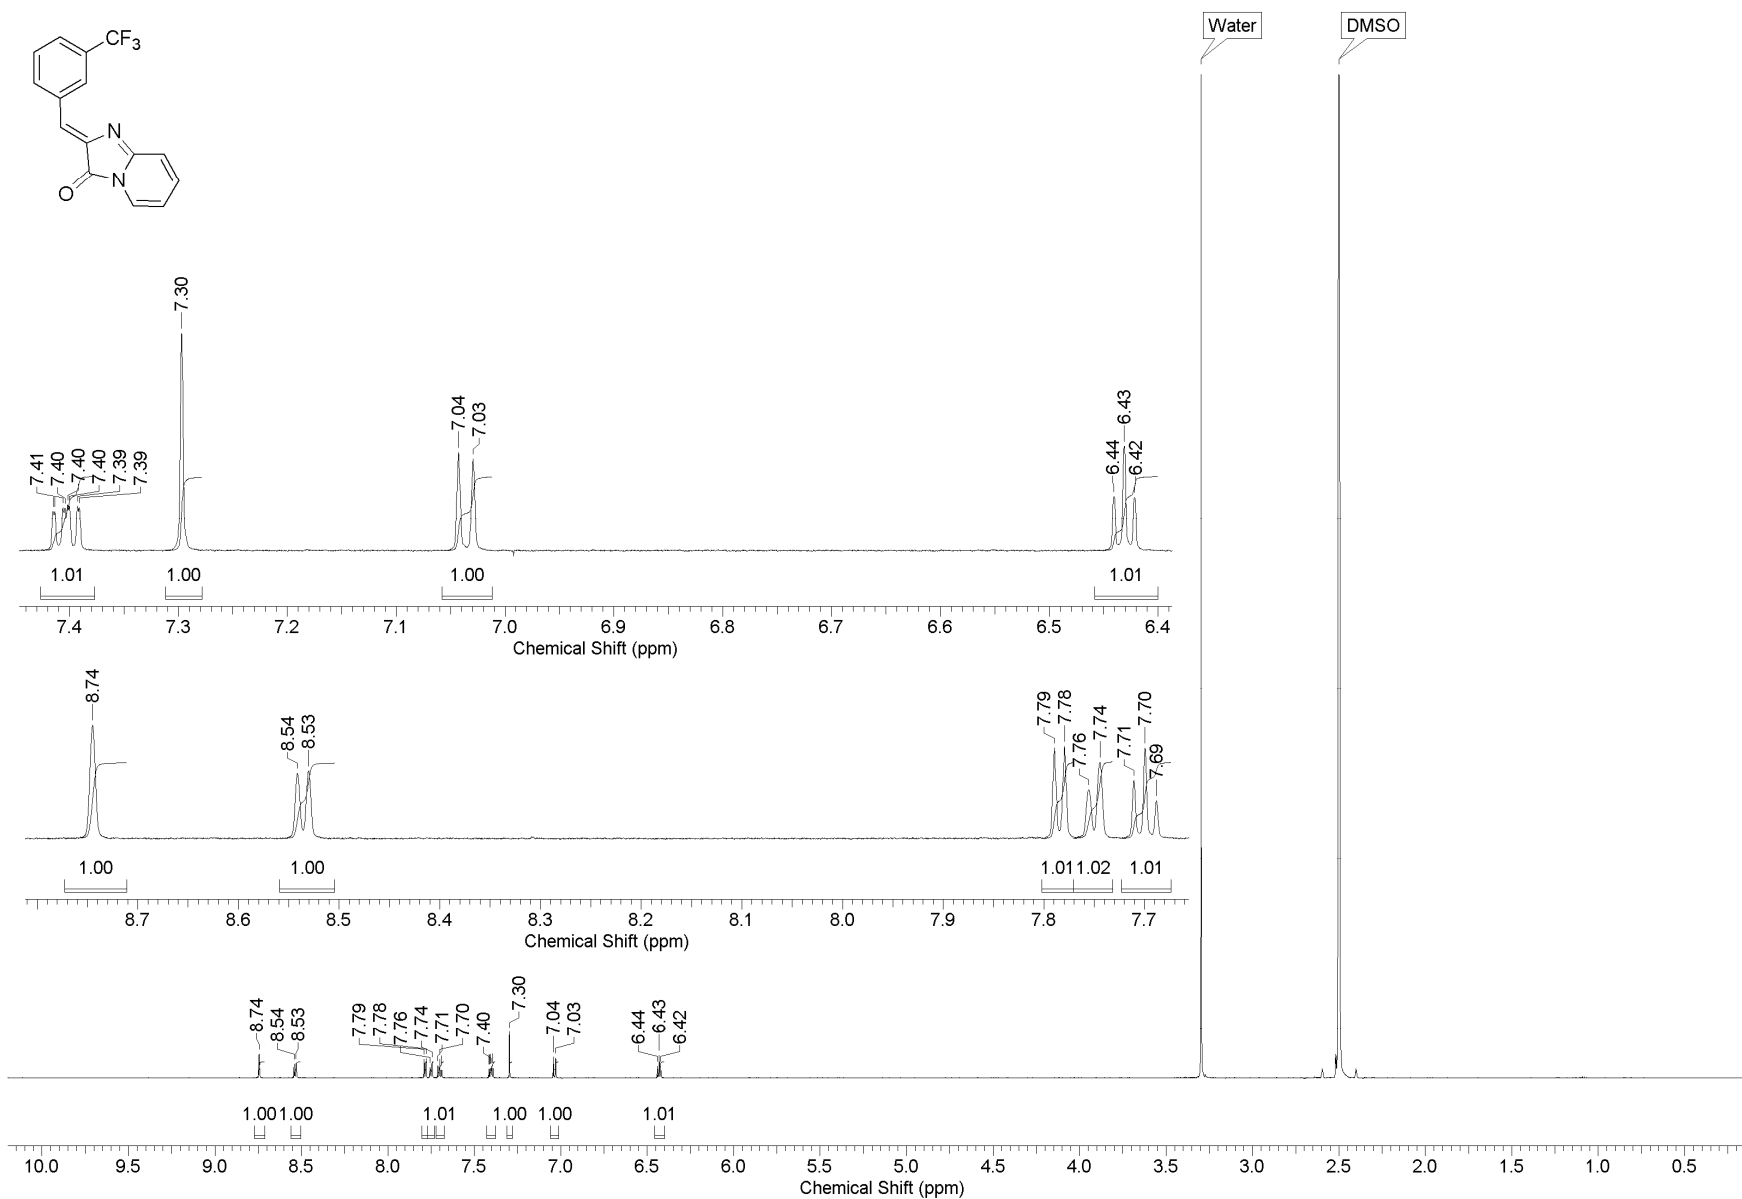

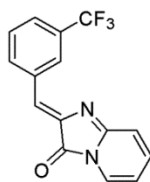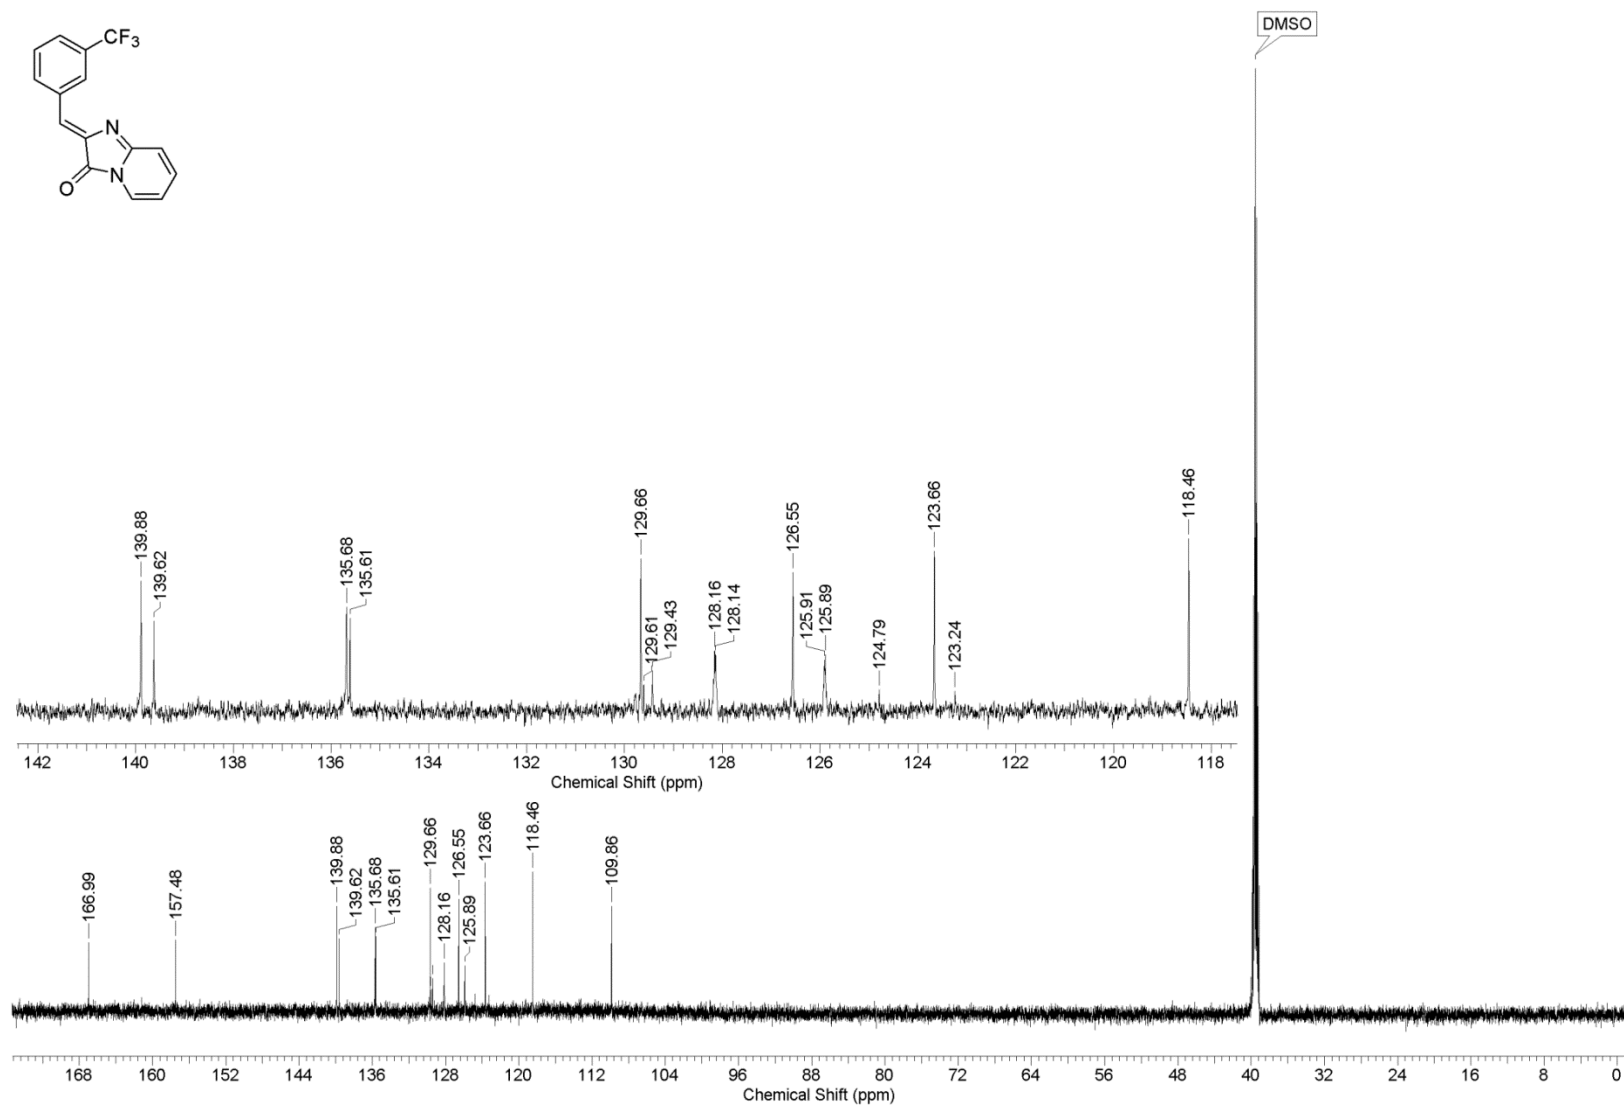

Supplement: Supplementary file 1 [file ijms-24-09923-s001.zip › ijms-2431212-supplementary.pdf]
